# Supplementary material for: Global Trends in Decolonizing Social Work Curricula: A Systematic Review
Source: Research Square preprint supplement (doi:10.21203/rs.3.rs-7582311/v1), 2025-11-04
Supplement: Supplementary file 1 [file df1da2265546714546d8586e.xlsx]

## Sheet: Datasheet
"About the data: Exported on Aug 17, 2025. Criteria: '("social work education" OR "social work curriculum*" OR "social work teaching") AND (decoloniz* OR "culturally adapted" OR "Indigenous knowledge" OR "cultural competence" OR "anti-oppressive education") AND (Western OR Eurocentric OR "mainstream curriculum") AND ("comparative study" OR "program evaluation" OR "case study" OR "empirical study"…
S.No	Rank	Publication ID	DOI	PMID	PMCID	Title	Abstract	Acknowledgements	Funding	Source title	Anthology title	Book editors	MeSH terms	Publication date	PubYear	Publication date (online)	Publication date (print)	Volume	Issue	Pagination	Open Access	Publication Type	Authors	Authors (Raw Affiliation)	Corresponding Authors	Authors Affiliations	Times cited	Recent citations	RCR	FCR	Source Linkout	Dimensions URL	Fields of Research (ANZSRC 2020)	Sustainable Development Goals
1	9778	pub.1156435427	10.3390/ijerph20065217	36982126	PMC10049537	Indigenous Cultural Safety Training for Applied Health, Social Work, and Education Professionals: A PRISMA Scoping Review	Anti-Indigenous racism is a widespread social problem in health and education systems in English-speaking colonized countries. Cultural safety training (CST) is often promoted as a key strategy to address this problem, yet little evidence exists on how CST is operationalized and evaluated in health and education systems. This scoping review sought to broadly synthesize the academic literature on …		No formal research funding was received to undertake this scoping review. The lead author received a one-year salaried Postdoctoral Fellowship from the Dean’s Office, Dalla Lana School of Public Health, University of Toronto, and a two-year salaried Canadian Institutes of Health Research Health System Impact Postdoctoral Fellowship, which enabled this research under the leadership of Angela Mashf…	International Journal of Environmental Research and Public Health			Humans; United States; Clinical Competence; Education, Professional; Educational Status; Canada; Social Work	2023-03-22	2023	2023-03-22		20	6	5217	All OA; Gold	Article	MacLean, Tammy L.; Qiang, Jinfan Rose; Henderson, Lynn; Bowra, Andrea; Howard, Lisa; Pringle, Victoria; Butsang, Tenzin; Rice, Emma; Di Ruggiero, Erica; Mashford-Pringle, Angela	MacLean, Tammy L. (Dalla Lana School of Public Health, University of Toronto, Toronto, ON M5T 3M7, Canada); Qiang, Jinfan Rose (Department of Psychology, University of Toronto Mississauga, Mississauga, ON L5L 1C6, Canada); Henderson, Lynn (Department of Clinical Studies, University of Guelph, Guelph, ON N1G 2W1, Canada); Bowra, Andrea (Dalla Lana School of Public Health, University of Toronto, To…	MacLean, Tammy L. (University of Toronto)	MacLean, Tammy L. (University of Toronto); Qiang, Jinfan Rose (University of Toronto Mississauga); Henderson, Lynn (University of Guelph); Bowra, Andrea (University of Toronto); Howard, Lisa (University of Toronto); Pringle, Victoria (University of Toronto Mississauga); Butsang, Tenzin (University of Toronto); Rice, Emma (University of Toronto); Di Ruggiero, Erica (University of Toronto); Mashfor…	20	14	4.42	34.92	https://www.mdpi.com/1660-4601/20/6/5217/pdf?version=1679470461	https://app.dimensions.ai/details/publication/pub.1156435427	44 Human Society; 4409 Social Work	4 Quality Education
2	7904	pub.1151703490	10.3390/ijerph191912713	36232013	PMC9566631	Building Emergency Response Capacity: Multi-Career-Stage Social Workers’ Engagement with Homeless Sector during the First Two Waves of COVID-19 in Halifax, Nova Scotia, Canada	The dramatic increase of global extreme events (e.g., natural, technological, and willful hazards) propels social workers to be equipped with emergency response capacity, supporting affected individuals, families, and communities to prepare, respond, and recover from disasters. Although social workers have historically been engaged in emergency response, social work curriculum and professional tr…	The authors would like to thank the editor’s editorial leadership.	This research was funded by the Canada Research Chairs Program, grant number CRC-2020-00128 and Dalhousie University Faculty of Health Research Development Grant, grant number 2020.	International Journal of Environmental Research and Public Health			COVID-19; Curriculum; Ill-Housed Persons; Humans; Nova Scotia; Social Workers	2022-10-05	2022	2022-10-05		19	19	12713	All OA; Gold	Article	Wu, Haorui; Karabanow, Jeff; Hoddinott, Tonya	Wu, Haorui (School of Social Work, Dalhousie University, Halifax, NS B3H 4R2, Canada.); Karabanow, Jeff (School of Social Work, Dalhousie University, Halifax, NS B3H 4R2, Canada.); Hoddinott, Tonya (School of Social Work, Dalhousie University, Halifax, NS B3H 4R2, Canada.)	Wu, Haorui (Dalhousie University)	Wu, Haorui (Dalhousie University); Karabanow, Jeff (Dalhousie University); Hoddinott, Tonya (Dalhousie University)	8	4	0.17	9.02	https://www.mdpi.com/1660-4601/19/19/12713/pdf?version=1664956894	https://app.dimensions.ai/details/publication/pub.1151703490	44 Human Society; 4409 Social Work	11 Sustainable Cities and Communities; 4 Quality Education
3	7695	pub.1142927147	10.1080/10437797.2021.1985026	36874948	PMC9983732	Teaching Note—#BlackGirlsMatter and the Social Work Curriculum: Integrating Intersectionality Within Social Work Education	Black girls in the United States face a double or triple jeopardy that places them at risk compared to White girls and other ethnic minority girls. Furthermore, their voices and experiences are often ignored and not discussed fully within the social work classrooms. Since the social work profession is founded on social justice and equity, we urge educators to center the experiences of Black girls…			Journal of Social Work Education				2021-10-29	2021	2021-10-29	2023-01-02	59	1	263-269	All OA; Green	Article	Opara, Ijeoma; Brown, Tiffany L	Opara, Ijeoma (Department of Social and Behavioral Sciences, Yale School of Public Health.); Brown, Tiffany L (Department of Family and Consumer Sciences, California State Long Beach.)	Opara, Ijeoma (Department of Social and Behavioral Sciences, Yale School of Public Health.)	Opara, Ijeoma (Department of Social and Behavioral Sciences, Yale School of Public Health.); Brown, Tiffany L (Department of Family and Consumer Sciences, California State Long Beach.)	2	1	0.54	1.23	https://www.ncbi.nlm.nih.gov/pmc/articles/9983732	https://app.dimensions.ai/details/publication/pub.1142927147	44 Human Society; 4409 Social Work	4 Quality Education
4	7603	pub.1159703253	10.1177/00208728231178386		PMC10261943	COVID-19 and the changing roles of social workers in minority communities: Lessons from the Israeli ultra-Orthodox community	Minority groups have been disproportionately vulnerable to COVID-19’s effects. Whereas, social workers have been instrumental in countering those effects, their roles have been understudied, particularly during the ‘new normal’ that followed the outbreak. This gap is addressed by drawing on interviews with 28 social workers in the Jewish ultra-Orthodox (Haredi) society in Israel, held after the o…		Funding The authors received no financial support for the research, authorship, and/or publication of this article.	International Social Work				2023-06-10	2023	2023-06-10	2024-05	67	3	761-776	All OA; Green	Article	Tarshish, Noam; Nouman, Hani; Altshuler, Alex	Tarshish, Noam (The University of Haifa, Israel); Nouman, Hani (The University of Haifa, Israel); Altshuler, Alex (The University of Haifa, Israel)	Tarshish, Noam (University of Haifa)	Tarshish, Noam (University of Haifa); Nouman, Hani (University of Haifa); Altshuler, Alex (University of Haifa)	1	1		1.75	https://www.ncbi.nlm.nih.gov/pmc/articles/10261943	https://app.dimensions.ai/details/publication/pub.1159703253	44 Human Society; 4409 Social Work
5	7386	pub.1137837779	10.1093/bjsw/bcab101	34393656	PMC8344926	COVID-19 and BLM: Humanitarian Contexts Necessitating Principles from First Nations World Views in an Intercultural Social Work Curriculum	Unprecedented trends of complex humanitarian contexts are unfolding globally, and they are driven by numerous humanitarian crisis drivers. Two of the more recent and ongoing crisis drivers are the Coronavirus Pandemic 2019 and the Black Lives Matter (BLM) movement. While the pandemic has already caused a direct impact on unprepared health systems and caused secondary havoc on already fragile coun…			The British Journal of Social Work				2021	2021	2021		51	5	1820-1838	All OA; Green	Article	Townsend, Annie; McMahon, Mishel	Townsend, Annie (Department of Social Work and Social Policy, La Trobe Rural Health School, College of Science Health and Engineering, La Trobe University, Edwards Road, Flora Hill, Bendigo 3552, Australia); McMahon, Mishel (La Trobe University Shepparton Campus, Shepparton Victoria, 3630, Australia)	Townsend, Annie (La Trobe University)	Townsend, Annie (La Trobe University); McMahon, Mishel (La Trobe University)	12	4	0.25	7.38	https://www.ncbi.nlm.nih.gov/pmc/articles/8344926	https://app.dimensions.ai/details/publication/pub.1137837779	44 Human Society; 4409 Social Work	10 Reduced Inequalities
6	7124	pub.1033965346	10.1093/bjsw/bcu105	27559207	PMC4986078	Family Group Conferences and Cultural Competence in Social Work	Family Group Conferences (FGCs) as a method of preventive work came into being over two decades ago. The FGC approach arose from a minority cultural perspective and the rising numbers of Maori children in state care in New Zealand. Two decades after the Family Rights Group first championed FGC in the UK, it is a great concern that we know little or nothing about how such an approach is being util…			The British Journal of Social Work				2015-01-22	2015	2015-01-22	2016-06	46	4	942-959	All OA; Bronze	Article	Barn, Ravinder; Das, Chaitali	Barn, Ravinder (Centre for Criminology and Sociology, School of Law, Royal Holloway University of London, Egham Hill, Egham, Surrey, TW20 0EX. Chaitali Das is Policy and Student Support Co-ordinator, Jacobs University Bremen.); Das, Chaitali (Centre for Criminology and Sociology, School of Law, Royal Holloway University of London, Egham Hill, Egham, Surrey, TW20 0EX. Chaitali Das is Policy and St…	Barn, Ravinder (Royal Holloway University of London)	Barn, Ravinder (Royal Holloway University of London); Das, Chaitali (Royal Holloway University of London)	35	11	0.15	9.74	https://academic.oup.com/bjsw/article-pdf/46/4/942/7495706/bcu105.pdf	https://app.dimensions.ai/details/publication/pub.1033965346	44 Human Society; 4409 Social Work	5 Gender Equality
7	6658	pub.1059436632	10.1093/bjsw/bcv002	27559202	PMC4986073	Social Work Field Training for the Community: A Student Self-Directed Approach in the Environmental Domain in Jordan	This article outlines innovative field training methods that foster the abilities of undergraduate social work students so that they are able to empower the local community and raise awareness of environmental issues. In this study, students were engaged in a local community assessment that sought to understand their views on environmental and community impacts of the Synchrotron-Light for Experi…			The British Journal of Social Work				2015-02-16	2015	2015-02-16	2016-06	46	4	855-872	All OA; Bronze	Article	Al-Makhamreh, Sahar; Alnabulsi, Hana; Asfour, Hana	Al-Makhamreh, Sahar (Department of Social Work, Princess Rahma University College, Al Balqa Applied University, PO Box 15 Allan-Salt, Salt, Jordan); Alnabulsi, Hana (Department of Social Work, Princess Rahma University College, Al Balqa Applied University, PO Box 15 Allan-Salt, Salt, Jordan); Asfour, Hana (University of Warwick, School of Health and Social Studies, Coventry, Warwickshire, CV4 7AL…	Al-Makhamreh, Sahar (Al-Balqa Applied University)	Al-Makhamreh, Sahar (Al-Balqa Applied University); Alnabulsi, Hana (Al-Balqa Applied University); Asfour, Hana (University of Warwick)	13	3		3.89	https://academic.oup.com/bjsw/article-pdf/46/4/855/7496234/bcv002.pdf	https://app.dimensions.ai/details/publication/pub.1059436632	44 Human Society; 4409 Social Work
8	5320	pub.1190497214	10.1111/jmft.70050	40613473		Deepening Understanding of Family Dynamics in Chinese Culture: Reflective Writing in Professional Education	Understanding one's family of origin is essential for students in the helping professions, as it fosters self-awareness and illuminates personal strengths and vulnerabilities. This qualitative study examines the family experiences of Taiwanese undergraduate social work students, focusing on cultural influences on self-development and the effectiveness of reading and reflective writing in deepenin…	Acknowledgments We sincerely thank Mr. Hou‐Kai Chen for his book The Translator of Love: Stories of Family Therapy Cases, which served as an inspiring touchstone for participants&#x27; reflective writing. We admire participants&#x27; courage in connecting the text with their own familial experiences, deepening their understanding of relational patterns and cultivating greater professional and the…		Journal of Marital and Family Therapy			Adult; Female; Humans; Male; Young Adult; Education, Professional; Family Relations; Parent-Child Relations; Qualitative Research; Taiwan; Writing; East Asian People	2025-07-04	2025	2025-07-04	2025-07	51	3	e70050	All OA; Bronze	Article	Lin, Pei‐Chin; Chang, Kai‐Tang; Hsiung, Ping‐Chuan	Lin, Pei‐Chin (Department of Social Work, Soochow University, Taipei, Taiwan); Chang, Kai‐Tang (Department of Community, Family, and Addiction Sciences, Texas Tech University, Lubbock, Texas, USA); Hsiung, Ping‐Chuan (Get Up and Go: Persistent Pediatric Pain Service, Holland Bloorview Kids Rehabilitation Hospital, Toronto, Ontario, Canada)	Hsiung, Ping‐Chuan (Holland Bloorview Kids Rehabilitation Hospital)	Lin, Pei‐Chin (Soochow University); Chang, Kai‐Tang (Texas Tech University); Hsiung, Ping‐Chuan (Holland Bloorview Kids Rehabilitation Hospital)	0	0			https://onlinelibrary.wiley.com/doi/pdfdirect/10.1111/jmft.70050	https://app.dimensions.ai/details/publication/pub.1190497214	42 Health Sciences; 4206 Public Health; 44 Human Society; 4409 Social Work; 52 Psychology; 5203 Clinical and Health Psychology	4 Quality Education
9	5271	pub.1136549687	10.3390/ijerph18063208	33808847	PMC8003609	Contesting Sexual Prejudice to Support Sexual Minorities: Views of Chinese Social Workers	Professional development has been recognized as one of the strategies to effectively combat sexual prejudice and negative attitudes against lesbian, gay, bisexual, questioning/queer (LGBQ+) individuals and sexual minorities. Nevertheless, studies related to LGBQ+-inclusive training are rarely found in the Chinese Hong Kong context, where sexual prejudice still prevails without the establishment o…	The author is grateful to research informants for their trust and openness during the sharing of their perspectives. Special thanks go to Damon Ho and William Wong who provided logistic, translation, and coding support of the study. Thank you also to Barry Lee and Victoria Shui for providing peer debriefing guidance and outreach supports.	This research was funded by The Research Grants Council (Hong Kong), grant number 18609415.	International Journal of Environmental Research and Public Health			China; Female; Hong Kong; Humans; Language; Prejudice; Sexual and Gender Minorities; Social Workers	2021-03-19	2021	2021-03-19		18	6	3208	All OA; Gold	Article	Kwok, Diana K	Kwok, Diana K (Department of Special Education and Counselling, The Education University of Hong Kong, Hong Kong.)		Kwok, Diana K (Education University of Hong Kong)	9	2	0.42	5.7	https://www.mdpi.com/1660-4601/18/6/3208/pdf?version=1616221483	https://app.dimensions.ai/details/publication/pub.1136549687	44 Human Society; 4405 Gender Studies; 4409 Social Work
10	4534	pub.1135387692	10.1177/1524838020985571	33573523		Integrating Trauma and Violence Informed Care in Primary Health Care Settings for First Nations Women Experiencing Violence: A Systematic Review	It is imperative that access to primary health care services is equitable as health care practitioners are often the first responders to women who experience violence. This is of particular importance for First Nations women who disproportionately experience interpersonal and structural violence when compared to non-First Nations women, as well as the ongoing impact of colonization, racism, and i…	We gratefully acknowledge funding from Lowitja Institute and The George Institute for Global Health and sincerely appreciate Yerin Aboriginal Health Service, Waminda South Coast Women’s Health and Welfare Aboriginal Corporation, Illawarra Aboriginal Medical Service, and Katungul Aboriginal Corporation Community &amp; Medical Services for their support and collaboration as partners in the First Re…	Funding The author(s) disclosed receipt of the following financial support for the research, authorship, and/or publication of this article: This work was funded by the Lowitja Institute, and The George Institute for Global Health. Patricia Cullen is funded by an National Health & Medical Research Council (NHMRC) Early Career Fellowship, Marlene Longbottom by Vice Chancellor Aboriginal Postdoctor…	Trauma Violence & Abuse			Aged; Disclosure; Female; Humans; Primary Health Care; Social Stigma; Trust; Violence	2021-02-12	2021	2021-02-12	2022-10	23	4	1204-1219	All OA; Green	Article	Cullen, Patricia; Mackean, Tamara; Walker, Natasha; Coombes, Julieann; Bennett-Brook, Keziah; Clapham, Kathleen; Ivers, Rebecca; Hackett, Maree; Worner, Faye; Longbottom, Marlene	Cullen, Patricia (School of Population Health, UNSW, Sydney, Australia; The George Institute for Global Health, UNSW, Sydney, Australia; Ngarruwan Ngadju, First Peoples Health and Wellbeing Research Centre, University of Wollongong, Wollongong, Australia); Mackean, Tamara (School of Population Health, UNSW, Sydney, Australia; The George Institute for Global Health, UNSW, Sydney, Australia; Colleg…	Cullen, Patricia (UNSW Sydney; UNSW Sydney; University of Wollongong)	Cullen, Patricia (UNSW Sydney; UNSW Sydney; University of Wollongong); Mackean, Tamara (UNSW Sydney; UNSW Sydney; Flinders University); Walker, Natasha (UNSW Sydney; UNSW Sydney); Coombes, Julieann (UNSW Sydney); Bennett-Brook, Keziah (UNSW Sydney); Clapham, Kathleen (University of Wollongong); Ivers, Rebecca (UNSW Sydney; UNSW Sydney; Flinders University); Hackett, Maree (UNSW Sydney); Worner, F…	36	26	3.94	17.04	http://hdl.handle.net/1959.4/102451	https://app.dimensions.ai/details/publication/pub.1135387692	44 Human Society; 4402 Criminology; 4409 Social Work; 52 Psychology; 5203 Clinical and Health Psychology	3 Good Health and Well Being; 5 Gender Equality
11	3883	pub.1157772010	10.1007/s10896-023-00552-4	37358988	PMC10157572	A Scoping Review on the Use of Experiential Learning in Professional Education on Intimate Partner Violence	PurposeIntimate partner violence (IPV) involves any form of emotional, physical, and sexual abuse including controlling behaviors by an intimate partner. Front line service workers such as social workers, nurses, lawyers, and physicians are often the first professionals to come into contact with individuals experiencing IPV but are often inadequately prepared to respond appropriately as IPV educa…	This work was supported by a University of Calgary, Taylor Institute for Teaching and Learning grant. The funders had no role in study design, data collection and analysis, decision to publish, or preparation of the manuscript.		Journal of Family Violence				2023-05-04	2023	2023-05-04	2024-08	39	6	1187-1206	All OA; Bronze	Article	Allison, Aurora; Weerahandi, Ambereen; Johnson, Torri; Koshan, Jennifer; Bagstad, Georgina; Ferreira, Carla; Jenney, Angelique; Krut, Breanne A.; Wollny, Krista	Allison, Aurora (Faculty of Law, University of Calgary, Calgary, AB, Canada); Weerahandi, Ambereen (Faculty of Nursing, University of Calgary, Drive NW, PF 3239, T2N 1N4, Calgary, AB, Canada); Johnson, Torri (Faculty of Nursing, University of Calgary, Drive NW, PF 3239, T2N 1N4, Calgary, AB, Canada); Koshan, Jennifer (Faculty of Law, University of Calgary, Calgary, AB, Canada); Bagstad, Georgina …	Wollny, Krista (University of Calgary)	Allison, Aurora (University of Calgary); Weerahandi, Ambereen (University of Calgary); Johnson, Torri (University of Calgary); Koshan, Jennifer (University of Calgary); Bagstad, Georgina (University of Calgary); Ferreira, Carla (University of British Columbia); Jenney, Angelique (University of Calgary); Krut, Breanne A. (University of Calgary); Wollny, Krista (University of Calgary)	5	4	0.55	8.73	https://link.springer.com/content/pdf/10.1007/s10896-023-00552-4.pdf	https://app.dimensions.ai/details/publication/pub.1157772010	44 Human Society; 4409 Social Work	16 Peace, Justice and Strong Institutions
12	3330	pub.1157455766	10.1080/26408066.2023.2202665	37264677		A Systematic Review of Social Work in General Practice: Opportunities and Challenges	PURPOSE: This study identified the nature of social work practice in primary health care and described the reported patient outcomes, benefits, challenges, and enablers of social work in general practice [GP] settings. METHOD: A systematic literature review applying the Prisma framework was conducted. RESULTS: A total of 26 studies met the inclusion criteria. Social work practice in GP assists in…		This work was supported by the North Queensland Primary Health Network [NQPHN] under grant number PS170	Journal of Evidence-Based Social Work				2023-04-23	2023	2023-04-23	2023-09-03	20	5	686-726	All OA; Hybrid	Article	Zuchowski, Ines; McLennan, Simoane	Zuchowski, Ines (Social Work and Human Services, College of Arts, Society and Education, James Cook University, Douglas, Townsville, Queensland, Australia); McLennan, Simoane (Social Work and Human Services, College of Arts, Society and Education, James Cook University, Douglas, Townsville, Queensland, Australia)	Zuchowski, Ines (James Cook University)	Zuchowski, Ines (James Cook University); McLennan, Simoane (James Cook University)	13	12	1.51	22.7	https://doi.org/10.1080/26408066.2023.2202665	https://app.dimensions.ai/details/publication/pub.1157455766	44 Human Society; 4409 Social Work	3 Good Health and Well Being
13	2921	pub.1032126568	10.1093/sw/55.1.63	20069942		The Common Factors Model: Implications for Transtheoretical Clinical Social Work Practice	Direct practice social workers today are challenged to address the requirements of the complex array of professional, organizational, institutional, and regulatory demands placed on them in the broader socioeconomic context of fewer resources and diminished public support for social welfare services in the United States. The common factors model provides an accessible, transtheoretical, empirical…			Social Work			Humans; Models, Theoretical; Professional-Patient Relations; Social Support; Social Work	2010-01-01	2010	2010-01-01	2010-01-01	55	1	63-73	All OA; Bronze	Article	Cameron, Mark; Keenan, Elizabeth King	Cameron, Mark (Department of Social Work, Southern Connecticut State University, New Haven, CT); Keenan, Elizabeth King (Department of Social Work, Southern Connecticut State University, New Haven, CT)	Cameron, Mark (Southern Connecticut State University)	Cameron, Mark (Southern Connecticut State University); Keenan, Elizabeth King (Southern Connecticut State University)	55	1	0.14	12.55	https://academic.oup.com/sw/article-pdf/55/1/63/5322020/55-1-63.pdf	https://app.dimensions.ai/details/publication/pub.1032126568	44 Human Society; 4409 Social Work
14	2774	pub.1142926573	10.1080/02615479.2021.1998427			Indigenous trauma and resilience: pathways to ‘bridging the river’ in social work education	The traumatic effects of colonization on generations of Indigenous peoples and communities are referred to as intergenerational trauma. Alongside intergenerational effects of trauma experienced by Indigenous peoples and cultures across the globe is the capacity for individual and collective resilience, whereby an individual has good life outcomes despite having been subjected to situations with a…			Social Work Education				2021-11-04	2021	2021-11-04	2023-10-03	42	7	968-985	All OA; Bronze	Article	Middelton-Moz, Jane; Mishna, Faye; Martell, Rebecca; Williams, Charmaine; Zuberi, Samar	Middelton-Moz, Jane (Factor-Inwentash Faculty of Social Work, University of Toronto, Toronto, Canada); Mishna, Faye (Factor-Inwentash Faculty of Social Work, University of Toronto, Toronto, Canada); Martell, Rebecca (Factor-Inwentash Faculty of Social Work, University of Toronto, Toronto, Canada); Williams, Charmaine (Factor-Inwentash Faculty of Social Work, University of Toronto, Toronto, Canada…	Mishna, Faye (University of Toronto)	Middelton-Moz, Jane (University of Toronto); Mishna, Faye (University of Toronto); Martell, Rebecca (University of Toronto); Williams, Charmaine (University of Toronto); Zuberi, Samar (University of Toronto)	3	3		1.84	https://www.tandfonline.com/doi/pdf/10.1080/02615479.2021.1998427?needAccess=true	https://app.dimensions.ai/details/publication/pub.1142926573	44 Human Society; 4409 Social Work
15	2753	pub.1152627270	10.18060/24986			#SocialWorkSoWhite: A Critical Perspective on Settler Colonialism, White Supremacy, and Social Justice in Social Work	To date, social work continues to be a predominantly white-dominated profession; this is true across all levels of the profession’s current and aspiring membership, including students, practitioners, and faculty members. This racial composition is remnant of our profession’s history of upholding white supremacy and legacy of white saviorism. Not surprisingly, foundational teachings of social work…			Advances in Social Work				2022-11-08	2022	2022-11-08		22	2	720-740	All OA; Gold	Article	BlackDeer, Autumn Asher; Ocampo, Maria Gandarilla	BlackDeer, Autumn Asher (Washington University in St. Louis, Brown School of Social Work); Ocampo, Maria Gandarilla (Washinton University in St. Louis, Brown School of Social Work)		BlackDeer, Autumn Asher (Washington University in St. Louis); Ocampo, Maria Gandarilla (Washinton University in St. Louis, Brown School of Social Work)	34	25		38.32	https://journals.iupui.edu/index.php/advancesinsocialwork/article/download/24986/24425	https://app.dimensions.ai/details/publication/pub.1152627270	44 Human Society; 4409 Social Work	16 Peace, Justice and Strong Institutions; 4 Quality Education
16	2732	pub.1167703634	10.1080/02615479.2023.2299245			Using the concept of epistemic injustice and cultural humility for understanding why and how social work curricular might be decolonized	The notion of decolonizing the curriculum is currently gaining momentum in Higher Education Institutions (HEI) across the world and in the United Kingdom (UK). Fuelled by the movements #RhodesMustFall, ‘Why is my curriculum White?’, and critical incidents such as the killing of George Floyd and the #BlackLivesMatter protests, campaigners for decolonizing the curriculum have all questioned the omi…			Social Work Education				2024-01-05	2024	2024-01-05	2024-12-20	43	9	2880-2896	All OA; Bronze	Article	Anka, Ann	Anka, Ann (School of Social Work, University of East Anglia, Norwich, UK)	Anka, Ann (University of East Anglia)	Anka, Ann (University of East Anglia)	6	6			https://www.tandfonline.com/doi/pdf/10.1080/02615479.2023.2299245?needAccess=true	https://app.dimensions.ai/details/publication/pub.1167703634	39 Education; 3902 Education Policy, Sociology and Philosophy; 3903 Education Systems; 44 Human Society; 4409 Social Work	4 Quality Education
17	2689	pub.1156345906	10.1080/02615479.2022.2161503			Re-imagining social work education in East Africa	To an increasing extent, scholars of social work have called for social work education and practice to be more responsive to local norms, customs and needs. Commonly referred to as indigenization, these scholars argue that social work curricula should incorporate practices, theories and understandings that are developed locally, eschewing the ‘professional imperialism’ that have come to dominate …		The work was supported by the Direktoratet for Utviklingssamarbeid.	Social Work Education				2023-02-17	2023	2023-03-20	2023-02-17	42	2	169-184	All OA; Hybrid	Article	Nilsen, Ann Christin E.; Kalinganire, Charles; Mabeyo, Zena Mnasi; Manyama, William; Ochen, Eric Awich; Revheim, Cecilie; Twikirize, Janestic	Nilsen, Ann Christin E. (Department of Sociology and Social Work, University of Agder, Kristiansand, Norway); Kalinganire, Charles (Department of Social Sciences, School of Governance, Development and Society, College of Arts and Social Sciences, University of Rwanda, Kigali, Rwanda); Mabeyo, Zena Mnasi (Department of Social Work, Institute of Social Work, Dar es Salaam, Tanzania); Manyama, Willi…	Nilsen, Ann Christin E. (University of Agder)	Nilsen, Ann Christin E. (University of Agder); Kalinganire, Charles (University of Rwanda); Mabeyo, Zena Mnasi (Institute of Social Work); Manyama, William (Institute of Social Work); Ochen, Eric Awich (Makerere University); Revheim, Cecilie (University of Agder); Twikirize, Janestic (Makerere University)	7	5		12.22	https://www.tandfonline.com/doi/pdf/10.1080/02615479.2022.2161503	https://app.dimensions.ai/details/publication/pub.1156345906	44 Human Society; 4409 Social Work	4 Quality Education
18	2660	pub.1168615376	10.30574/ijsra.2024.11.1.0182			Educational approaches in African social work: Implications for U.S. social work training	This paper presents a comprehensive exploration of the methodologies in social work education, focusing on the potential integration and synergy between African and U.S. systems. Set against the backdrop of an increasingly globalized world, the study aims to bridge the gap between these two distinct educational paradigms, highlighting the rich diversity and potential for			International Journal of Science and Research Archive				2024-02-28	2024	2024-02-28		11	1	1178-1194	All OA; Hybrid	Article	Adewusi, Ololade Elizabeth; Adediran, Foluke Eyitayo; Okunade, Beatrice Adedayo; Bukola, A; Odulaja; Daraojimba, Rosita Ebere; Igbokwe, Justice Chika	Adewusi, Ololade Elizabeth (); Adediran, Foluke Eyitayo (); Okunade, Beatrice Adedayo (); Bukola, A (); Odulaja (); Daraojimba, Rosita Ebere (); Igbokwe, Justice Chika ()		Adewusi, Ololade Elizabeth (); Adediran, Foluke Eyitayo (); Okunade, Beatrice Adedayo (); Bukola, A (); Odulaja (); Daraojimba, Rosita Ebere (); Igbokwe, Justice Chika ()	1	1			https://ijsra.net/sites/default/files/IJSRA-2024-0182.pdf	https://app.dimensions.ai/details/publication/pub.1168615376	44 Human Society; 4409 Social Work	4 Quality Education
19	2599	pub.1171977245	10.4314/jswds.v6i2.1			Understanding emerging schools of social work in Tanzania through the Ubuntu perspective	The article presents a comprehensive assessment of the emerging social work schools in Tanzania through the Ubuntu perspective. Ubuntu formed the basis of educational pedagogy in pre-colonial Tanzania but colonial rule imported Western social work approaches in the 1940s to replace it. The challenges include fragmented training with an influence of inherited colonial structure, outdated curricula…			Journal of Social Work in Developing Societies				2024-05-22	2024	2024-05-22		6	2	1-12	All OA; Hybrid	Article	Lembuka, Meinrad H	Lembuka, Meinrad H ()		Lembuka, Meinrad H ()	3	3			https://www.ajol.info/index.php/jswds/article/download/271011/255821	https://app.dimensions.ai/details/publication/pub.1171977245	44 Human Society; 4409 Social Work	4 Quality Education
20	2564	pub.1174808227	10.4314/ajsw.v14i2.6			Changing trends of social work curriculum: a study of selected social work institutions in India	The article critically examines the social work curriculum of few selected social work institutions in India. By using the content analysis method, the article analyses the changing trends of social work curriculum in Indian universities. The study found that few selected institutions have incorporated the Indic indigenous components and theories in social work curriculum in line with New Educati…			African Journal of Social Work				2024-02-29	2024	2024-02-29		14	2	100-107	All OA; Gold	Article	Prasad, Sunil; Actovin, Arul; Dash, Bishnu Mohan; Inda, Shyam	Prasad, Sunil (); Actovin, Arul (); Dash, Bishnu Mohan (); Inda, Shyam ()		Prasad, Sunil (); Actovin, Arul (); Dash, Bishnu Mohan (); Inda, Shyam ()	0	0			https://www.ajol.info/index.php/ajsw/article/download/275824/260336	https://app.dimensions.ai/details/publication/pub.1174808227	44 Human Society; 4409 Social Work
21	2518	pub.1188918406	10.4314/jswds.v7i1.3			Critical understanding of emerging schools of social work in Tanzania through Ubuntu perspectives	The article presents a comprehensive assessment of the emerging social work schools in Tanzania (formerly Tanganyika) through the Ubuntu perspective. Ubuntu formed the basis of educational pedagogy in pre-colonial Tanzania relevant to indigenous knowledge and practice but colonial rule imported Western social work approaches in the 1940s to replace it. The challenges include fragmented training w…			Journal of Social Work in Developing Societies				2025-04-28	2025	2025-04-28		7	1	41-53	All OA; Hybrid	Article	Lembuka, Meinrad H.	Lembuka, Meinrad H. ()		Lembuka, Meinrad H. ()	0	0			https://www.ajol.info/index.php/jswds/article/download/294515/277164	https://app.dimensions.ai/details/publication/pub.1188918406	44 Human Society; 4409 Social Work	4 Quality Education
22	2487	pub.1127816628	10.1080/10428232.2020.1762295			Deep Transformation toward Decoloniality in Social Work: Themes for Change in a Social Work Higher Education Program	This article describes thematic outcomes of a process of engagement around deep transformation toward Decoloniality in a university social work education program. Given the gravity of working toward Decoloniality for social work education in South Africa, it was critical to theorize about this process. Current South African realities evidence ongoing structures of Coloniality and Apartheid which …			Journal of Progressive Human Services				2020-05-03	2020	2020-05-22	2020-05-03	31	2	144-164	All OA; Green	Article	Smith, Linda Harms; Rasool, Shahana	Smith, Linda Harms (School of Applied Social Studies, Social Work, Robert Gordon University, Aberdeen, Scotland; Research Associate, University of Johannesburg, Johannesburg, South Africa); Rasool, Shahana (University of Johannesburg, Johannesburg, South Africa)	Smith, Linda Harms (Robert Gordon University; University of Johannesburg)	Smith, Linda Harms (Robert Gordon University; University of Johannesburg); Rasool, Shahana (University of Johannesburg)	17	5		7.57	https://rgu-repository.worktribe.com/preview/936647/HARMS%20SMITH%202020%20Deep%20transformation.pdf	https://app.dimensions.ai/details/publication/pub.1127816628	44 Human Society; 4409 Social Work	4 Quality Education
23	2483	pub.1155315996	10.22329/csw.v24i1.7853			Centering Anti-Racism in Social Work Education: Integration of Critical Race Theory Across an MSW Curriculum	Ranging from a multicultural approach to models of cultural sensitivity and cultural competency, social work education has historically avoided challenging the power of racism in shaping inequity in the United States. We argue that integrating critical race theory (CRT) in social work education decenters whiteness, counters color-evasive racism in education, and centers anti-racist ideas and prac…			Critical Social Work				2023-01-31	2023	2023-01-31		24	1		All OA; Gold	Article	Aldana, Adriana; Vazquez, Nicole; Hosea, Taylor	Aldana, Adriana (California State University, Dominguez Hills); Vazquez, Nicole (Vazquez Consulting); Hosea, Taylor (California State University, Dominguez Hills)		Aldana, Adriana (California State University, Dominguez Hills); Vazquez, Nicole (Vazquez Consulting); Hosea, Taylor (California State University, Dominguez Hills)	4	3		6.98	https://ojs.uwindsor.ca/index.php/csw/article/download/7853/5495	https://app.dimensions.ai/details/publication/pub.1155315996	44 Human Society; 4409 Social Work	4 Quality Education
24	2478	pub.1008330952	10.1177/0020872815606792			Exploring military social work from a social justice perspective	Calls to enhance military social work content in social work education present unique challenges for a discipline historically associated with social justice and advocacy for peace. The consequences of war demand intervention along multiple psychosocial domains. However, the question remains as to how social workers can address the discrepancies between social work values and military culture. Th…			International Social Work				2015-12-04	2015	2015-12-04	2018-01	61	1	119-129	All OA; Bronze	Article	Olson, Mark D	Olson, Mark D (Illinois State University, USA)	Olson, Mark D (Illinois State University)	Olson, Mark D (Illinois State University)	10	1		2.78	https://journals.sagepub.com/doi/pdf/10.1177/0020872815606792	https://app.dimensions.ai/details/publication/pub.1008330952	44 Human Society; 4409 Social Work	16 Peace, Justice and Strong Institutions
25	2463	pub.1190596324	10.31265/jcsw.v20i1.730			Engaged Scholarship through Community Social Labs: Advancing Indigenisation of Social Work Education in Uganda	The indigenisation of social work education in Africa is a response to the limitations of Western-centric approaches to addressing complex local social issues. This paper explores the role of engaged scholarship and community social labs in indigenising social work education in Uganda. The study analyses data from four focus group discussions, and student WhatsApp conversations, to examine how th…			Journal of Comparative Social Work				2025-07-08	2025	2025-07-08		20	1	79-109	All OA; Gold	Article	Opobo, Timothy; Abalo, Jannette; Kafuko, Agatha; Twikirize, Janestic; Ocen, Eric Awich; Mugumya, Firminus	Opobo, Timothy (); Abalo, Jannette (); Kafuko, Agatha (); Twikirize, Janestic (); Ocen, Eric Awich (); Mugumya, Firminus ()		Opobo, Timothy (); Abalo, Jannette (); Kafuko, Agatha (); Twikirize, Janestic (); Ocen, Eric Awich (); Mugumya, Firminus ()	0	0			https://journals.uis.no/index.php/JCSW/article/download/730/473	https://app.dimensions.ai/details/publication/pub.1190596324	44 Human Society; 4409 Social Work	4 Quality Education
26	2451	pub.1128838779	10.20896/saci.v8i1.773			Indigenous or Blended Model for South Asian Social Work?	An argument about indigenous social work education often surfaces in South Asian schools of social work. In this study, central concerns around the indigenous argument, together with a review of the pervasive influence of the western model of social work in Asia is undertaken. The three author- research team, utilised a methodology that featured a desk review and an analysis of communications wit…			Space and Culture India				2020-06-29	2020	2020-06-29		8	1	40-58	All OA; Gold	Article	Pulla, Venkat Rao; Das, Tulshi Kumar; Nikku, Bala Raju	Pulla, Venkat Rao (Foundation Professor, Brisbane Institute of Strengths Based Practice and Adjunct Senior Research Fellow Institute for Land Water and Society, Charles Sturt University, Albury-Wodonga , NSW, 2640); Das, Tulshi Kumar (Professor, Department of Social Work, Shahjalal University of Science & Technology, Sylhet, Bangladesh); Nikku, Bala Raju (Assistant Professor, School of Social Wor…		Pulla, Venkat Rao (Charles Sturt University); Das, Tulshi Kumar (Shahjalal University of Science and Technology); Nikku, Bala Raju (Thompson Rivers University)	10	1		4.46	https://spaceandculture.in/index.php/spaceandculture/article/download/773/390	https://app.dimensions.ai/details/publication/pub.1128838779	44 Human Society; 4409 Social Work	4 Quality Education
27	2446	pub.1145406950	10.1093/bjsw/bcac028			Making the ‘Local’ Visible in Social Work Education: Insights from Nigeria and Scotland on (Re)balancing and Contextualising Indigenous and International Knowledge	Abstract Social work in the twenty-first century is maturing as a global profession. This comparative study offers an original contribution to the evolving discussion in the field of international social work. The paper makes visible the socio-spatial dimensions and contested interpretations of international and indigenous knowledge through the experiences of social work students in the Global So…	The authors extend thanks to all the students who took the time to share their experiences and make this study possible.	This project received University of Dundee seed funding.	The British Journal of Social Work				2022-02-19	2022	2022-02-19	2022-10-20	52	7	4299-4317	All OA; Hybrid	Article	Levy, Susan; Okoye, Uzoma O; Ingram, Richard	Levy, Susan (School of Education and Social Work, University of Dundee, Nethergate, Dundee DL1 4HN, UK); Okoye, Uzoma O (Department of Social Work, Faculty of Social Sciences, University of Nigeria, Nsuka, Enugu State 410002, Nigeria); Ingram, Richard (School of Education and Social Work, University of Dundee, Nethergate, Dundee DL1 4HN, UK)	Levy, Susan (University of Dundee)	Levy, Susan (University of Dundee); Okoye, Uzoma O (University of Nigeria); Ingram, Richard (University of Dundee)	18	10		20.29	https://academic.oup.com/bjsw/article-pdf/52/7/4299/46578777/bcac028.pdf	https://app.dimensions.ai/details/publication/pub.1145406950	44 Human Society; 4409 Social Work	4 Quality Education
28	2394	pub.1086062033	10.1080/02615479.2017.1335299			Teaching research methods to social work students in India and Australia: reflections and recommendations	This paper draws on the reflections of two social work educators who have, for many years taught research methods to undergraduate and postgraduate social work students in India and Australia. The intent is to suggest measures for enhancing the quality of social work research education. The reflections are embedded in a social justice and human rights framework, privileging the educators’ unique …			Social Work Education				2017-06-15	2017	2017-06-15	2017-08-18	36	6	690-701	All OA; Green	Article	Ponnuswami, Ilango; Harris, Nonie	Ponnuswami, Ilango (Faculty of Arts, Department of Social Work, Bharathidasan University, Khajamalai Campus, Tiruchirappalli, India); Harris, Nonie (Social Work and Human Services, College of Arts, Society and Education, James Cook University, Townsville, Australia)	Harris, Nonie (James Cook University)	Ponnuswami, Ilango (Bharathidasan University); Harris, Nonie (James Cook University)	5	0		1.73	https://researchonline.jcu.edu.au/49476/16/49476_Ponnuswami%20and%20Harris_2017_accepted%20version.pdf	https://app.dimensions.ai/details/publication/pub.1086062033	39 Education; 3903 Education Systems; 44 Human Society; 4409 Social Work	4 Quality Education
29	2382	pub.1085701191	10.1093/bjsw/bcx053			Cultural Responsiveness in Action: Co-Constructing Social Work Curriculum Resources with Aboriginal Communities	Aboriginal and Torres Strait Islander ways of knowing, being and doing have recently become core social work curriculum in Australian social work degrees and are regarded as central to decolonising Australian social work education and producing culturally responsive social work practitioners. Effectively teaching these knowledges, values and skills requires multiple strategies including the devel…	The authors acknowledge the contribution of all stakeholders in the development of these resources. We acknowledge Aboriginal and Torres Strait Islander communities who took part in the consultation process and thank them for their shared wisdom. We also acknowledge the Faculty of Health Sciences, Australian Catholic University, who provided funding that made this project possible.		The British Journal of Social Work				2017-06-14	2017	2017-06-14	2018-04-01	48	3	808-825	All OA; Hybrid	Article	Bennett, Bindi; Redfern, Helen; Zubrzycki, Joanna	Bennett, Bindi (School of Allied Health, Australian Catholic University, Australia); Redfern, Helen (School of Allied Health, Australian Catholic University, Australia); Zubrzycki, Joanna (School of Allied Health, Australian Catholic University, Australia)	Zubrzycki, Joanna (Australian Catholic University)	Bennett, Bindi (Australian Catholic University); Redfern, Helen (Australian Catholic University); Zubrzycki, Joanna (Australian Catholic University)	66	20		21.7	https://academic.oup.com/bjsw/article-pdf/48/3/808/24767335/bcx053.pdf	https://app.dimensions.ai/details/publication/pub.1085701191	44 Human Society; 4409 Social Work
30	2361	pub.1170846368	10.4236/ce.2024.154033			The Natural Environment in Social Work Curriculum: A Narrative Reflection of Teaching-Learning through a Sustainability Course Design and Delivery	This paper aims to narrate the author’s journey about a newly designed course called, Social Work and Sustainability offered at the beginning of social work education, which she used to develop and improve a learning material to enhance her teaching. It is a narrative reflection centered on class observations (from 2016 to 2019) and integrates a discussion of research related to sustainability in…	I acknowledge my African ancestors, people, and communities in and outside the African continent for the victories, successes, and harmony they have contributed to humanity and the natural world for centuries.		Creative Education				2024-04-10	2024	2024-04-10	2024	15	04	543-569	All OA; Gold	Article	Somnoma, Valerie Ouedraogo	Somnoma, Valerie Ouedraogo (Faculty of Health and Community Studies, School of Social Work, MacEwan University, Edmonton, Canada)		Somnoma, Valerie Ouedraogo (MacEwan University)	0	0			http://www.scirp.org/journal/PaperDownload.aspx?paperID=132537	https://app.dimensions.ai/details/publication/pub.1170846368	39 Education; 3903 Education Systems; 44 Human Society; 4409 Social Work	4 Quality Education
31	2336	pub.1063957429	10.1177/1077559511436211	22353672	PMC3814165	Disseminating Child Maltreatment Interventions				Child Maltreatment			Behavioral Research; Child; Child Abuse; Evidence-Based Medicine; Family; Humans; Program Development	2012-02-20	2012	2012-02-20	2012-02	17	1	5-10	All OA; Green	Article	Self-Brown, Shannon; Whitaker, Daniel; Berliner, Lucy; Kolko, David	Self-Brown, Shannon (Georgia State University, Atlanta, GA, USA); Whitaker, Daniel (Georgia State University, Atlanta, GA, USA); Berliner, Lucy (Harborview Medical Center, University of Washington, Seattle, WA, USA); Kolko, David (Western Psychiatric Institute and Clinic, University of Pittsburgh School of Medicine, Pittsburgh, PA, USA)	Self-Brown, Shannon (Georgia State University)	Self-Brown, Shannon (Georgia State University); Whitaker, Daniel (Georgia State University); Berliner, Lucy (University of Washington; Harborview Medical Center); Kolko, David (University of Pittsburgh)	32	1	0.97	6.11	https://www.ncbi.nlm.nih.gov/pmc/articles/3814165	https://app.dimensions.ai/details/publication/pub.1063957429	44 Human Society; 4402 Criminology; 4409 Social Work; 52 Psychology; 5201 Applied and Developmental Psychology
32	2264	pub.1147932311	10.1177/15248380221097442	35577560		Trauma Aware and Anti-Oppressive Arts-Health and Community Arts Practice: Guiding Principles for Facilitating Healing, Health and Wellbeing	There is a growing call for arts-health and community arts professionals to work in 'trauma informed ways' to prevent re-traumatisation and promote healing. This paper reports on a scoping review of existing literature that deal with trauma aware and informed practice and its applications in arts-health and community arts. Trauma informed practice does not seek to target or treat trauma but, rath…		FundingThe author(s) disclosed receipt of the following financial support for the research, authorship, and/or publication of this article: This work has been supported in part by Australian Research Council Indigenous Discovery Project number IN210100044.	Trauma Violence & Abuse			Humans; Mental Disorders; Surveys and Questionnaires	2022-05-16	2022	2022-05-16	2023-10	24	4	2429-2447	All OA; Green	Article	Sunderland, Naomi; Stevens, Fiona; Knudsen, Kate; Cooper, Rae; Wobcke, Marianne	Sunderland, Naomi (School of Health Sciences and Social Work, Griffith University, Australia; Creative Arts Research Institute, Griffith University, Australia; Indigenous Research Unit, Griffith University, Australia); Stevens, Fiona (School of Health Sciences and Social Work, Griffith University, Australia); Knudsen, Kate (School of Medicine, Griffith University, Australia); Cooper, Rae (Creativ…	Sunderland, Naomi (Griffith University; Griffith University; Griffith University)	Sunderland, Naomi (Griffith University; Griffith University; Griffith University); Stevens, Fiona (Griffith University); Knudsen, Kate (Griffith University); Cooper, Rae (Griffith University; Griffith University; Griffith University); Wobcke, Marianne (Griffith University; Griffith University; Griffith University)	13	12	0.69	14.65	https://research-repository.griffith.edu.au/bitstreams/49f55cd1-03ef-4b8f-8bda-12920e545038/download	https://app.dimensions.ai/details/publication/pub.1147932311	44 Human Society; 4409 Social Work
33	2252	pub.1157844753	10.1080/0312407x.2023.2203116			Indigenisation, (De)Colonisation, and Whiteness: Dismantling Social Work Education	Education and knowledge sharing has a long and rich history within Australia prior to, and since invasion. Aboriginal and Torres Strait Islander peoples have always been committed to truth telling and ways of knowing, being, and doing. The process of decolonisation through the implementation of Aboriginal and Torres Strait Islander knowledges and pedagogy is an ongoing commitment in higher educat…	The authors of this article wish to acknowledge the traditional owners of the lands on which we both live, work, and learn, the Wadawurrung people of the Kulin Nation, and pay our respects to their Elders past, present, and emerging. In doing so, we wish to acknowledge the rich and continuing cultures, and that sovereignty of these lands and waterways was never ceded. Through reflecting on what i…		Australian Social Work				2023-05-07	2023	2023-05-07	2023-07-03	76	3	300-314	All OA; Bronze	Article	Ryan, Joleen; Ivelja, Jesse	Ryan, Joleen (National Indigenous Knowledges Education Research, Innovation (NIKERI) Institute, Deakin University, Geelong, Victoria, Australia); Ivelja, Jesse (National Indigenous Knowledges Education Research, Innovation (NIKERI) Institute, Deakin University, Geelong, Victoria, Australia)	Ivelja, Jesse (Deakin University)	Ryan, Joleen (Deakin University); Ivelja, Jesse (Deakin University)	9	8		15.72	https://www.tandfonline.com/doi/pdf/10.1080/0312407X.2023.2203116?needAccess=true&role=button	https://app.dimensions.ai/details/publication/pub.1157844753	44 Human Society; 4409 Social Work	4 Quality Education
34	2217	pub.1172706281	10.23865/ntpk.v10.5881			Repositioning Power Relations in Indigenous Social Work Education	In this article, we present the history of social work education in Greenland, from a professional training school in 1985 to a university BA-level education in 2008 and onwards to the present day. Mainly, we discuss how the education of Greenlandic social workers continually reflects on the decolonising elements of the curriculum. The latest step in this process has been the development of a new…			Nordisk tidsskrift for pedagogikk og kritikk				2024-06-11	2024	2024-06-11		10	3		All OA; Gold	Article	Jensen, Bonnie; Arnfjord, Steven	Jensen, Bonnie (University of Greenland, Greenland); Arnfjord, Steven (University of Greenland, Greenland)		Jensen, Bonnie (University of Greenland); Arnfjord, Steven (University of Greenland)	1	1			https://pedagogikkogkritikk.no/index.php/ntpk/article/download/5881/10079	https://app.dimensions.ai/details/publication/pub.1172706281	39 Education; 3901 Curriculum and Pedagogy; 44 Human Society; 4409 Social Work	4 Quality Education
35	2214	pub.1137941213	10.1093/bjsw/bcab110			Integration of the Disaster Component into Social Work Curriculum: Teaching Undergraduate Social Work Research Methods Course during COVID-19	Abstract This article aims to develop community-contextualised pedagogical innovations to embed disaster components into core social work curriculum through a research methods course. Professional social work education continues to lack a community-contextualised curriculum and professional training that reflects the complexities of extreme events associated with community and human service. This…	The author would like to thank Amy Chow and Reima Ana Maglajlic for their editorial leadership, the journal’s peer reviewers for their thoughtful comments that helped to improve this article, and Merlinda Weinberg for her careful review of earlier drafts of this article.	This study was undertaken, in part, thanks to funding from the Canada Research Chairs Program.	The British Journal of Social Work				2021-07-27	2021	2021-07-27	2021-07-28	51	5	1799-1819	All OA; Hybrid	Article	Wu, Haorui	Wu, Haorui (School of Social Work, Dalhousie University, Halifax, NS B3H 4R2, Canada; Natural Hazards Center, Institute of Behavioral Science, University of Colorado Boulder, Boulder, CO 80309, USA)	Wu, Haorui (Dalhousie University; University of Colorado Boulder)	Wu, Haorui (Dalhousie University; University of Colorado Boulder)	21	8		12.91	https://academic.oup.com/bjsw/article-pdf/51/5/1799/39770897/bcab110.pdf	https://app.dimensions.ai/details/publication/pub.1137941213	44 Human Society; 4409 Social Work	11 Sustainable Cities and Communities
36	2212	pub.1112766280	10.1080/02615479.2019.1584176			How is ‘racism’ understood in literature about black and minority ethnic social work students in Britain? A conceptual review	This conceptual review interrogates a body of literature concerned with black and minority ethnic (BME) social work students in Britain since 2008. This period has coincided with an increasing focus on diversity in Higher Education, but also lower prominence being given to race in social work. In social work education, there has been increased attention to the needs and experiences of BME student…			Social Work Education				2019-03-14	2019	2019-03-14	2019-07-04	38	5	563-575	All OA; Green	Article	Jeyasingham, Dharman; Morton, Julie	Jeyasingham, Dharman (School of Health Sciences, University of Manchester, Manchester, England); Morton, Julie (School of Health and Society, University of Salford, Salford, England)	Jeyasingham, Dharman (University of Manchester)	Jeyasingham, Dharman (University of Manchester); Morton, Julie (University of Salford)	16	4		5.27	http://usir.salford.ac.uk/id/eprint/50038/3/J%20Morton%20Accepted%20version%20Word%5B1%5D.pdf	https://app.dimensions.ai/details/publication/pub.1112766280	39 Education; 3904 Specialist Studies In Education; 44 Human Society; 4409 Social Work	4 Quality Education
37	2202	pub.1168403692	10.18060/27152			Conceptualizing Anti-Racist Social Work Pedagogy: Practical Ideas for Increasing Faculty Capacity, Reflexivity, and Ability	Studies have suggested that faculty in higher education lack the preparation, training, tools, and collaboration to be effective anti-racist educators. This conceptual paper presents a new framework for social work faculty to consider as they evolve their anti-racist pedagogy. The history of the priorities and professionalization of social work is explored along with the origins and theoretical i…			Advances in Social Work				2024-01-30	2024	2024-01-30		23	2	295-316	All OA; Gold	Article	Buzard, Allison	Buzard, Allison (Trevecca Nazarene University Department of Social Work)		Buzard, Allison (Trevecca Nazarene University)	2	2			https://journals.iupui.edu/index.php/advancesinsocialwork/article/download/27152/25410	https://app.dimensions.ai/details/publication/pub.1168403692	44 Human Society; 4409 Social Work	4 Quality Education
38	2177	pub.1168405921	10.18060/24989			Lessons Learned from the CSWE Task Force to Advance Anti-Racism in the Social Work Education Policy and Accreditation Standards: : Praxis in a Racially Volatile Society	On May 25, 2020, Mr. George Floyd, a Black man, was murdered by Derek Chauvin, a White police officer in Minneapolis, Minnesota. In response to this disgusting display of police brutality, thousands of people all over the world began protesting Mr. Floyd’s killing. The Capital of the Confederacy, Richmond, Virginia, became one of many flashpoints for the public’s rage against white supremacy and …			Advances in Social Work				2024-01-30	2024	2024-01-30		23	2	262-277	All OA; Gold	Article	Fairfax, Colita Nichols; Rountree, Michele; Murray-Lichtman, Andrea; Moore, Rebecca Maldonado; Bird, Michael Yellow; Albritton, Travis; Naseh, Mitra; Izaksonas, Elena; Williams, Tauchiana	Fairfax, Colita Nichols (Norfolk State University); Rountree, Michele (); Murray-Lichtman, Andrea (); Moore, Rebecca Maldonado (); Bird, Michael Yellow (); Albritton, Travis (); Naseh, Mitra (); Izaksonas, Elena (); Williams, Tauchiana ()		Fairfax, Colita Nichols (Norfolk State University); Rountree, Michele (); Murray-Lichtman, Andrea (); Moore, Rebecca Maldonado (); Bird, Michael Yellow (); Albritton, Travis (); Naseh, Mitra (); Izaksonas, Elena (); Williams, Tauchiana ()	4	4			https://journals.iupui.edu/index.php/advancesinsocialwork/article/download/24989/25409	https://app.dimensions.ai/details/publication/pub.1168405921	44 Human Society; 4402 Criminology; 4409 Social Work	16 Peace, Justice and Strong Institutions; 4 Quality Education
39	2172	pub.1136855838	10.1080/21681392.2021.1886136			Towards decoloniality in a social work programme: a process of dialogue, reflexivity, action and change	Both students and scholars have identified the critical imperative to prioritize decolonization and pedagogical and curriculum transformation in South African higher education institutions. The ongoing context of coloniality, persistent race-based inequalities and hegemonic Western-centric epistemologies led to the Rhodes and Fees Must Fall protests by students at South African universities. As a…	The authors would like to acknowledge the contribution of the team of social work educators in the Department of Social Work at the University of Johannesburg, including (alphabetically) Sue Bond; Marlene de Beer; Kefilwe Ditlhake; Ntandoyenkosi Maphosa; Boipuso Mashigo; Varosh Nadesan; Sarojini Naidoo; Mpumi Ncube; Hanna Nel; Tanusha Raniga; Shahana Rasool; Mzwandile Sobantu; Yasmin Turton; Adri…	This work was supported by University of Johannesburg: [grant number 05.05.205605.25].	Critical African Studies				2021-01-02	2021	2021-04-01	2021-01-02	13	1	56-72	All OA; Green	Article	Rasool, Shahana; Harms-Smith, Linda	Rasool, Shahana (Department of Social Work and Community Development, University of Johannesburg, Johannesburg, South Africa); Harms-Smith, Linda (Department of Social Work and Community Development, University of Johannesburg, Johannesburg, South Africa; Department of Social Work, Robert Gordon University, Aberdeen, Scotland)	Rasool, Shahana (University of Johannesburg); Harms-Smith, Linda (University of Johannesburg; Robert Gordon University)	Rasool, Shahana (University of Johannesburg); Harms-Smith, Linda (University of Johannesburg; Robert Gordon University)	19	10		11.68	https://rgu-repository.worktribe.com/preview/1308989/RASOOL%202021%20Towards%20decoloniality.pdf	https://app.dimensions.ai/details/publication/pub.1136855838	44 Human Society; 4409 Social Work
40	2169	pub.1007813649	10.1177/0020872816681260			Editorial				International Social Work				2016-12-28	2016	2016-12-28	2017-01	60	1	3-5	All OA; Bronze	Article	Ioakimidis, Vasilios; Dominelli, Lena	Ioakimidis, Vasilios (); Dominelli, Lena ()		Ioakimidis, Vasilios (); Dominelli, Lena ()	0	0		0	https://journals.sagepub.com/doi/pdf/10.1177/0020872816681260	https://app.dimensions.ai/details/publication/pub.1007813649	44 Human Society; 4409 Social Work
41	2143	pub.1163826778	10.1177/00208728231196366			The state of eco-social work training in Canada: Transformative praxis for climate constrained futures	As climate disasters increase, social workers will increasingly be called upon to help communities with the related dislocations, eco-anxieties, and social transformations. This article explores the extent to which Canadian social work schools are preparing social workers to advance socio-ecological justice. It examines the coursework in these programmes as new standards come into effect in 2023.…		Funding The authors disclosed receipt of the following financial support for the research, authorship and/or publication of this article: The Canada Research Chairs Program, jointly administered through the Government of Canada’s Tri-Council funding agencies.	International Social Work				2023-09-04	2023	2023-09-04	2024-07	67	4	905-921	All OA; Hybrid	Article	Smith-Carrier, Tracy; MacArthur, Julie	Smith-Carrier, Tracy (Royal Roads University, Canada); MacArthur, Julie (Royal Roads University, Canada)	Smith-Carrier, Tracy (Royal Roads University)	Smith-Carrier, Tracy (Royal Roads University); MacArthur, Julie (Royal Roads University)	6	6		10.48	https://journals.sagepub.com/doi/pdf/10.1177/00208728231196366	https://app.dimensions.ai/details/publication/pub.1163826778	44 Human Society; 4409 Social Work	13 Climate Action
42	2116	pub.1103958037	10.1177/0020872818774107			Reclaiming international social work in the context of the Global Agenda for Social Work and Social Development: Some critical reflections	The protection of human rights and the promotion of social justice is a shared spirit manifested within all social work. Islands of local concern are directly affected by global stresses and inequalities, and the Global Agenda for Social Work and Social Development has created a space for repositioning social work globally in addressing these challenges. This article opens up definitions and exam…		Funding The author(s) received no financial support for the research, authorship and/or publication of this article.	International Social Work				2018-05-11	2018	2018-05-11	2019-05	62	3	1043-1054	All OA; Green	Article	Palattiyil, George; Sidhva, Dina; Pawar, Manohar; Shajahan, PK; Cox, James; Anand, Janet C	Palattiyil, George (The University of Edinburgh, UK); Sidhva, Dina (University of the West of Scotland, UK); Pawar, Manohar (Charles Sturt University, Australia); Shajahan, PK (Tata Institute of Social Sciences, India); Cox, James (Independent Social Worker and Practice Educator, UK); Anand, Janet C (University of Eastern Finland, Finland)	Palattiyil, George (University of Edinburgh)	Palattiyil, George (University of Edinburgh); Sidhva, Dina (University of the West of Scotland); Pawar, Manohar (Charles Sturt University); Shajahan, PK (Tata Institute of Social Sciences); Cox, James (Independent Social Worker and Practice Educator, UK); Anand, Janet C (University of Eastern Finland)	26	6		9.79	https://myresearchspace.uws.ac.uk/ws/files/53344090/2018_04_05_Sidhva_Reclaiming.pdf	https://app.dimensions.ai/details/publication/pub.1103958037	44 Human Society; 4409 Social Work	16 Peace, Justice and Strong Institutions; 4 Quality Education
43	2111	pub.1172450691	10.1007/s10615-024-00938-x			Enhancing Equity in Clinical Social Work Education: Supporting Indigenous Queer and Gender Diverse Students and Researchers	For Indigenous Australian Queer and Gender Diverse (QGD) Peoples, being acknowledged, recognised, and considered in frameworks, policies, and within organisations in the broader Australian context is rare. This article will explore some of the structures, systems, and policies that impact on Indigenous QGD peoples in Higher Education (HE). We will speak on social and emotional wellbeing (SEWB) an…	The authors would like to acknowledge this chapter has been written on the unceded sovereign lands of the Jinibara Peoples and the Wijabul Wia-bul Peoples of the Bundjalung Nations of Australia, the Palawa Peoples of Lutruwita, the Gimuy-walubarra yidi and Yirrganydji lands and People of Gimuy, the Wurundjeri Peoples of the Kulin Nation. We pay respect to their Elders, past and present and to the…	Open Access funding enabled and organized by CAUL and its Member Institutions Open Access funding enabled and organized by CAUL and its Member Institutions.	Clinical Social Work Journal				2024-06-03	2024	2024-06-03	2025-03	53	1	43-57	All OA; Hybrid	Article	Phelan, Péta; Meyers, Olivia; Mcalear, Shai; Evans, Jen; Menzel, Kelly; Bennett, Bindi	Phelan, Péta (Department of Psychology, Counselling, and Therapy, School of Psychology and Public Health, La Trobe University, 3086, Bundoora, VIC, Australia); Meyers, Olivia (National Centre for Reconciliation, Truth and Justice, Federation University, Ballarat, Victoria, Australia); Mcalear, Shai (Department of Psychology, Counselling, and Therapy, School of Psychology and Public Health, La Tro…	Phelan, Péta (La Trobe University)	Phelan, Péta (La Trobe University); Meyers, Olivia (Federation University); Mcalear, Shai (La Trobe University); Evans, Jen (University of Tasmania); Menzel, Kelly (Southern Cross University); Bennett, Bindi (Federation University)	0	0			https://link.springer.com/content/pdf/10.1007/s10615-024-00938-x.pdf	https://app.dimensions.ai/details/publication/pub.1172450691	44 Human Society; 4405 Gender Studies; 4409 Social Work	4 Quality Education
44	2086	pub.1157343313	10.15270/59-1-1097			SOCIAL WORK EDUCATORS’ PERCEPTIONS OF THE IMPORTANCE AND RELEVANCE OF ENVIRONMENTAL SOCIAL WORK	It is well known that the effects of climate change and especially environmental inequality are amplified for people who live in poverty or who are marginalised. Social workers internationally and nationally are therefore becoming duty-bound to engage with the issue of environmental social work. This qualitative study used a descriptive design to explore and describe the perceptions of social wor…			Social Work/Maatskaplike Werk				2023	2023	2023	2023	59	1	129-151	All OA; Gold	Article	Arkert, Linda; Jacobs, Issie	Arkert, Linda (North-West University); Jacobs, Issie (North-West University)		Arkert, Linda (North-West University); Jacobs, Issie (North-West University)	9	9		15.72	https://socialwork.journals.ac.za/pub/article/view/1097/955	https://app.dimensions.ai/details/publication/pub.1157343313	44 Human Society; 4409 Social Work
45	2079	pub.1044180651	10.1080/13691457.2014.925849			Problematising international placements as a site of intercultural learning	This paper theorises some of the learning outcomes of a three-year project concerning student learning in international social work placements in Malaysia. The problematic issue of promoting cultural and intercultural competence through such placements is examined, where overlapping hegemonies are discussed in terms of isomorphism of social work models, that of the nation state, together with tho…	We gratefully acknowledge three-year British Council funding under ISM – 245, PMI2 Strategic Alliances and Partnerships project, International Mobility of UK Students strand. We take responsibility for the opinions and analysis reported within the paper.		European Journal of Social Work				2014-06-13	2014	2014-06-13	2015-05-27	18	3	383-396	All OA; Green	Article	Parker, Jonathan; Crabtree, Sara Ashencaen; Azman, Azlinda; Carlo, Dolly Paul; Cutler, Clare	Parker, Jonathan (School of Health & Social Care, Bournemouth University, Bournemouth, UK); Crabtree, Sara Ashencaen (School of Health & Social Care, Bournemouth University, Bournemouth, UK); Azman, Azlinda (School of Social Sciences, Universiti Sains Malaysia, Penang, Malaysia); Carlo, Dolly Paul (Social Work, Univesiti Malasia Sarawak (UNIMAS), Sarawak, Malaysia); Cutler, Clare (Bournemouth Uni…	Parker, Jonathan (Bournemouth University)	Parker, Jonathan (Bournemouth University); Crabtree, Sara Ashencaen (Bournemouth University); Azman, Azlinda (Universiti Sains Malaysia); Carlo, Dolly Paul (Universiti Malaysia Sarawak); Cutler, Clare (Bournemouth University)	15	2		4.06	http://ir.unimas.my/id/eprint/8434/1/Problematising%20international%20social%20work%20placements%20as%20a%20site%20of%20intercultural%20learning.%20-%20Copy.pdf	https://app.dimensions.ai/details/publication/pub.1044180651	44 Human Society; 4409 Social Work
46	2079	pub.1151645067	10.22329/csw.v23i1.7586			If Not Now, When? A Call to End Social Work’s Tolerance of White Supremacy in the Academy	Despite ethical responsibilities to dismantle systems of oppression, White supremacy ideologies and practices are still inundated in social work academe to the detriment of Black, Indigenous, Latino, and Persons of Color (BILPOC) communities and faculty dedicated to teaching the next generation of critical scholars, activists, and clinicians. Four themes are introduced to exemplify how the academ…			Critical Social Work				2022-09-22	2022	2022-09-22		23	1		All OA; Gold	Article	Garcia, Antonio; Barnhart, Sheila; Pope, Natalie; Showalter, Kathryn; Trinadad, Alma Ouanesisouk	Garcia, Antonio (University of Kentucky); Barnhart, Sheila (University of Kentucky); Pope, Natalie (University of Kentucky); Showalter, Kathryn (University of Kentucky); Trinadad, Alma Ouanesisouk (Portland State University)		Garcia, Antonio (University of Kentucky); Barnhart, Sheila (University of Kentucky); Pope, Natalie (University of Kentucky); Showalter, Kathryn (University of Kentucky); Trinadad, Alma Ouanesisouk (Portland State University)	3	3		3.38	https://ojs.uwindsor.ca/index.php/csw/article/download/7586/5461	https://app.dimensions.ai/details/publication/pub.1151645067	44 Human Society; 4409 Social Work
47	2030	pub.1168718495	10.14426/cristal.v9i1.1841			The phenomenology of colonialism: Exploring perspectives of social work graduates in the African university	This article unpacks African students’ understanding of colonialism in higher education through the narratives of social work graduates who attended a university located in KwaZulu-Natal. The research study is inspired by the 2015/2016 #RhodesMustFall and #FeesMustFall movements, which suggested a need to explore students’ views regarding colonialism in higher education. The data was collected th…			Critical Studies in Teaching and Learning				2021	2021	2021		9	1		All OA; Gold	Article	Makhanya, Thembelihle	Makhanya, Thembelihle (University of Kwa-Zulu Natal)		Makhanya, Thembelihle (University of KwaZulu-Natal)	5	5		3.23	https://epubs.ac.za/index.php/cristal/article/download/1841/1337	https://app.dimensions.ai/details/publication/pub.1168718495	39 Education; 3902 Education Policy, Sociology and Philosophy; 3903 Education Systems; 44 Human Society; 4409 Social Work	4 Quality Education
48	2017	pub.1152922229	10.1080/02615479.2022.2147157			On the other side of the rabbit proof fence: decolonizing social work education - a framework for change	The push to improve Indigenous student retention and completion rates in higher education programs is a strategic goal across Australian universities. Similarly, the notion of decolonizing education to allow for a more culturally relevant educational experience is being discussed in university curricula development. In this article, we highlight challenges within the current neoliberal political …			Social Work Education				2022-11-21	2022	2022-11-21	2024-05-18	43	4	862-878	All OA; Hybrid	Article	Moss, Michelle; Rowen, Roslyn; Lee, Anthony Duwun	Moss, Michelle (College of Health and Human Sciences, Charles Darwin University, Darwin, Northern Territory, Australia); Rowen, Roslyn (Batchelor Institute of Indigenous Tertiary Education, Darwin, Northern Territory, Australia); Lee, Anthony Duwun (College of Health and Human Sciences, Charles Darwin University, Darwin, Northern Territory, Australia)	Moss, Michelle (Charles Darwin University)	Moss, Michelle (Charles Darwin University); Rowen, Roslyn (Batchelor Institute of Indigenous Tertiary Education); Lee, Anthony Duwun (Charles Darwin University)	7	6		5.81	https://doi.org/10.1080/02615479.2022.2147157	https://app.dimensions.ai/details/publication/pub.1152922229	39 Education; 3902 Education Policy, Sociology and Philosophy; 3903 Education Systems; 3904 Specialist Studies In Education; 44 Human Society; 4409 Social Work	4 Quality Education
49	2015	pub.1174577089	10.1080/02615479.2024.2383228			Human rights integration in Ethiopian social work education: a study on curricula and students’ understandings	Focusing on the integration of human rights into the Ethiopian Bachelor of Social Work programme, this paper presents a study of students’ understanding of human rights by employing a mixed-methods research design. Qualitative content analysis and survey study were utilized to assess the extent of human rights infusion into the undergraduate curriculum and examine students’ understanding of human…		The work was supported by the Open Society Foundations [German Academic Exchange Service (DAAD)].	Social Work Education				2024-08-07	2024	2024-08-07		ahead-of-print	ahead-of-print	1-21	All OA; Hybrid	Article	Bitew, Endeshaw Aynetu; Stamm, Ingo	Bitew, Endeshaw Aynetu (Department of Social Work, College of Social Sciences and Humanities, University of Gondar, Gondar, Ethiopia); Stamm, Ingo (Kokkola University Consortium Chydenius, University of Jyväskylä, Jyväskylä, Finland)	Stamm, Ingo (University of Jyväskylä)	Bitew, Endeshaw Aynetu (University of Gondar); Stamm, Ingo (University of Jyväskylä)	0	0			https://www.tandfonline.com/doi/pdf/10.1080/02615479.2024.2383228?needAccess=true	https://app.dimensions.ai/details/publication/pub.1174577089	44 Human Society; 4409 Social Work	4 Quality Education
50	2010	pub.1146289308	10.1080/02615479.2022.2052039			The contribution of Western pedagogy and knowledge in the development of social work education in Nigeria: a coin of two sides	Historically, the development of social work education in most African countries has been strongly influenced by and modeled upon Western knowledge and pedagogy. Social work education has not been the product of a progressive indigenous social transformation but rather that of foreign practices imposed on African societies. This paper, therefore, examines the contribution of western pedagogy and …	I wish to acknowledge the British Academy and GCRF (Global Challenges Research Fund) that funded the African Social Work Writing Workshops. The workshops brought together 20 Early Career Academics from five sub-Saharan African countries: Botswana, Ethiopia, Malawi, Nigeria and South Africa to work with five experienced British and Nigerian academics. My unalloyed appreciation goes to my mentors; …		Social Work Education				2022-03-15	2022	2022-03-15	2023-01-02	42	1	112-126	All OA; Green	Article	Onalu, Chinyere; Ingram, Richard	Onalu, Chinyere (Department of Social Work, University of Nigeria, Nsukka, Nigeria); Ingram, Richard (School of Education and Social Work, University of Dundee, Dundee, UK)	Onalu, Chinyere (University of Nigeria)	Onalu, Chinyere (University of Nigeria); Ingram, Richard (University of Dundee)	8	5		9.02	https://discovery.dundee.ac.uk/files/72959492/Manuscript_1.pdf	https://app.dimensions.ai/details/publication/pub.1146289308	44 Human Society; 4409 Social Work	4 Quality Education
51	2003	pub.1105388937	10.31265/jcsw.v7i1.80			Exploring the Unique Features of a First Nations Graduate-Level Social Work Program	Recently, a one-time cohort of graduate-level social work students completed a unique MSW program. The program was delivered in partnership between the Faculty of Social Work, University of Calgary and Blue Quills First Nations College and, of the twenty four graduates; twenty-one were of First Nations or Me´tis ancestry. The program honored traditional knowledge and ways of learning combined wit…			Journal of Comparative Social Work				2012-04-02	2012	2012-04-02		7	1	51-70	All OA; Gold	Article	Bodor, Ralph C.; Melnyk-Poliakiwski, Carol	Bodor, Ralph C. (); Melnyk-Poliakiwski, Carol ()		Bodor, Ralph C. (); Melnyk-Poliakiwski, Carol ()	0	0		0	https://journals.uis.no/index.php/JCSW/article/download/80/63	https://app.dimensions.ai/details/publication/pub.1105388937	44 Human Society; 4409 Social Work
52	1998	pub.1157874503	10.3390/socsci12050288			Learning Green Social Work in Global Disaster Contexts: A Case Study Approach	Green social work (GSW) is a nascent framework within the social work field that provides insights regarding social workers’ engagement in disaster settings. Although this framework has recently garnered more attention, it remains under-researched and underdeveloped within the context of social work research, education, and practice in Canada and internationally. To further develop GSW in social …		This research was funded by the Vice-President Research and Innovation International Seed Fund (Award# 2021).	Social Sciences				2023-05-06	2023	2023-05-06		12	5	288	All OA; Gold	Article	Breen, Kyle; Greig, Meredith; Wu, Haorui	Breen, Kyle (School of Social Work, Dalhousie University, Halifax, NS B3H 4R2, Canada, haorui.wu@dal.ca, (H.W.)); Greig, Meredith (School of Social Work, Dalhousie University, Halifax, NS B3H 4R2, Canada, haorui.wu@dal.ca, (H.W.); The Family Centre of Northern Alberta, Edmonton, AB T5K 1C5, Canada); Wu, Haorui (School of Social Work, Dalhousie University, Halifax, NS B3H 4R2, Canada, haorui.wu@da…	Breen, Kyle (Dalhousie University)	Breen, Kyle (Dalhousie University); Greig, Meredith (Dalhousie University; The Family Centre of Northern Alberta, Edmonton, AB T5K 1C5, Canada); Wu, Haorui (Dalhousie University)	16	12		27.94	https://www.mdpi.com/2076-0760/12/5/288/pdf?version=1683597894	https://app.dimensions.ai/details/publication/pub.1157874503	44 Human Society; 4409 Social Work
53	1993	pub.1184571708	10.3126/mef.v15i01.74006			Biophilia and Social Work: Advancing Nature-based Health and Healing Perspectives in Social Work Practice and Education	The human connection with Nature is rooted in a symbiotic relationship that fosters harmony and balance. Humans have an innate need to be in contact with Nature, relying on it for essential resources such as food, shelter, medicines, and overall well-being. In return, it is the responsibility of humans to become stewards and caretakers of Nature. This reciprocal relationship between living beings…			Molung Educational Frontier				2025-01-17	2025	2025-01-17		15		158-185	All OA; Gold	Article	Karki, Karun Kishor; Siwakoti, Hemantaraj; Wood, Jeff	Karki, Karun Kishor (School of Social Work at the University of British Columbia); Siwakoti, Hemantaraj (Alberta Health Services, Alberta); Wood, Jeff (Human Services at the University of the Fraser Valley, BC)		Karki, Karun Kishor (School of Social Work at the University of British Columbia); Siwakoti, Hemantaraj (Alberta Health Services); Wood, Jeff (University of the Fraser Valley)	1	1			https://doi.org/10.3126/mef.v15i01.74006	https://app.dimensions.ai/details/publication/pub.1184571708	42 Health Sciences; 44 Human Society; 4409 Social Work	3 Good Health and Well Being
54	1983	pub.1168279827	10.4314/ajsw.v13i4.1			Ubuntu as an emancipatory framework for teaching and learning in Social Work: A narrative literature review	Due to the fact that it focuses on collectiveness, togetherness, and justice for all, Ubuntu, embodies a transformed and Afro-sensed approach to the processes of teaching and learning. This is particularly vital for social work education because it locates the academic journey of a student within a critical, interactive, and socially engaged paradigm, which is aligned with the values of the wider…			African Journal of Social Work				2023-08-30	2023	2023-08-30		13	4	179-187	All OA; Gold	Article	Thembelihle, B Makhanya; Bongane, M Mzinyane	Thembelihle, B Makhanya (); Bongane, M Mzinyane ()		Thembelihle, B Makhanya (); Bongane, M Mzinyane ()	3	3		5.24	https://www.ajol.info/index.php/ajsw/article/download/262897/248177	https://app.dimensions.ai/details/publication/pub.1168279827	44 Human Society; 4409 Social Work	4 Quality Education
55	1979	pub.1149730435	10.1080/02615479.2022.2104243			Religion and spirituality in social work in Uganda: Lessons for social work education	There is a conspicuous silence about the role of religion and spirituality in social work in Uganda, yet they are critical components in the lives of social workers and their clients. The authors’ collective experience of social work education in Uganda, South Africa, Sweden, the UK, and Australia affirmed to an absence of content on religion and spirituality in social work education. Most univer…	The authors wish to acknowledge the research funding from their universities: Western Sydney University, La Trobe University and University of Newcastle. The authors also acknowledge Prof. Mel Gray for her in put in structuring and thorough editing of the article.		Social Work Education				2022-07-24	2022	2022-07-24	2023-02-17	42	2	202-219	All OA; Green	Article	Tusasiirwe, Sharlotte; Nabbumba, Diana; Kansiime, Peninah	Tusasiirwe, Sharlotte (School of Social Sciences, Western Sydney University - Liverpool City Campus, Liverpool, New South Wales, Australia); Nabbumba, Diana (John Richards Centre, La Trobe University - Bendigo Campus, Bendigo, Victoria, Australia); Kansiime, Peninah (School of Social Work, Excelsia College, Sydney, New South Wales, Australia)	Tusasiirwe, Sharlotte (Western Sydney University)	Tusasiirwe, Sharlotte (Western Sydney University); Nabbumba, Diana (La Trobe University); Kansiime, Peninah (Excelsia College)	13	8		14.65	https://figshare.com/articles/journal_contribution/Religion_and_spirituality_in_social_work_in_Uganda_Lessons_for_social_work_education/25449121	https://app.dimensions.ai/details/publication/pub.1149730435	44 Human Society; 4409 Social Work	4 Quality Education
56	1977	pub.1186726664	10.15270/38-4-1432			Cross-cultural practice and the indigenisation of African social work	This paper examines the issues involved in developing indigenous social work practice . Several African writers are making an interesting contribution to the important debate on indigenisation in the social work literature in Africa (Bar-On, 1998, 1999; Mupediswa, 1992, 1997; Osei-Hwedie,1995). However, their work is at an exploratory stage in that they have introduced and probed questions relati…			Social Work/Maatskaplike Werk				2002	2002	2002	2002	38	4	324-324	All OA; Green	Article	Gray, M; Allegritti, I	Gray, M (University of Newcastle); Allegritti, I (University of Newcastle)		Gray, M (University of Newcastle Australia); Allegritti, I (University of Newcastle Australia)	1	0		0.26	http://hdl.handle.net/1959.13/30833	https://app.dimensions.ai/details/publication/pub.1186726664	44 Human Society; 4409 Social Work
57	1962	pub.1141335823	10.18060/24145			“Theory’s Cool, But Theory With No Practice Ain’t Shit…”: Critical Theories and Frameworks to Dismantle Racism in Social Work Education and Practice	As it stands today, social work education falls short in providing critical theories and frameworks that reflect the experiences of Black, Indigenous, and People of Color (BIPOC). Such insufficiencies maintain racism and other forms of oppression that plague both social work pedagogy and praxis. To challenge and dismantle hegemonic curricula, social work education needs to do more to provide the …			Advances in Social Work				2021-09-23	2021	2021-09-23		21	2/3	672-689	All OA; Gold	Article	Maglalang, Dale Dagar; Rao, Smitha	Maglalang, Dale Dagar (Boston College); Rao, Smitha (Boston College)		Maglalang, Dale Dagar (Boston College); Rao, Smitha (Boston College)	14	5		8.6	https://journals.iupui.edu/index.php/advancesinsocialwork/article/download/24145/23867	https://app.dimensions.ai/details/publication/pub.1141335823	44 Human Society; 4409 Social Work	4 Quality Education
58	1961	pub.1140833299	10.47264/idea.jhsms/2.1.10			Professionals unprepared: A critical appraisal of social work practice at the Drugs Abuse Rehabilitation Centres in Khyber Pakhtunkhwa, Pakistan	Social work is a practice-based profession that facilitates, enables, and rehabilitates the neglected segments of society facing various issues, including substance abuse. However, social workers' efficiency in substance use rehabilitation is constrained by several factors. Pakistan follows the imported theoretical models of social work, which face enormous challenges during implementation for la…			Journal of Humanities Social and Management Sciences (JHSMS)				2021-08-29	2021	2021-08-29		2	1	108-120	All OA; Hybrid	Article	Ahmad, Shakeel; Bano, Abida	Ahmad, Shakeel (Department of Social Work, University of Peshawar, Peshawar, Pakistan); Bano, Abida (Institute of Peace and Conflict Studies, University of Peshawar, Peshawar, Pakistan)		Ahmad, Shakeel (University of Peshawar); Bano, Abida (University of Peshawar)	1	1		0.61	https://ideapublishers.org/index.php/jhsms/article/download/453/202	https://app.dimensions.ai/details/publication/pub.1140833299	44 Human Society; 4409 Social Work	3 Good Health and Well Being
59	1951	pub.1107899903	10.1080/02615479.2018.1539068			Teaching ethnicity in social work education: teachers’ experiences in Sweden	The shifting demographics that come with migration and globalization have changed the settings for social work education in Sweden. To promote sustainability in a diverse society, strategies for inclusion and equality are essential in the development of core competencies in social work. One essential question is how social work education has responded to the demographic changes. The study aims to…		This work was supported by The Swedish Research Council [D0238801].	Social Work Education				2018-10-29	2018	2018-10-29	2019-01-02	38	1	34-46	All OA; Hybrid	Article	Lill, Linda; Pettersson, Helene Jacobson	Lill, Linda (Institutionen för socialt arbete | Department of Social Work, Malmö Universitet | Malmö University, Malmö, Sweden); Pettersson, Helene Jacobson (Institutionen för Socialt arbete | Department of Social Work, Linnéuniversitetet | Linneaus University, Kalmar, Sweden)	Pettersson, Helene Jacobson (Linnaeus University)	Lill, Linda (Malmö University); Pettersson, Helene Jacobson (Linnaeus University)	4	0		1.51	https://www.tandfonline.com/doi/pdf/10.1080/02615479.2018.1539068?needAccess=true	https://app.dimensions.ai/details/publication/pub.1107899903	44 Human Society; 4409 Social Work	10 Reduced Inequalities; 4 Quality Education
60	1889	pub.1120595072	10.15270/55-3-744			PROMOTING SOCIAL WORK GRADUATES’ EMPLOYMENT THROUGH THE SOCIAL WORK CURRICULUM: EMPLOYERS’ PERSPECTIVES ON THE EMPLOYABILITY OF UNISA’S NEWLY QUALIFIED SOCIAL WORKERS	The silence about employers’ perspectives on the employability of newly qualified Social Work graduates from the largest open distance-learning university in South Africa was highlighted as the problem for this study. Underpinned by the theory of collaborative advantage as the theoretical framework adopted for this study, and following a qualitative research approach, the researcher entered into …			Social Work/Maatskaplike Werk				2019-08	2019	2019-08		55	3	341	All OA; Gold	Article	Alpaslan, Assim	Alpaslan, Assim (UNISA)		Alpaslan, Assim (UNISA)	3	2		1.32	https://socialwork.journals.ac.za/pub/article/download/744/677	https://app.dimensions.ai/details/publication/pub.1120595072	44 Human Society; 4409 Social Work
61	1844	pub.1184086917	10.1177/00208728241305451			Identifying Nigerian literature to inform culturally relevant social work education: A scoping review	This study is the first to provide evidence of an extensive Nigerian social work literature. It is significant as it unsettles and refutes the prevailing narrative of an absence of African, specifically Nigerian, social work literature to inform the development of a culturally relevant curriculum. A scoping review was conducted to identify Nigerian social work literature that yielded 308 papers. …		Funding The author(s) disclosed receipt of the following financial support for the research, authorship and/or publication of this article: The authors thank the International Association of Schools of Social Work (IASSW) for funding this research through their International Projects funding, Reference: Education IP22-09.	International Social Work				2025-01-02	2025	2025-01-02	2025-03	68	2	238-254	All OA; Hybrid	Article	Levy, Susan; Gray, Mel; Okoye, Uzoma; Amadasun, Solomon	Levy, Susan (University of Dundee, UK); Gray, Mel (University of Newcastle, Australia); Okoye, Uzoma (University of Nigeria, Nigeria); Amadasun, Solomon (Deakin University, Australia)	Levy, Susan (University of Dundee)	Levy, Susan (University of Dundee); Gray, Mel (University of Newcastle Australia); Okoye, Uzoma (University of Nigeria); Amadasun, Solomon (Deakin University)	0	0			https://journals.sagepub.com/doi/pdf/10.1177/00208728241305451	https://app.dimensions.ai/details/publication/pub.1184086917	44 Human Society; 4409 Social Work	4 Quality Education
62	1838	pub.1181909169	10.3390/socsci13110589			The Responsibilities of Social Work for Ecosocial Justice	The crisis of civilization we are experiencing unbalances the inter-relational, interdependency and intergenerational relationships of the planetary ecosystem, putting all species at risk. The current relationship between the unlimited economic development model and its social impacts in all regions, territories and communities is analyzed. These are more severe in the global South and the most i…		This research received no external funding.	Social Sciences				2024-10-30	2024	2024-10-30		13	11	589	All OA; Gold	Article	Parra Ramajo, Belén; Prat Bau, Núria	Parra Ramajo, Belén (Campus Mundet, Universitat de Barcelona, 08007 Barcelona, Spain); Prat Bau, Núria (Campus Mundet, Universitat de Barcelona, 08007 Barcelona, Spain)	Parra Ramajo, Belén (University of Barcelona); Prat Bau, Núria (University of Barcelona)	Parra Ramajo, Belén (University of Barcelona); Prat Bau, Núria (University of Barcelona)	2	2			https://doi.org/10.3390/socsci13110589	https://app.dimensions.ai/details/publication/pub.1181909169	44 Human Society; 4409 Social Work	10 Reduced Inequalities; 16 Peace, Justice and Strong Institutions
63	1827	pub.1164093314	10.1007/s44282-023-00006-8			An exploration of contextually relevant curricula in international social work education: learning from the experiences of selected Asian countries	Current global uncertainties such as increasing socio-economic and political difficulties have amplified the significance of researching the nature of international social work education. This pilot study collaboratively investigated the educational characteristics of international social work curricula in Asia to identify the prevailing conditions related to this discipline. Data were collected …	We are extremely grateful for the support received during the presurvey from the Asian and Pacific Association for Social Work Education (APASWE). We also sincerely appreciate the support and experience sharing provided by all forum members, especially Ven Dr Masatoshi Hasegawa, Dr Tatsuru Akimoto, Prof Noriko Totsuka, Prof Yusuke Fujimori and Dr Josef Gohori from the Asian Research Institute for…	This work was supported by JSPS KAKENHI Grant Number JP23H00900.	Discover Global Society				2023-09-14	2023	2023-09-14		1	1	6	All OA; Gold	Article	Higashida, Masateru; Poonpoksin, Wanwadee; Paul, Krittebas; Das, Tulshi Kumar; Vasudevan, Varathagowry; Ali, Isahaque; Jafar, Muhammad; Shoukat, Aisha; Matsuo, Kana	Higashida, Masateru (Asian Research Institute for International Social Work, Shukutoku University, Chiba, Japan); Poonpoksin, Wanwadee (Department of Social Work, Faculty of Social Administration, Thammasat University, Bangkok, Thailand); Paul, Krittebas (Department of Social Work, Shahjalal University of Science and Technology (SUST), Sylhet, Bangladesh); Das, Tulshi Kumar (Department of Social …	Higashida, Masateru (Shukutoku University)	Higashida, Masateru (Shukutoku University); Poonpoksin, Wanwadee (Thammasat University); Paul, Krittebas (Shahjalal University of Science and Technology); Das, Tulshi Kumar (Shahjalal University of Science and Technology); Vasudevan, Varathagowry (Training Division, National Institute of Social Development, Seeduwa, Sri Lanka); Ali, Isahaque (Universiti Sains Malaysia); Jafar, Muhammad (Islamia U…	1	1		1.75	https://link.springer.com/content/pdf/10.1007/s44282-023-00006-8.pdf	https://app.dimensions.ai/details/publication/pub.1164093314	44 Human Society; 4409 Social Work	4 Quality Education
64	1802	pub.1168710914	10.4314/ajsw.v13i6.1			Findings from a national evaluation of social work field education programs in Liberia, West Africa	Program evaluation is an integral component of social work field education and continuous social work programmatic improvement. To conduct an inaugural national survey of social work field education programs in Liberia, West Africa, Made in Africa Evaluation (MAE) was used to design and implement a national evaluation of social work field education programs. The evaluation was led by and implemen…			African Journal of Social Work				2023-12-30	2023	2023-12-30		13	6	273-284	All OA; Gold	Article	Tuggle, Felicia; Banks, Sevaughn; Gbessage, Sylvestine	Tuggle, Felicia (); Banks, Sevaughn (); Gbessage, Sylvestine ()		Tuggle, Felicia (); Banks, Sevaughn (); Gbessage, Sylvestine ()	3	3		5.24	https://www.ajol.info/index.php/ajsw/article/download/263757/248978	https://app.dimensions.ai/details/publication/pub.1168710914	44 Human Society; 4409 Social Work	4 Quality Education
65	1751	pub.1037115106	10.4236/jss.2013.16012			The Philosophical Exposition of the Mind of the Social Worker: Issues and Questions on the African Environment	The philosophical penetration of the social work practice in Africa comes full cycle when a critical exposition of the contending issues and questions is carried out. Social challenges and problems in Africa make human suffering in the continent to be one of the highest in the world. An attempt to know the mind of the social worker in Africa reflects the issues of social work that dominate the Af…			Open Journal of Social Sciences				2013	2013		2013	01	06	73-80	All OA; Gold	Article	Casimir, Ani; Samuel, Ejiofor	Casimir, Ani (); Samuel, Ejiofor ()		Casimir, Ani (); Samuel, Ejiofor ()	3	0		0.79	http://www.scirp.org/journal/PaperDownload.aspx?paperID=40347	https://app.dimensions.ai/details/publication/pub.1037115106	44 Human Society; 4409 Social Work	16 Peace, Justice and Strong Institutions
66	1747	pub.1129802152	10.18060/22933			Race Still Matters: The Relationship Between Racial and Poverty Attitudes Among Social Work Students	The attitudes that social work students hold about race and poverty impact the effectiveness of their practice in the field. This study assessed color-blind racial attitudes and attitudes towards poverty of graduating BSW students (n=41) and MSW students (n=128) from three accredited social work programs. Results indicate a correlation between color-blind racial attitudes and attitudes toward pov…			Advances in Social Work				2020-07-30	2020	2020-07-30		20	1	132-151	All OA; Gold	Article	Constance-Huggins, Monique; Davis, Ashley; Yang, Jessica	Constance-Huggins, Monique (Winthrop University); Davis, Ashley (); Yang, Jessica ()		Constance-Huggins, Monique (Winthrop University); Davis, Ashley (); Yang, Jessica ()	5	1		2.23	http://journals.iupui.edu/index.php/advancesinsocialwork/article/download/22933/23134	https://app.dimensions.ai/details/publication/pub.1129802152	44 Human Society; 4409 Social Work	10 Reduced Inequalities
67	1738	pub.1140974512	10.1080/0312407x.2021.1945731			Claiming and Expanding Social Work Knowledge in the International Space				Australian Social Work				2021-09-08	2021	2021-09-08	2021-10-02	74	4	391-393	All OA; Bronze	Article	McAuliffe, Donna	McAuliffe, Donna (Health Group, Griffith University, Australia)	McAuliffe, Donna (Griffith University)	McAuliffe, Donna (Griffith University)	0	0		0	https://www.tandfonline.com/doi/pdf/10.1080/0312407X.2021.1945731?needAccess=true	https://app.dimensions.ai/details/publication/pub.1140974512	44 Human Society; 4407 Policy and Administration; 4409 Social Work
68	1730	pub.1139519786	10.1177/14680173211009177			Native American social work – Including family and community	Summary This study investigates family involvement and culturally informed social work in Native American communities. The study was conducted in Native American communities in Montana, USA. Twenty-three Native American social work professionals participated in qualitative interviews. Analyses draw on theory of historical trauma and family involvement in indigenous social. Throughout the study, i…	We would like to extend our gratitude to Sheldon Spotted Elk, friend, and ICWA specialist for his time in reading and offering feedback. Many thanks to The Salish Kootenai College and Ft. Peck’s Institutional Review Boards who approved our research. Finally, and most importantly, thanks to the participants who shared with us their heartfelt stories and thoughts. Without each of you, this would no…	FundingThe authors disclosed receipt of the following financial support for the research, authorship and/or publication of this article: This research project was funded by the Sámi Parliament of Norway and Regional Centre for Child and Youth Mental Health and Child Welfare North, UiT The Arctic University of Norway and Department of Education, UiT The Arctic University of Norway.	Journal of Social Work				2021-07-05	2021	2021-07-05	2022-05	22	3	615-636	All OA; Hybrid	Article	Swanson, Shanley; Nygård, Reidunn H; Saus, Merete	Swanson, Shanley (Regional Centre for Child and Youth Mental Health and Child Welfare – North UiT – The Arctic University of Norway, Tromsø, Norway); Nygård, Reidunn H (Regional Centre for Child and Youth Mental Health and Child Welfare – North UiT – The Arctic University of Norway, Tromsø, Norway); Saus, Merete (Regional Centre for Child and Youth Mental Health and Child Welfare – North UiT – Th…	Nygård, Reidunn H (UiT The Arctic University of Norway)	Swanson, Shanley (UiT The Arctic University of Norway); Nygård, Reidunn H (UiT The Arctic University of Norway); Saus, Merete (UiT The Arctic University of Norway)	7	4		4.3	https://journals.sagepub.com/doi/pdf/10.1177/14680173211009177	https://app.dimensions.ai/details/publication/pub.1139519786	44 Human Society; 4409 Social Work
69	1722	pub.1184426487	10.1093/bjsw/bcae204			Self-care in social work: An imperative or beyond reach?	Abstract In recent years, the self-care of social workers has become a focus for research and practice in recognition of the demands of the social work role. As part of a research project to explore ways to embed self-care into a social work degree programme at a Scottish university, a narrative literature review was undertaken to examine existing research on self-care for social work students an…		The Self-Care in the Social Work Curriculum project, for which this review was produced, was supported by a Principal’s Teaching Award Scheme grant from the University of Edinburgh.	The British Journal of Social Work				2025-01-15	2025	2025-01-15	2025-04-01	55	3	1455-1473	All OA; Hybrid	Article	Rose, Sarah; McCusker, Pearse; Mitchell, Mary; Roesch-Marsh, Autumn; Jian, Miao; Petrova, Lora	Rose, Sarah (School of Health and Social Care, Edinburgh Napier University, 9 Sighthill Court, Edinburgh, EH11 4BN, Scotland); McCusker, Pearse (School of Social and Political Science, University of Edinburgh, Chrystal Macmillan Building, 15a George Square, Edinburgh, EH8 9LD, Scotland); Mitchell, Mary (School of Social and Political Science, University of Edinburgh, Chrystal Macmillan Building, …	Rose, Sarah (Edinburgh Napier University)	Rose, Sarah (Edinburgh Napier University); McCusker, Pearse (University of Edinburgh); Mitchell, Mary (University of Edinburgh); Roesch-Marsh, Autumn (University of Edinburgh); Jian, Miao (University of Edinburgh; Nankai University); Petrova, Lora (University of Edinburgh)	1	1			https://doi.org/10.1093/bjsw/bcae204	https://app.dimensions.ai/details/publication/pub.1184426487	44 Human Society; 4409 Social Work
70	1708	pub.1084741410	10.1080/02615479.2017.1310833			The role of social work field education programmes in the transmission of developmental social work knowledge in Southern and East Africa	This paper reports on the findings of a study on the role of social work field education programmes in the transmission of developmental social work knowledge in Southern and East Africa. It highlights the challenges in locating developmental social work placements and the creativity shown by social work educators in addressing these challenges and improving learning opportunities for social work…	The authors would like to recognise the participants who persevered with an interview process that was often challenged by poor internet and phone connections. This speaks to their commitment to the advancement of social work education in general and the fieldwork component in particular in Southern and East Africa.	This work was jointly supported by International Association of School of Social Work (IASSW) and University of Newcastle, Australia.	Social Work Education				2017-04-10	2017	2017-04-10	2017-08-18	36	6	623-635	All OA; Green	Article	Gray, Mel; Agllias, Kylie; Mupedziswa, Rodreck; Mugumbate, Jacob	Gray, Mel (School of Humanities and Social Sciences, The University of Newcastle, Newcastle, Australia); Agllias, Kylie (School of Humanities and Social Sciences, The University of Newcastle, Newcastle, Australia); Mupedziswa, Rodreck (Faculty of Social Sciences, Department of Social Work, School of Social Work, University of Botswana, Gaborone, Botswana); Mugumbate, Jacob (School of Humanities a…	Agllias, Kylie (University of Newcastle Australia)	Gray, Mel (University of Newcastle Australia); Agllias, Kylie (University of Newcastle Australia); Mupedziswa, Rodreck (University of Botswana); Mugumbate, Jacob (University of Newcastle Australia)	24	7		8.58	http://hdl.handle.net/1959.13/1353693	https://app.dimensions.ai/details/publication/pub.1084741410	39 Education; 3901 Curriculum and Pedagogy; 44 Human Society; 4409 Social Work	4 Quality Education
71	1678	pub.1124383456	10.21608/ejsw.2020.68765			Social work education in the Middle East and North Africa: Students’ perspectives at 13 universities in 10 countries	Efforts for improving social work education (SWE) in the Middle East and North Africa aim to address complex development issues. Using quantitative and qualitative approaches, this paper examines students’ perceptions of SWE, surveying 810 students in 13 universities in 10 countries: Egypt, Iraq, Jordan, Kuwait, Libya, Morocco, Oman, Palestine, Saudi Arabia, and Yemen. Results indicate that prima…			Egyptian Journal of Social Work				2020-01-20	2020	2020-01-20	2020-01-20	9	1	189-204	All OA; Bronze	Article	Ibrahim, Qusai A; Hreish, Khalid M; Hantoosh, Khalid S; Benson, Odessa Gonzalez; Galalh, Ayman A; AL-Halalat, Khalil I; Aladayleh, Lubna Aladayleh M; Shalaby, Emadeldeen A; Matter, Hazem M; Al-Kandari, Yagoub Y.; Hashim, Sokina A.; Eltaef, Mansour A; Sofy, Samar S; Meguid, Mona B Abdel; Daqaq, Nabila N; Elardi, Mohammed B; Sharaia, Ramadan K; Al Madhani, Hassan A; Braz, Talaat H; Sorur, Magda F	Ibrahim, Qusai A (); Hreish, Khalid M (); Hantoosh, Khalid S (); Benson, Odessa Gonzalez (); Galalh, Ayman A (); AL-Halalat, Khalil I (); Aladayleh, Lubna Aladayleh M (); Shalaby, Emadeldeen A (); Matter, Hazem M (); Al-Kandari, Yagoub Y. (); Hashim, Sokina A. (); Eltaef, Mansour A (); Sofy, Samar S (); Meguid, Mona B Abdel (); Daqaq, Nabila N (); Elardi, Mohammed B (); Sharaia, Ramadan K (); Al …		Ibrahim, Qusai A (); Hreish, Khalid M (); Hantoosh, Khalid S (); Benson, Odessa Gonzalez (); Galalh, Ayman A (); AL-Halalat, Khalil I (); Aladayleh, Lubna Aladayleh M (); Shalaby, Emadeldeen A (); Matter, Hazem M (); Al-Kandari, Yagoub Y. (); Hashim, Sokina A. (); Eltaef, Mansour A (); Sofy, Samar S (); Meguid, Mona B Abdel (); Daqaq, Nabila N (); Elardi, Mohammed B (); Sharaia, Ramadan K (); Al …	5	2		2.23	https://ejsw.journals.ekb.eg/article_68765_4c57da96239d8eef090b9a88293cd280.pdf	https://app.dimensions.ai/details/publication/pub.1124383456	44 Human Society; 4409 Social Work
72	1665	pub.1059436883	10.1093/bjsw/bcw136			Reflective Learning and Teaching in Social Work Field Education in International Contexts	Unlike many other reported international social work (ISW) experiences, this article aims to analyse strengths and weaknesses in overseas placements and to present strategies to improve the quality of field education in international contexts. Drawing on primary data, field education documents and critical field experiences, it demonstrates how two students from an Australian social work programm…	Unfunded research. I would like to thank all those who have contributed to making this article. This article is published to mark the occasion of twenty-five years of successful social work program at Charles Sturt University, Australia.		The British Journal of Social Work				2016-10-15	2016	2016-10-15	2017-01-01	47	1	198-218	All OA; Bronze	Article	Pawar, Manohar	Pawar, Manohar ()	Pawar, Manohar ()	Pawar, Manohar ()	21	6		5.92	https://academic.oup.com/bjsw/article-pdf/47/1/198/10762526/bcw136.pdf	https://app.dimensions.ai/details/publication/pub.1059436883	44 Human Society; 4409 Social Work	4 Quality Education
73	1661	pub.1105730121	10.5296/ijsw.v5i2.13401			Where Is Developmental Social Work as Social Work Practice Method in Tanzania? The Case of Dar es Salaam Region	There is a consensus that developmental social work method is increasingly gaining support as a panacea for social and economic problems facing the African continent. The main emphasis of the method is centered on pulling together community resources in addressing social and economic problems. The literature shows that the method is currently underutilized in Tanzania and the reasons propelling s…			International Journal of Social Work				2018-07-19	2018	2018-07-19		5	2	43	All OA; Bronze	Article	Manyama, William	Manyama, William ()		Manyama, William ()	12	5		4.6	https://www.macrothink.org/journal/index.php/ijsw/article/download/13401/10642	https://app.dimensions.ai/details/publication/pub.1105730121	44 Human Society; 4407 Policy and Administration; 4409 Social Work
74	1644	pub.1101228672	10.1177/0020872818757590			Sustaining quality learning abroad opportunities in Australian schools of social work	Student learning abroad experiences are encouraged to develop students’ intercultural understanding and global citizenship. This article reports internationally collaborative research exploring social work student short-term mobility programmes and international field education placements. Findings from interviews with staff from Australian schools of social work are presented. Themes developed f…			International Social Work				2018-02-26	2018	2018-02-26	2019-03	62	2	980-993	All OA; Green	Article	Zuchowski, Ines; Miles, Debra; Howard, Elise; Harris, Nonie; Francis, Abraham	Zuchowski, Ines (James Cook University, Australia); Miles, Debra (James Cook University, Australia); Howard, Elise (James Cook University, Australia); Harris, Nonie (James Cook University, Australia); Francis, Abraham (James Cook University, Australia)	Zuchowski, Ines (James Cook University)	Zuchowski, Ines (James Cook University); Miles, Debra (James Cook University); Howard, Elise (James Cook University); Harris, Nonie (James Cook University); Francis, Abraham (James Cook University)	3	1		1.13	https://researchonline.jcu.edu.au/52008/17/JCU_52008_zuchowski_et_al_2018_accepted%20author%20version.pdf	https://app.dimensions.ai/details/publication/pub.1101228672	44 Human Society; 4409 Social Work	4 Quality Education
75	1635	pub.1023086134	10.1080/08841233.2011.597678			A Constructionist Approach to the Use of Arts-Based Materials in Social Work Education: Making Connections Between Art and Life	Providing engaging, relevant, and motivating courses to teach students about interpersonal social work theories is an ongoing challenge. The educator's problem is to provide an environment in which students engage with theory in a way that enables them to apply it in practice situations and reflect critically on the ways theories are produced and interact with their own values and beliefs. This a…			Journal of Teaching in Social Work				2011-09	2011		2011-09	31	4	400-414	All OA; Green	Article	Keddell, Emily	Keddell, Emily (Department of Sociology, Gender and Social Work, University of Otago, Dunedin, New Zealand)	Keddell, Emily (University of Otago)	Keddell, Emily (University of Otago)	21	3		5.05	http://hdl.handle.net/10523/6609	https://app.dimensions.ai/details/publication/pub.1023086134	44 Human Society; 4409 Social Work
76	1593	pub.1125714798	10.1177/1476750320902902			The predicament of social work development and the emergence of social work action/practice research in China				Action Research				2020-03-16	2020	2020-03-16	2020-03	18	1	7-18	All OA; Bronze	Article	Ku, Hok Bun; Ho, Denny KL	Ku, Hok Bun (China Research and Development Network, Peking U-Hong Kong PolyU China Social Work Research Center, Department of Applied Social Sciences, The Hong Kong Polytechnic University, Kowloon, Hong Kong); Ho, Denny KL (The Hong Kong Polytechnic University, Kowloon, Hong Kong)		Ku, Hok Bun (Hong Kong Polytechnic University); Ho, Denny KL (Hong Kong Polytechnic University)	14	8		6.24	https://journals.sagepub.com/doi/pdf/10.1177/1476750320902902	https://app.dimensions.ai/details/publication/pub.1125714798	44 Human Society; 4409 Social Work
77	1570	pub.1111190275	10.5296/ijsw.v6i1.14175			Social Work Education in Ethiopia: Past, Present and Future	The study presents the history and current status of social work education in Ethiopia. Five heads of social work schools, eight social work educators and 35 social work professionals participated in the study. Data from participants were gathered through online survey. Qualitative tools were designed for each group and distributed by email. In addition, review of literature was made to generate …			International Journal of Social Work				2019-01-05	2019	2019-01-05		6	1	1	All OA; Bronze	Article	Kebede, Wassie	Kebede, Wassie ()		Kebede, Wassie ()	15	4		6.58	http://www.macrothink.org/journal/index.php/ijsw/article/download/14175/11224	https://app.dimensions.ai/details/publication/pub.1111190275	44 Human Society; 4409 Social Work	4 Quality Education
78	1568	pub.1190941425	10.1007/s44322-025-00036-x			Individualized anti-oppressive practice coaching (I-AOPC): a pilot study on anti-oppressive practice in social work education	BackgroundDespite social work educational standards on cultural competence that address racial inequality there are challenges in identifying effective pedagogical practices that measure course design for individual professional growth. The purpose of this pilot study is to investigate the use of the Integrated Systems Anti-oppressive Practice (ISAOP) Model and Individualized Anti-oppressive Prac…	Not applicable.	Not applicable.	Journal of New Approaches in Educational Research				2025-07-18	2025	2025-07-18		14	1	17	All OA; Gold	Article	Osborn, Preston R.; Hughley, Ashura; Stepney, Lois; Lee, Mo Yee	Osborn, Preston R. (College of Education and Human Service Professions, University of Minnesota, Duluth, MN, USA); Hughley, Ashura (College of Social Work, The Ohio State University, Columbus, OH, USA); Stepney, Lois (College of Social Work, The Ohio State University, Columbus, OH, USA); Lee, Mo Yee (College of Social Work, The Ohio State University, Columbus, OH, USA)	Osborn, Preston R. (University of Minnesota Twin Cities)	Osborn, Preston R. (University of Minnesota Twin Cities); Hughley, Ashura (The Ohio State University); Stepney, Lois (The Ohio State University); Lee, Mo Yee (The Ohio State University)	0	0			https://link.springer.com/content/pdf/10.1007/s44322-025-00036-x.pdf	https://app.dimensions.ai/details/publication/pub.1190941425	44 Human Society; 4409 Social Work	4 Quality Education
79	1564	pub.1141335833	10.18060/24184			An Experiential Model for Cultivating Cultural Humility and Embodying Antiracist Action in and Outside the Social Work Classroom	Social Workers in academia may enjoy seemingly endless discussions and debates on ever-evolving “diversity concepts” including privilege, oppression, microaggressions, and white supremacy culture, but students and would-be allies are often stymied, if not altogether lost by the enormity of overcoming injustice. The 7E model for Cultural Humility and Antioppressive Practice provides specific and c…			Advances in Social Work				2021-09-23	2021	2021-09-23		21	2/3	690-707	All OA; Gold	Article	Fisher, Kerri	Fisher, Kerri (Baylor University)		Fisher, Kerri (Baylor University)	10	4		6.15	https://journals.iupui.edu/index.php/advancesinsocialwork/article/download/24184/23868	https://app.dimensions.ai/details/publication/pub.1141335833	44 Human Society; 4409 Social Work
80	1564	pub.1160038607	10.1080/09503153.2023.2223362			Learning from Ikibiri and Ubuntu to Decolonise Social Work Research in Higher Education	This article explores the foundation of a joint research project between social work (SW) colleagues at Hope Africa University in Burundi, and Oxford Brookes University in the United Kingdom (UK). It considers the destructive impact of colonialism on indigenous SW practices in Burundi setting out an argument for decolonisation of the SW curriculum both in Burundi and the UK. Drawing on the work o…			Practice				2023-06-23	2023	2023-06-23	2024-03-14	36	2	159-171	All OA; Hybrid	Article	Childs, Jill; Mohamed, Omar; Pike, Nick; Muchiri, Susan; Bell, Jody; Dibo, Alayna; Ndabarushimana, Alexis	Childs, Jill (); Mohamed, Omar (); Pike, Nick (); Muchiri, Susan (); Bell, Jody (); Dibo, Alayna (); Ndabarushimana, Alexis ()		Childs, Jill (); Mohamed, Omar (); Pike, Nick (); Muchiri, Susan (); Bell, Jody (); Dibo, Alayna (); Ndabarushimana, Alexis ()	2	2		3.49	https://www.tandfonline.com/doi/pdf/10.1080/09503153.2023.2223362?needAccess=true&role=button	https://app.dimensions.ai/details/publication/pub.1160038607	44 Human Society; 4409 Social Work
81	1559	pub.1022168326	10.1080/17496535.2016.1159775			Informed outrage: tackling shame and stigma in poverty education in social work	The experience of poverty as shameful is felt by some people living in poverty due to the internalisation of stigmatising neo-liberal discourses which construe poverty as the consequence of individual failings of effort, competence or morality. A critical response requires an analysis of poverty as primarily caused by structural factors, as without this critical perspective, social workers can be…			Ethics and Social Welfare				2016-03-24	2016	2016-03-24	2016-04-02	10	2	149-162	All OA; Green	Article	Beddoe, Liz; Keddell, Emily	Beddoe, Liz (School of Counselling, Human Services and Social Work, University of Auckland, New Zealand); Keddell, Emily (School of Sociology, Gender and Social Work, University of Otago, New Zealand)	Beddoe, Liz (University of Auckland)	Beddoe, Liz (University of Auckland); Keddell, Emily (University of Otago)	34	5		9.59	https://researchspace.auckland.ac.nz/bitstream/2292/29546/5/Beddoe%26%20Keddell%202016%20Tackling%20Shame%20%20FINAL%20acceptedwithcoversheet.pdf	https://app.dimensions.ai/details/publication/pub.1022168326	44 Human Society; 4409 Social Work	1 No Poverty; 10 Reduced Inequalities
82	1537	pub.1164696795	10.1093/bjsw/bcad212			The Place of Knowledge in Constructing Social Work Identity: Validating Vagueness	Abstract Social work, globally, has struggled persistently to justify itself as an academic or professional discipline. Its terrain is not the academic high ground, where principles and concomitant courses of action seem clear, but the domain of practice, where knowledge and actions are plural, ambiguous, situated and contested. A consequence of the diffuse nature of social work knowledge and pra…	The authors would like to thank the participants who took part in the original PhD research, and the two reviewers for their careful reading and very helpful suggestions on the manuscript.	There was no funding attached to this research.	The British Journal of Social Work				2023-10-05	2023	2023-10-05	2024-05-16	54	3	958-975	All OA; Hybrid	Article	Daly, Maura; McCulloch, Trish; Smith, Mark	Daly, Maura (Department of Social Work, School of Humanities, Social Sciences and Law, Old Medical School, University of Dundee, Dundee DD1 4HN, UK); McCulloch, Trish (Department of Social Work, School of Humanities, Social Sciences and Law, Old Medical School, University of Dundee, Dundee DD1 4HN, UK); Smith, Mark (Department of Social Work, School of Humanities, Social Sciences and Law, Old Med…	Daly, Maura (University of Dundee)	Daly, Maura (University of Dundee); McCulloch, Trish (University of Dundee); Smith, Mark (University of Dundee)	9	9		15.72	https://doi.org/10.1093/bjsw/bcad212	https://app.dimensions.ai/details/publication/pub.1164696795	44 Human Society; 4409 Social Work
83	1532	pub.1152627247	10.18060/24776			Disrupting White Supremacy: Testimonios to Reveal the Experiences of Women of Color in Social Work Doctoral Education	Social workers must participate in ongoing anti-racist and culturally attuned approaches to disrupt white supremacy in our profession, institutions, and society. Our social work mission, values, and ethics demand that we engage in social work education, practice, and scholarship that seeks social justice for all people. In line with these expectations, social work doctoral education is tasked wit…			Advances in Social Work				2022-11-08	2022	2022-11-08		22	2	647-679	All OA; Gold	Article	Mackey, Cynthia; Hernandez, Nidia; Lechuga-Pena, Stephanie; Mitchell, Felicia	Mackey, Cynthia (Arizona State University); Hernandez, Nidia (); Lechuga-Pena, Stephanie (); Mitchell, Felicia ()		Mackey, Cynthia (Arizona State University); Hernandez, Nidia (); Lechuga-Pena, Stephanie (); Mitchell, Felicia ()	7	6		7.89	https://journals.iupui.edu/index.php/advancesinsocialwork/article/download/24776/24422	https://app.dimensions.ai/details/publication/pub.1152627247	44 Human Society; 4409 Social Work	4 Quality Education
84	1531	pub.1145107228	10.5296/ijsw.v9i1.19129			The Shifting Landscape of International Practicum in Social Work Education	International practicum, or international field placements, create opportunities for social work students to address global social challenges in an international setting and prepare for social work practice. The landscape of international practica in social work has evolved and shifted over the last two decades. This article reports on the findings of a literature review that was conducted to und…			International Journal of Social Work				2022-01-28	2022	2022-01-28		9	1	1-25	All OA; Hybrid	Article	Ali, Wasif; Drolet, Julie L.; Khatiwada, Kamal; Chilanga, Emmanuel; Musah, Mohammed Nurudeen	Ali, Wasif (University of Calgary); Drolet, Julie L. (University of Calgary); Khatiwada, Kamal (University of Calgary); Chilanga, Emmanuel (University of Calgary); Musah, Mohammed Nurudeen (University of Calgary)		Ali, Wasif (University of Calgary); Drolet, Julie L. (University of Calgary); Khatiwada, Kamal (University of Calgary); Chilanga, Emmanuel (University of Calgary); Musah, Mohammed Nurudeen (University of Calgary)	1	1		1.13	https://www.macrothink.org/journal/index.php/ijsw/article/download/19129/15148	https://app.dimensions.ai/details/publication/pub.1145107228	44 Human Society; 4409 Social Work
85	1524	pub.1049239056	10.1080/13691457.2016.1155542			Social work education in a time of national crisis in Greece: educating the workforce to combat inequalities	Since 2010, Greece has experienced an unprecedented economic and humanitarian crisis, which continues to have tremendous social impact. Austerity measures and policy cuts have included a dis-investment in social work and social care and more recently the abolition of one of the four national Social Work Departments providing qualifying social work education. In this context, this study addresses …	We would like to acknowledge the support of the School of Nursing, Midwifery and Social Work, University of Manchester and thank Dr Lorraine Green for her contribution during earlier stages of the research.		European Journal of Social Work				2016-03-25	2016	2016-03-25	2016-07-03	19	3-4	368-384	All OA; Green	Article	Dedotsi, Sofia; Young, Alys; Broadhurst, Karen	Dedotsi, Sofia (School of Nursing, Midwifery and Social Work, University of Manchester, University Place Oxford Road Jean McFarlane Building, Manchester, M13 9PL, UK); Young, Alys (School of Nursing, Midwifery and Social Work, University of Manchester, University Place Oxford Road Jean McFarlane Building, Manchester, M13 9PL, UK); Broadhurst, Karen (School of Nursing, Midwifery and Social Work, U…	Dedotsi, Sofia (University of Manchester)	Dedotsi, Sofia (University of Manchester); Young, Alys (University of Manchester); Broadhurst, Karen (University of Manchester)	14	2		3.95	http://nrl.northumbria.ac.uk/id/eprint/33092/1/Full%20Text%20Revised%20Paper.pdf	https://app.dimensions.ai/details/publication/pub.1049239056	44 Human Society; 4409 Social Work	4 Quality Education
86	1521	pub.1169207250	10.1093/bjsw/bcae027			A Birthmother’s Counter-Story of Racism and Oppression in Children’s Social Work: Carving an Afro-Centric Space for Sawubona in Euro-Centric Social Work Education, Practice, and the Safeguarding System	Abstract In this article, I ask ‘What are the specific challenges and controversies that birth mothers of ethnic minorities (EM) experience in the safeguarding context’? The aim is to examine safeguarding practices and ascertain how power, racism and gender oppression are understood and experienced by mothers of EMs in social work. The literature highlighted complexities and ethical concerns rega…		The author received no financial support for the research, authorship and/or publication of this article.	The British Journal of Social Work				2024-02-26	2024	2024-02-26	2024-05-16	54	3	846-865	All OA; Hybrid	Article	Cornish, Carlene	Cornish, Carlene (School of Social Work, University of East Anglia, Norwich NR4 7TJ, UK)	Cornish, Carlene (University of East Anglia)	Cornish, Carlene (University of East Anglia)	3	3			https://academic.oup.com/bjsw/advance-article-pdf/doi/10.1093/bjsw/bcae027/56761161/bcae027.pdf	https://app.dimensions.ai/details/publication/pub.1169207250	44 Human Society; 4405 Gender Studies; 4409 Social Work
87	1518	pub.1172119628	10.1177/21582440241255740			Integrating Indigenous Knowledge Into Rural Social Work: A Community-Led Study in Ninghua, Fujian, China	The main objective of this study was to examine the integration of indigenous knowledge (IK) into the rapidly developing field of rural social work in China. The study demonstrated the incorporation of indigenous elements such as folkways, power structures, values, norms, traditions, and crafts into the practice through collaboration with the local community. The research employed purposive sampl…	None.	Funding The author(s) disclosed receipt of the following financial support for the research, authorship, and/or publication of this article: This article is a result of the Fujian Province Social Science Fund project, with approval number FJ2022C101, and is also supported by the National Fund Cultivation Program project SP2023006 at Jimei University.	SAGE Open				2024-04	2024	2024-05-27	2024-04	14	2	21582440241255740	All OA; Gold	Article	Shanshan, Hong; Islam, M. Rezaul	Shanshan, Hong (Jimei University, Xiamen, China); Islam, M. Rezaul (University of Dhaka, Dhaka, Bangladesh)	Shanshan, Hong (Jimei University)	Shanshan, Hong (Jimei University); Islam, M. Rezaul (University of Dhaka)	0	0			https://journals.sagepub.com/doi/pdf/10.1177/21582440241255740	https://app.dimensions.ai/details/publication/pub.1172119628	44 Human Society; 4409 Social Work	4 Quality Education
88	1490	pub.1085346818	10.1080/17525098.2017.1300338			Green social work and its implications for social development in China	Green social work has been significant in introducing new issues into environmental debates and increasing its centrality to social work practice. These have included: the mainstreaming of environmental considerations; a widening of the theoretical and practice base to ensure that social and environmental justice are considered integral to any environmental involvement by social workers; highligh…	The authors would like to thank Durham University’s Institute of Advanced Study and European Union for supporting their research collaboration under the Durham International Senior Research Fellowship Scheme. Acknowledgement is also given to Li and Fung Foundation’s financial support for Hok Bun Ku’s social economy research in Mainland China.	This work was supported by the Hok Bun Ku’s social economy research in Mainland China	China Journal of Social Work				2017-01-02	2017	2017-05-03	2017-01-02	10	1	3-22	All OA; Green	Article	Dominelli, Lena; Ku, Hok-bun	Dominelli, Lena (School of Applied Social Sciences, Durham University, Durham, UK); Ku, Hok-bun (Department of Applied Social Sciences, The Hong Kong Polytechnic University, Hong Kong, China)	Ku, Hok-bun (Hong Kong Polytechnic University)	Dominelli, Lena (Durham University); Ku, Hok-bun (Hong Kong Polytechnic University)	26	5		8.68	http://ira.lib.polyu.edu.hk/bitstream/10397/71106/1/Dominelli_Green_Social_Work.pdf	https://app.dimensions.ai/details/publication/pub.1085346818	44 Human Society; 4407 Policy and Administration; 4409 Social Work; 4410 Sociology	11 Sustainable Cities and Communities
89	1423	pub.1114505062	10.1080/13691457.2019.1608911			Acculturation theory, cultural competency and learning from differences: reflections from a European short student mobility program	There is a growing recognition that in an increasingly differentiated social environment it is important for social workers to be prepared to intervene in multi-diversified and multicultural contexts, so as to promote inclusion, respect and empowerment. On this account, mobility and full immersion programmes appear to contribute the most promising professional learning opportunities. However, ful…	We are grateful to all the organisers, staff and students who took part with enthusiasm in the Tachy-we programme, and whose ideas and reflections provided an inspiration for this paper. We particularly thank Prof. Dorothy Zinn, who co-conducted the focus groups and whose notes were precious, and Valentina Gobbet Bamber who patiently read the paper and helped us significantly with the English edi…		European Journal of Social Work				2019-05-16	2019	2019-05-16	2020-09-02	23	5	849-861	All OA; Green	Article	Fargion, Silvia; Nuttman-Shwartz, Orit	Fargion, Silvia (Department of Psychology and Cognitive Science, The University of Trento, Rovereto, Italy); Nuttman-Shwartz, Orit (School of Social Work, Sapir College, Sderot, Israel)	Fargion, Silvia (University of Trento)	Fargion, Silvia (University of Trento); Nuttman-Shwartz, Orit (Sapir College)	6	3		2.63	https://iris.unitn.it/bitstream/11572/243444/1/Acculturation%20Theory%20march%202019.docx%2014032019.pdf	https://app.dimensions.ai/details/publication/pub.1114505062	44 Human Society; 4409 Social Work
90	1411	pub.1157136666	10.1177/14680173231166830			The myth of spirituality	This article is designed to open a conversation about the place of spirituality in social work, highlight possible ethical issues, and question whether spirituality, as defined by social work and popular culture, is an immutable part of human development. Additionally, the role of social work in conducting spiritual assessments and interventions is specifically challenged, along with examples of …		Funding The author received no financial support for the research, authorship, and/or publication of this article. Declaration of Conflicting Interests The author declared no potential conflicts of interest with respect to the research, authorship, and/or publication of this article.	Journal of Social Work				2023-04-09	2023	2023-04-09	2023-11	23	6	1005-1021	All OA; Hybrid	Article	Taylor, Edward H	Taylor, Edward H (School of Social Work, University of British Columbia, Okanagan Campus, Canada)	Taylor, Edward H (University of British Columbia)	Taylor, Edward H (University of British Columbia)	9	8		15.72	https://journals.sagepub.com/doi/pdf/10.1177/14680173231166830	https://app.dimensions.ai/details/publication/pub.1157136666	44 Human Society; 4409 Social Work	3 Good Health and Well Being
91	1403	pub.1128295863	10.22329/csw.v12i1.5845			Canadian identity:	This paper is in response to recent calls to conceptualize and articulate Canadian perspectives and experiences in international social work, given that the Canadian standpoint has been lacking in international social work literature. This paper contends that it is imperative, first of all, to critically examine and unpack our ‘Canadian’ identity in order to practice international work that is so…			Critical Social Work				2019-05-15	2019	2019-05-15		12	1		All OA; Gold	Article	Hiranandani, Vanmala	Hiranandani, Vanmala (Associate Professor, Jamsetji Tata Centre for Disaster Management, Tata Institute of Social Sciences, Deonar, Mumbai, India)		Hiranandani, Vanmala (Tata Institute of Social Sciences)	1	0		0.44	https://ojs.uwindsor.ca/index.php/csw/article/download/5845/4815	https://app.dimensions.ai/details/publication/pub.1128295863	44 Human Society; 4409 Social Work
92	1402	pub.1004763805	10.1080/02615479.2014.977630			Learning from the Research Process: Discussing Sensitive Topics as a Cultural Outsider	This paper explores the sensitivities and cultural complexities of engaging in research about substance use with a Sikh Punjabi community in England, from the perspective of cultural outsiders. The objective of the research was to explore the feasibility of developing a Community Alcohol Support Package (CASP) within the community, where existing alcohol service provision was felt to be limited, …	The authors would like to thank Aquarius Action Projects for funding the research and Shaheen Chaudhry and Iqbal Sandhu for their assistance in conducting various aspects of the project. They would also like to thank the Project Advisory Group and the wider group of individuals who helped us at various stages of the research process. In particular, our gratitude is extended to the participants an…		Social Work Education				2014-11-19	2014	2014-11-19	2015-02-17	34	2	199-212	All OA; Green	Article	Manders, Gary; Galvani, Sarah	Manders, Gary (University of Bedfordshire, Gary Manders & Sarah Galvani, UK); Galvani, Sarah (University of Bedfordshire, Gary Manders & Sarah Galvani, UK)	Manders, Gary (University of Bedfordshire)	Manders, Gary (University of Bedfordshire); Galvani, Sarah (University of Bedfordshire)	4	1		1.08	https://e-space.mmu.ac.uk/594612/1/Learning%20from%20the%20research%20process%20FINAL%20revised%2019%20August%202014%20bak.pdf	https://app.dimensions.ai/details/publication/pub.1004763805	44 Human Society; 4409 Social Work	3 Good Health and Well Being
93	1395	pub.1142042611	10.15270/57-4-971			VATSONGA PEOPLE’S PERCEPTIONS OF CHILDREN’S RIGHTS	This article is based on the findings of a qualitative study that explored the Vatsonga people’s perceptions of children’s rights to protection. Semi-structured interviews were conducted with 40 community-based participants and 11child protection social workers who were familiar with the Vatsonga people's cultural heritage. Key informant and snowball sampling techniques were employed to select th…			Social Work/Maatskaplike Werk				2021	2021	2021	2021	57	4	472	All OA; Gold	Article	Simbine, Lisenga; Le Roux, Liana	Simbine, Lisenga (Pretoria University); Le Roux, Liana (University of Pretoria)		Simbine, Lisenga (University of Pretoria); Le Roux, Liana (University of Pretoria)	2	0		1.23	https://socialwork.journals.ac.za/pub/article/download/971/852	https://app.dimensions.ai/details/publication/pub.1142042611	44 Human Society; 4409 Social Work	16 Peace, Justice and Strong Institutions
94	1394	pub.1054964109	10.1017/jrc.2016.8			Creating Culturally Safe Vocational Rehabilitation Services for Indigenous Australians: A Brief Review of the Literature	This article reviews the research evidence on vocational rehabilitation services and rehabilitation counselling practice with Indigenous Australians. It applied a context sensitive, cultural safety and reflexivity approach to construct salient themes from the research evidence. Findings suggest Indigenous Australians with disabilities experience significant ‘double-disadvantage’, and that vocatio…	This literature review was completed as part of a research scholarship programme in the School of Human Services and Social Work, Griffith University. The team consisted of Master of Rehabilitation Counselling student, Natalie Taylor, Master of Rehabilitation Counselling student and descendant of the Kamilaroi people, Amanda Rachow, Master of Philosophy student, qualified social worker and descen…		Australian Journal of Rehabilitation Counselling				2016-11-09	2016	2016-11-09	2016-12	22	2	93-103	All OA; Bronze	Article	McLennan, Vanette; Taylor, Natalie; Rachow, Amanda; South, Grant; Chapman, Kelsey	McLennan, Vanette (School of Allied Health Sciences, Griffith University and Menzies Health Institute Queensland, Gold Coast Campus, Parklands Drive, Southport, QLD, 4222, Australia); Taylor, Natalie (School of Human Services and Social Work, Griffith University, Gold Coast Campus, Parklands Drive, Southport, QLD, 4222, Australia); Rachow, Amanda (School of Human Services and Social Work, Griffit…	McLennan, Vanette (Griffith University)	McLennan, Vanette (Griffith University); Taylor, Natalie (Griffith University); Rachow, Amanda (Griffith University); South, Grant (Griffith University); Chapman, Kelsey (Griffith University)	2	0		0.56	https://www.cambridge.org/core/services/aop-cambridge-core/content/view/4B2C8C5B3EB8420AED98FB510B6C3238/S1323892216000089a.pdf/div-class-title-creating-culturally-safe-vocational-rehabilitation-services-for-indigenous-australians-a-brief-review-of-the-literature-div.pdf	https://app.dimensions.ai/details/publication/pub.1054964109	44 Human Society; 4409 Social Work
95	1386	pub.1053490640	10.1177/0020872813481992			Rising to the occasion: Disaster social work in China	The fifth year since the deadly Wenchuan earthquake that killed more than 87,000 people will be commemorated in 2013. This article critically reviews the development and charts the direction of disaster social work in China, since the fateful 2008 Wenchuan earthquake jump-started it dramatically. While disaster social work publications, social work projects and organizations surged, young Chinese…			International Social Work				2013-05-02	2013	2013-05-02	2013-07	56	4	544-562	All OA; Green	Article	Sim, Timothy; Ki, Angelina Yuen-Tsang Woon; Quen, Chen Hui; Dong, Qi Hua	Sim, Timothy (The Hong Kong Polytechnic University, Hong Kong); Ki, Angelina Yuen-Tsang Woon (The Hong Kong Polytechnic University, Hong Kong); Quen, Chen Hui (Chengdu University of Information and Technology, China); Dong, Qi Hua (Sichuan Agricultural University, China)	Sim, Timothy (Hong Kong Polytechnic University)	Sim, Timothy (Hong Kong Polytechnic University); Ki, Angelina Yuen-Tsang Woon (Hong Kong Polytechnic University); Quen, Chen Hui (Chengdu University of Information Technology); Dong, Qi Hua (Sichuan Agricultural University)	23	2		6.04	http://ira.lib.polyu.edu.hk/bitstream/10397/6948/1/ISW%20Draft%206_20130206_Accepted%20all%20changes.pdf	https://app.dimensions.ai/details/publication/pub.1053490640	44 Human Society; 4409 Social Work
96	1371	pub.1141335841	10.18060/24472			Moving From Multiculturalism to Critical Race Theory Within a School of Social Work: Dismantling White Supremacy as an Organizing Strategy	The continued presence of racism and white supremacy has risen to a crisis level as today’s global pandemic, police abuse targeting Black, Indigenous and other people of color (BIPOC) communities, and mass urban uprisings rock the nation. This article presents a case study of a West Coast school of social work that has carried out a five-year systematic campaign to move all levels of the program …			Advances in Social Work				2021-09-23	2021	2021-09-23		21	2/3	876-897	All OA; Gold	Article	Polk, Saanà A.; Vazquez, Nicole; Kim, Mimi E.; Green, Yolanda R.	Polk, Saanà A. (School of Social Work, California State University, Long Beach); Vazquez, Nicole (Vazquez Consulting); Kim, Mimi E. (School of Social Work, California State University, Long Beach); Green, Yolanda R. (School of Social Work, California State University, Long Beach)		Polk, Saanà A. (California State University, Long Beach); Vazquez, Nicole (Vazquez Consulting); Kim, Mimi E. (California State University, Long Beach); Green, Yolanda R. (California State University, Long Beach)	8	3		4.92	https://journals.iupui.edu/index.php/advancesinsocialwork/article/download/24472/23878	https://app.dimensions.ai/details/publication/pub.1141335841	44 Human Society; 4409 Social Work
97	1356	pub.1153784888	10.1080/02615479.2022.2155129			Indigenous services leading the way for Aboriginal and Torres Strait Islander children in out-of-home care	Concern exists that the growing over-representation of Aboriginal and Torres Strait Islander children and young people in out-of-home care (OOHC) across Australia is perpetuating historical, discriminatory child removal policies and practices. The disproportionate number of Indigenous children in OOHC is increasing at the same time as growing multi-jurisdictional policy and legal mandate for Indi…	The research team sincerely thanks all participants and Central Queensland Indigenous Development (CQID) for their support of this research, as well as Dr Pedro Fidelman, A/Director, Centre for Policy Futures, The University of Queensland. The research team also gratefully acknowledges the Australian Institute of Aboriginal and Torres Strait Islander Studies (AIATSIS) that funded this research (g…	This research was provided by the Australian Institute of Aboriginal and Torres Strait Islander Studies (AIATSIS) (grant award ref: IRE_OR00061).	Social Work Education				2022-12-18	2022	2022-12-18	2024-05-18	43	4	913-937	All OA; Hybrid	Article	Creamer, Sandra; Blair, Suzi; Toombs, Maree; Brolan, Claire E	Creamer, Sandra (Centre for Policy Futures, The University of Queensland, Brisbane, Australia); Blair, Suzi (Central Queensland Indigenous Development, Rockhampton, Australia); Toombs, Maree (School of Public Health, The University of Queensland, Herston, Brisbane, Australia); Brolan, Claire E (Centre for Policy Futures, The University of Queensland, Brisbane, Australia; School of Public Health, …	Brolan, Claire E (University of Queensland; University of Queensland)	Creamer, Sandra (University of Queensland); Blair, Suzi (Central Queensland Indigenous Development, Rockhampton, Australia); Toombs, Maree (University of Queensland); Brolan, Claire E (University of Queensland; University of Queensland)	6	5		4.46	https://www.tandfonline.com/doi/pdf/10.1080/02615479.2022.2155129	https://app.dimensions.ai/details/publication/pub.1153784888	39 Education; 3904 Specialist Studies In Education; 44 Human Society; 4409 Social Work	16 Peace, Justice and Strong Institutions
98	1355	pub.1149862496	10.3390/socsci11080336			Promoting Environmental Justice and Sustainability in Social Work Practice in Rural Community: A Systematic Review	Social work’s response to global climate change has dramatically increased over the last several years. Similarly, growing attention has been paid to rural social work; less clear, however, is how social work, responsive to global climate change, is developed, deployed, and understood in rural contexts; this systematic review elaborates on current social work contributions (research, practice, an…		This research was undertaken, in part, thanks to funding from the Vice-President Research & Innovation International Seed Fund, Dalhousie University.	Social Sciences				2022-07-28	2022	2022-07-28		11	8	336	All OA; Gold	Article	Wu, Haorui; Greig, Meredith; Bryan, Catherine	Wu, Haorui (School of Social Work, Dalhousie University, Halifax, NS B3H 4R2, Canada); Greig, Meredith (School of Social Work, Dalhousie University, Halifax, NS B3H 4R2, Canada); Bryan, Catherine (School of Social Work, Dalhousie University, Halifax, NS B3H 4R2, Canada)	Wu, Haorui (Dalhousie University)	Wu, Haorui (Dalhousie University); Greig, Meredith (Dalhousie University); Bryan, Catherine (Dalhousie University)	22	17		24.79	https://www.mdpi.com/2076-0760/11/8/336/pdf?version=1659013777	https://app.dimensions.ai/details/publication/pub.1149862496	44 Human Society; 4409 Social Work	11 Sustainable Cities and Communities; 13 Climate Action
99	1352	pub.1131629960	10.15270/56-4-882			AFRICAN SPIRITUALITY: UNEARTHING BELIEFS AND PRACTICES FOR THE HELPING PROFESSIONS	Empirical work related to African spirituality in the social sciences, particularly within the social work context, is sparse. It is crucial that practitioners have a deeper understanding of the beliefs and practices that can support therapeutic goals in practice. Using qualitative research methodology, 20 child and youth care students at a selected university in South Africa, who are proponents …			Social Work/Maatskaplike Werk				2020-10	2020	2020-10		56	4	403	All OA; Gold	Article	Singh, Charlene; Bhagwan, Raisuyah	Singh, Charlene (Durban University of Technology); Bhagwan, Raisuyah (Durban University of Technology)		Singh, Charlene (Durban University of Technology); Bhagwan, Raisuyah (Durban University of Technology)	19	10		8.47	https://socialwork.journals.ac.za/pub/article/download/882/773	https://app.dimensions.ai/details/publication/pub.1131629960	44 Human Society; 4409 Social Work
100	1333	pub.1169490579	10.46303/ressat.2024.14			Exploring Ubuntu Philosophy as a Foundation for Holistic School Social Work in South Africa	This conceptual paper examines the integration of Ubuntu philosophy into school social work practice in South Africa, proposing a transformative framework rooted in interconnectedness, compassion, and community. Drawing from critical social work theories, cultural humility, and restorative justice, the study explores the potential benefits of incorporating Ubuntu in addressing the diverse needs o…			Research in Social Sciences and Technology				2024-03-06	2024	2024-03-06		9	1	253-264	All OA; Gold	Article	Boboyi, Asanda	Boboyi, Asanda (Department of Social Work, Faculty of Law, Humanities, and Social Sciences, Walter Sisulu University, Mthatha, South Africa)		Boboyi, Asanda (Walter Sisulu University)	9	9			https://ressat.org/index.php/ressat/article/download/803/213	https://app.dimensions.ai/details/publication/pub.1169490579	44 Human Society; 4409 Social Work
101	1333	pub.1169411819	10.1007/s10615-024-00927-0			Chinese Social Work Students’ Attitudes toward Online Social Work Services: A Q Methodology Study	During the COVID-19 pandemic in China, the emergence of online social work services has garnered the attention of scholars, particularly as social work students are the future practitioners who will be responsible for delivering these services. This Q methodology study aimed to explore the perceptions and attitudes of 39 Master of Social Work (MSW) students (76.92% female, 23.08% male, Age(mean) …		No funding was sought for this study.	Clinical Social Work Journal				2024-03-04	2024	2024-03-04	2025-06	53	2	166-179	All OA; Hybrid	Article	Wang, Qi; Li, Jia; Zhou, Xiaochen	Wang, Qi (School of Graduate Studies & Institute of Policy Studies, HKSAR, MB205, Lee Wan Keung Academic Building, 8 Castle Peak Road, Tuen Mun, New Territories, Hong Kong, HKSAR, China; College of Philosophy, Law & Political Science, Shanghai Normal University, Shanghai, China); Li, Jia (Department of Social Work, Faculty of Social Science, The Chinese University of Hong Kong, Level 4, T.C. Chen…	Zhou, Xiaochen (University of Hong Kong)	Wang, Qi (School of Graduate Studies & Institute of Policy Studies, HKSAR, MB205, Lee Wan Keung Academic Building, 8 Castle Peak Road, Tuen Mun, New Territories, Hong Kong, HKSAR, China; Shanghai Normal University); Li, Jia (Chinese University of Hong Kong); Zhou, Xiaochen (University of Hong Kong)	0	0			https://link.springer.com/content/pdf/10.1007/s10615-024-00927-0.pdf	https://app.dimensions.ai/details/publication/pub.1169411819	44 Human Society; 4409 Social Work
102	1324	pub.1174294688	10.46303/jcve.2024.21			Sexual Orientation Hiccups Surrounding Traditional Male Circumcision (Ulwaluko) in the South African Context: Implications for Social Work	Incontrovertibly, ulwaluko (traditional male circumcision) remains one of the essential rituals in developing an individual’s growth and construction of social identity, yet one of the ancient and patriarchal cultures. While some studies have been done on the experiences of homophobia by the LGBTQIA undergoing ulwaluko, there is a dearth of research on how social work professionals can intervene …			Journal of Culture and Values in Education				2024-07-31	2024	2024-07-31		7	2	230-245	All OA; Gold	Article	Kasa, Luvo	Kasa, Luvo (Walter Sisulu University)		Kasa, Luvo (Walter Sisulu University)	0	0			https://doi.org/10.46303/jcve.2024.21	https://app.dimensions.ai/details/publication/pub.1174294688	44 Human Society; 4405 Gender Studies; 4409 Social Work
103	1314	pub.1175769303	10.1093/bjsw/bcae147			Work with People in Mental Distress Who Access Spirituality/Religion	Abstract When social workers assist people in mental distress, complexity is added if clients self-identify as spiritual/religious. It can be challenging to know how to proceed in a helpful manner. Issues related to understanding what people are going through and how best to assist are centrally important for social workers to consider. To explore these concerns, we examine key social work ideas …		None declared.	The British Journal of Social Work				2024-09-16	2024	2024-09-16	2025-01-01	55	1	401-418	All OA; Hybrid	Article	Smith, Stewart J; Read, Julia	Smith, Stewart J (Department of Social Work, Wilfrid Laurier University, Kitchener, N2H 6P6, Ontario, Canada); Read, Julia (Department of Social Work, Wilfrid Laurier University, Kitchener, N2H 6P6, Ontario, Canada)	Smith, Stewart J (Wilfrid Laurier University)	Smith, Stewart J (Wilfrid Laurier University); Read, Julia (Wilfrid Laurier University)	0	0			https://doi.org/10.1093/bjsw/bcae147	https://app.dimensions.ai/details/publication/pub.1175769303	44 Human Society; 4409 Social Work	3 Good Health and Well Being
104	1299	pub.1050544624	10.1111/j.1468-2397.2008.00574.x			The professionalisation of social work: a cross‐national exploration	This article compares the professional features of social work in ten countries. It is based on detailed descriptions of the professional features of social work in Chile, Germany, Hungary, India, Mexico, South Africa, Spain, Sweden, the UK and the USA. Social work in these countries is discussed in terms of eight features, chosen as marks of a profession on the basis of the ‘attributes’ and ‘pow…	The authors gratefully acknowledge the contribution of the country researchers: Teresa Matus, Malvina Ponce de León, Silvia Staub‐Bernasconi, Ágnes Darvas, Judit Kozma, J. S. Gunavathy, José Guillermo Zúñiga Zárate, Guillermina Garza Treviño, Tembeka Mpako‐Ntusi, Aurora Castillo Charfolet, Sven Hessle, Malcolm Payne, Terry Mizrahi, and Elizabeth J. Clark.		International Journal of Social Welfare				2008-08-27	2008	2008-08-27	2008-10	17	4	281-290	All OA; Bronze	Article	Weiss‐Gal, Idit; Welbourne, Penelope	Weiss‐Gal, Idit (Bob Shapell School of Social Work, Tel‐Aviv University, Israel); Welbourne, Penelope (Department of Social Policy and Social Work, University of Plymouth, UK)		Weiss‐Gal, Idit (Tel Aviv University); Welbourne, Penelope (University of Plymouth)	158	15		43.08	https://onlinelibrary.wiley.com/doi/pdfdirect/10.1111/j.1468-2397.2008.00574.x	https://app.dimensions.ai/details/publication/pub.1050544624	44 Human Society; 4409 Social Work	4 Quality Education
105	1296	pub.1126723769	10.1016/j.childyouth.2020.105019			The role of decision making in the over-representation of Aboriginal and Torres Strait Islander children in the Australian child protection system	The over-representation of Aboriginal and Torres Strait Islander children in the child protection is a serious concern in Australia. A proportion of this group of children may have been removed from families who are providing an adequately safe and nurturing environment, reflecting false positive errors in decision making. Assuming this to be true, we draw on the decision-making ecology model of …	Declaration of Competing Interest PH is the co-developer of the Parents under Pressure (PuP) program. The PuP program is owned and disseminated by Griffith University. Proceeds from dissemination are distributed in accordance with Griffith University policy. Surplus funds from training contracts are used to support research activities associated with the PuP program. GF has no conflicts of intere…		Children and Youth Services Review				2020-06	2020		2020-06	113		105019	All OA; Green	Article	Harnett, Paul H.; Featherstone, Gerald	Harnett, Paul H. (Griffith University, Australia); Featherstone, Gerald (Kummara Association Incorporated, Australia)	Harnett, Paul H. (Griffith University)	Harnett, Paul H. (Griffith University); Featherstone, Gerald (Kummara Association Incorporated, Australia)	25	9		10.19	https://research-repository.griffith.edu.au/bitstreams/67264206-c200-44de-80e1-1d7f793a1f85/download	https://app.dimensions.ai/details/publication/pub.1126723769	44 Human Society; 4409 Social Work; 4410 Sociology
106	1285	pub.1134472879	10.26522/ssj.v14i2.2215			Narrating Colonial Silences: Racialized Social Work Educators Unsettling our Settlerhood	In this paper, three racialized social work educators unsettle our settled colonial silences as acts of self-decolonization and as a way of responding to the call to action by the Truth and Reconciliation Commission of Canada (TRC). Hailing from the uneven manifestations of global capitalism and coloniality in Morocco, Vietnam, and Ethiopia, we draw on various critical theories to interrogate our…			Studies in Social Justice				2021-01-06	2021	2021-01-06		14	2	287-305	All OA; Gold	Article	Elkchirid, Abdelfettah; Ngo, Anh Phung; Kumsa, Martha Kuwee	Elkchirid, Abdelfettah (Wilfrid Laurier University); Ngo, Anh Phung (Wilfrid Laurier University); Kumsa, Martha Kuwee (Wilfrid Laurier University)		Elkchirid, Abdelfettah (Wilfrid Laurier University); Ngo, Anh Phung (Wilfrid Laurier University); Kumsa, Martha Kuwee (Wilfrid Laurier University)	5	1		3.07	https://journals.library.brocku.ca/index.php/SSJ/article/download/2215/1915	https://app.dimensions.ai/details/publication/pub.1134472879	44 Human Society; 4409 Social Work	16 Peace, Justice and Strong Institutions
107	1280	pub.1148766835	10.1177/10497315221109486			Clinical Social Work Practice in Canada: A Critical Examination of Regulation	Purpose: The most common form of social work (SW) practice in Canada is clinical which requires specialized knowledge and advanced clinical skills. The SW profession is more than 100 years old, but regulation is new to Canada and presently most jurisdictions have regulatory bodies to advance safe, competent, and ethical practices. Regulatory bodies establish admission requirements, standards of p…		FundingThe author(s) received no financial support for the research, authorship, and/or publication of this article.	Research on Social Work Practice				2022-06-16	2022	2022-06-16	2023-01	33	1	15-28	All OA; Hybrid	Article	Kourgiantakis, Toula; Ashcroft, Rachelle; Mohamud, Faisa; Benedict, Alison; Lee, Eunjung; Craig, Shelley; Sewell, Karen; Johnston, Marjorie; McLuckie, Alan; Sur, Deepy	Kourgiantakis, Toula (Factor-Inwentash Faculty of Social Work, University of Toronto, Toronto, ON, CA); Ashcroft, Rachelle (Factor-Inwentash Faculty of Social Work, University of Toronto, Toronto, ON, CA); Mohamud, Faisa (Factor-Inwentash Faculty of Social Work, University of Toronto, Toronto, ON, CA); Benedict, Alison (); Lee, Eunjung (Factor-Inwentash Faculty of Social Work, University of Toron…	Kourgiantakis, Toula (University of Toronto)	Kourgiantakis, Toula (University of Toronto); Ashcroft, Rachelle (University of Toronto); Mohamud, Faisa (University of Toronto); Benedict, Alison (); Lee, Eunjung (University of Toronto); Craig, Shelley (University of Toronto); Sewell, Karen (Carleton University); Johnston, Marjorie (Dalhousie University); McLuckie, Alan (University of Calgary); Sur, Deepy (Ontario Association of Social Workers,…	12	8		13.52	https://journals.sagepub.com/doi/pdf/10.1177/10497315221109486	https://app.dimensions.ai/details/publication/pub.1148766835	44 Human Society; 4409 Social Work	4 Quality Education
108	1277	pub.1168490925	10.1002/ev.20578			Setting the stage: A selected oral history of culturally responsive evaluation	Abstract Dr. Hood was the first culturally responsive evaluation oral historian. For justice, culture, and equity to be mainstreamed, he understood that these concepts must be conveyed in multiple formats, settings, and arenas. He authentically brought what had been in the minds, hearts, tongues, and work of many before him to the written word—he expanded and authenticated history. We, the volume…	ACKNOWLEDGMENTS Thank you to Dr. Karen Kirkart for her reviews, edits, and extensive feedback on this article. Dr. Rodney Hopson, thank you for suggestions around article structure. Thank you to all CRE oral historians who spoke with us and shared their memories and refections.		New Directions for Evaluation				2023-12	2023	2024-02-02	2023-12	2023	180	15-25	All OA; Hybrid	Article	Boyce, Ayesha S.; Bowman, Nicole R.; Hall, Melvin E.; Neubauer, Leah C.	Boyce, Ayesha S. (Division of Educational Leadership and Innovation, Mary Lou Fulton Teachers College, Arizona State University, Tempe, Arizona, USA); Bowman, Nicole R. (Bowman Performance Consulting and Wisconsin Evaluation Collaborative, the University of Wisconsin‐Madison, Shawano, Wisconsin, USA); Hall, Melvin E. (Department of Educational Psychology, Northern Arizona University, Phoenix, Ari…	Boyce, Ayesha S. (Arizona State University)	Boyce, Ayesha S. (Arizona State University); Bowman, Nicole R. (University of Wisconsin–Madison); Hall, Melvin E. (Northern Arizona University); Neubauer, Leah C. (Northwestern University)	5	5		6.94	https://onlinelibrary.wiley.com/doi/pdfdirect/10.1002/ev.20578	https://app.dimensions.ai/details/publication/pub.1168490925	44 Human Society; 4404 Development Studies; 4409 Social Work
109	1269	pub.1032356943	10.1007/s10615-014-0484-3			Preparing MSW Students for Integrative Mind–Body-Spirit Practice	Abstract Knowledge of new developments in social work education supports clinical practitioners’ professional development and their supervision of students and early career social workers. Integrative mind–body-spirit (IMBS) practice is a holistic paradigm that is emerging in social work education and the profession. IMBS modalities have a growing evidence base and are congruent with the healing …			Clinical Social Work Journal				2014-03-16	2014	2014-03-16	2014-09	42	3	288-301	All OA; Bronze	Article	Raheim, Salome; Lu, Jack J.	Raheim, Salome (School of Social Work, University of Connecticut, 1798 Asylum Avenue, 06117, West Hartford, CT, USA); Lu, Jack J. (School of Social Work, University of Connecticut, 1798 Asylum Avenue, 06117, West Hartford, CT, USA)	Raheim, Salome (University of Connecticut)	Raheim, Salome (University of Connecticut); Lu, Jack J. (University of Connecticut)	21	3		5.69	https://link.springer.com/content/pdf/10.1007/s10615-014-0484-3.pdf	https://app.dimensions.ai/details/publication/pub.1032356943	44 Human Society; 4409 Social Work	4 Quality Education
110	1269	pub.1025690927	10.1177/2158244014538640			Social Work Practice With Local Communities in Developing Countries	The article discusses some features of social work, broad community practice trends, and imperatives for political engagement in local communities in developing countries. Drawing on secondary data and the author’s observations and research on community development in developing countries, it addresses an important question: Do social workers practice in local communities generally, and particula…		Funding The author(s) received no financial support for the research and/or authorship of this article.	SAGE Open				2014-01-01	2014	2014-06-12	2014-01-01	4	2	2158244014538640	All OA; Gold	Article	Pawar, Manohar	Pawar, Manohar (Charles Sturt University, Wagga Wagga, Australia)	Pawar, Manohar (Charles Sturt University)	Pawar, Manohar (Charles Sturt University)	35	8		9.48	https://journals.sagepub.com/doi/pdf/10.1177/2158244014538640	https://app.dimensions.ai/details/publication/pub.1025690927	44 Human Society; 4409 Social Work	11 Sustainable Cities and Communities
111	1269	pub.1188957203	10.4314/ajsw.v14i6.6			Social protection measures utilised by older widows in Kamuli, Uganda: An African feminist perspective	Globally, social protection has become a key policy trend to afford the ‘greying’ population an opportunity to age with dignity amidst escalating nutrition and health care costs. As people are living longer, countries are increasingly urged to come up with concrete social protection measures that will promote equal opportunities particularly for older persons. Despite the progress made by the Uga…			African Journal of Social Work				2024-12-12	2024	2024-12-12		14	6	351-360	All OA; Gold	Article	ATWINE, Deborah; SOBANTU, Mziwandile	ATWINE, Deborah (PhD, Department of Sociology, Kyambogo University); SOBANTU, Mziwandile (PhD, University of Johannesburg, University of Johannesburg)		ATWINE, Deborah (Kyambogo University); SOBANTU, Mziwandile (University of Johannesburg)	0	0			https://doi.org/10.4314/ajsw.v14i6.6	https://app.dimensions.ai/details/publication/pub.1188957203	44 Human Society; 4404 Development Studies; 4409 Social Work	1 No Poverty
112	1265	pub.1157854898	10.1080/02615479.2023.2208147			Social work education as foreign policy: an Israeli school of social work in Kenya in the 1960s	The global growth of social work entailed the transnational translation of professional knowledge and practice, primarily through social work education. The difficulties involved in this process are evident in a case study of an Israeli initiative to establish a school of social work in Kenya in the early 1960s. The school was opened in 1962 and remained active for most of the decade. Its establi…	I am very grateful to the encouragement and support of Tamar Maroz in the preparation of this article.		Social Work Education				2023-05-08	2023	2023-05-08	2024-08-17	43	6	1609-1622	All OA; Hybrid	Article	Gal, John	Gal, John (Baerwald School of Social Work and Social Welfare, Hebrew University of Jerusalem, Jerusalem, Israel)	Gal, John (Hebrew University of Jerusalem)	Gal, John (Hebrew University of Jerusalem)	0	0		0	https://www.tandfonline.com/doi/pdf/10.1080/02615479.2023.2208147?needAccess=true&role=button	https://app.dimensions.ai/details/publication/pub.1157854898	44 Human Society; 4409 Social Work	4 Quality Education
113	1264	pub.1154033858	10.1080/09503153.2022.2155944			Practitioner Perspectives on Child Feeding in Uganda: Community Engagement through the Global Agenda	This collaborative research study arose in response to the United Nations Sustainable Development Goals 2 and 3, which have amongst their targets an aim to eradicate preventable deaths in children under five years old. The research is founded on the aims of the Global Agenda for Social Work and Social Development which aims at strengthening the social work profession through linkages between glob…	We would like to thank the URCS practitioners for their invaluable contributions to this project.	This work was supported by the Northumbria University QR GCRF Pump Priming Extension Call under Grant 513281.	Practice				2022-12-28	2022	2022-12-28	2024-03-14	36	2	143-158	All OA; Hybrid	Article	McBride, Amanda; Graham, Pamela Louise; Mugyisha, Alex; McInnes, Alison	McBride, Amanda (); Graham, Pamela Louise (); Mugyisha, Alex (); McInnes, Alison ()		McBride, Amanda (); Graham, Pamela Louise (); Mugyisha, Alex (); McInnes, Alison ()	0	0		0	https://doi.org/10.1080/09503153.2022.2155944	https://app.dimensions.ai/details/publication/pub.1154033858	44 Human Society; 4409 Social Work
114	1254	pub.1184249304	10.1080/23311886.2024.2444469			Social work for a greener planet: reframing social work skills and education to mitigate the climate crisis	The warming of the planet and the currently increasing evidence of the climate crisis compel social workers to prepare themselves and their students to shoulder new roles and develop new models of education. This focused literature review provides the social work educator or activist with essential and suggested materials in order to teach and/or lead community projects in this area. It starts by…		This article was prepared with no funding and no sponsorship.	Cogent Social Sciences				2025-01-08	2025	2025-01-08	2025-12-31	11	1	2444469	All OA; Gold	Article	Cwikel, Julie	Cwikel, Julie (Emerita Spitzer Department of Social Work, The Center for Women’s Health Studies and Promotion, Member, The School for Sustainability and Climate Change, Ben Gurion University of the Negev)	Cwikel, Julie (Ben-Gurion University of the Negev)	Cwikel, Julie (Ben-Gurion University of the Negev)	0	0			https://doi.org/10.1080/23311886.2024.2444469	https://app.dimensions.ai/details/publication/pub.1184249304	44 Human Society; 4409 Social Work	13 Climate Action
115	1239	pub.1184507509	10.1016/j.childyouth.2025.108140			Taking a stand against racism: The urgent need for SAWUBONA in child protection and foster care social work	There is a distinct lack of research on the experiences of birth mothers who had their children removed by Children Protection Services. This article draws on qualitative research that was conducted in 2022–2023 with six ethnic minoritised mothers involved in children social work in England. Due to wordcount restrictions, the paper focuses on the narrative experiences of two birthmothers using Cr…	Declaration of competing interest The authors declare that they have no known competing financial interests or personal relationships that could have appeared to influence the work reported in this paper.		Children and Youth Services Review				2025-03	2025		2025-03	170		108140	All OA; Hybrid	Article	Cornish, Carlene	Cornish, Carlene (School of Social Work, University of East Anglia, Norwich, UK)	Cornish, Carlene (University of East Anglia)	Cornish, Carlene (University of East Anglia)	0	0			https://doi.org/10.1016/j.childyouth.2025.108140	https://app.dimensions.ai/details/publication/pub.1184507509	44 Human Society; 4409 Social Work
116	1234	pub.1137285756	10.18584/iipj.2021.12.1.10818			A Review of Literature on the Involvement of Children from Indigenous Communities in Anglo Child Welfare Systems: 1973-2018	A series of recent legal and policy developments in Canada have potential to contribute to reconciliation efforts, particularly related to the overrepresentation of Indigenous children in child welfare systems. However, systematic collection, analysis, and synthesis of research knowledge—particularly, research that is locally grounded—on Indigenous child welfare involvement is notably missing fro…			International Indigenous Policy Journal				2021-04-16	2021	2021-04-16		12	1	1-43	All OA; Gold	Article	Sinha, Vandna; Caldwell, Johanna; Paul, Leah; Fumaneri, Paulo Roberto	Sinha, Vandna (University of Colorado, Boulder, United States); Caldwell, Johanna (McGill University, Canada); Paul, Leah (McGill University, Canada); Fumaneri, Paulo Roberto (McGill University, Canada)		Sinha, Vandna (University of Colorado Boulder); Caldwell, Johanna (McGill University); Paul, Leah (McGill University); Fumaneri, Paulo Roberto (McGill University)	23	9		14.14	https://ojs.lib.uwo.ca/index.php/iipj/article/download/10818/11194	https://app.dimensions.ai/details/publication/pub.1137285756	44 Human Society; 4409 Social Work
117	1221	pub.1028683600	10.1177/0020872805053461			Chinese culture, social work education and research	English In the development of indigenous social work knowledge in China, the power relationship between teacher and student can act as a barrier to the development of scientific knowledge and practice research. Social work education and practice research in Chinese societies should focus on the empowerment of social work students, methodological pluralism and the development of a culturally speci…			International Social Work				2005-07-01	2005	2005-07-01	2005-07	48	4	381-389	All OA; Green	Article	Chan, Ko Ling; Chan, Cecilia L.W.	Chan, Ko Ling (Department of Social Work and Social Administration, The University of Hong Kong, Pokfulam, Hong Kong,); Chan, Cecilia L.W. (Department of Social Work and Social Administration, The University of Hong Kong, Pokfulam, Hong Kong)		Chan, Ko Ling (University of Hong Kong); Chan, Cecilia L.W. (University of Hong Kong)	47	2		11.86	http://hdl.handle.net/10722/82207	https://app.dimensions.ai/details/publication/pub.1028683600	44 Human Society; 4409 Social Work
118	1220	pub.1152627268	10.18060/24973			Educating Bilingual Social Workers for the Child Welfare Workforce: A Distributive Justice Approach	Spanish/English bilingual (SEB) speaking social workers are in high demand, particularly in the area of Child Welfare. Most require training and institutional support to increase their cultural and linguistic competence, yet the majority receive no specific education or support. As a result, many encounter inequities in the workforce. Research points to several elements that are essential to the …			Advances in Social Work				2022-11-08	2022	2022-11-08		22	2	499-516	All OA; Gold	Article	Rozas, Lisa Werkmeister; Marrero-Johnson, Milagros; Davis, Tracy	Rozas, Lisa Werkmeister (University of Connecticut); Marrero-Johnson, Milagros (University Of Connecticut); Davis, Tracy (Connecticut Department of Children and Families)		Rozas, Lisa Werkmeister (University of Connecticut); Marrero-Johnson, Milagros (University of Connecticut); Davis, Tracy (Connecticut Department of Children and Families)	2	1		2.25	https://journals.iupui.edu/index.php/advancesinsocialwork/article/download/24973/24415	https://app.dimensions.ai/details/publication/pub.1152627268	44 Human Society; 4409 Social Work	4 Quality Education
119	1220	pub.1134302543	10.3390/socsci10010007			Simulation in Social Work: Creativity of Students and Faculty during COVID-19	Simulation learning plays an important role in social work education, allowing students to explore how theory and practice parameters can be integrated into actual situations they are likely to experience in the field. The arrival of COVID-19 and the sudden cessation of in-field practicum opportunities raised challenges for students to gain needed practice experience. Simulation offers an opportu…		No funding was received for this work.	Social Sciences				2021-01-03	2021	2021-01-03		10	1	7	All OA; Gold	Article	Tortorelli, Christina; Choate, Peter; Clayton, Marissa; El Jamal, Naya; Kaur, Sukhman; Schantz, Katherine	Tortorelli, Christina (Department of Child Studies and Social Work, Mount Royal University, Calgary, AB T3E 6K6, Canada); Choate, Peter (Department of Child Studies and Social Work, Mount Royal University, Calgary, AB T3E 6K6, Canada); Clayton, Marissa (Department of Child Studies and Social Work, Mount Royal University, Calgary, AB T3E 6K6, Canada); El Jamal, Naya (Department of Child Studies an…	Tortorelli, Christina (Mount Royal University)	Tortorelli, Christina (Mount Royal University); Choate, Peter (Mount Royal University); Clayton, Marissa (Mount Royal University); El Jamal, Naya (Mount Royal University); Kaur, Sukhman (Mount Royal University); Schantz, Katherine (Mount Royal University)	23	5		14.14	https://www.mdpi.com/2076-0760/10/1/7/pdf?version=1610423405	https://app.dimensions.ai/details/publication/pub.1134302543	44 Human Society; 4409 Social Work
120	1203	pub.1158349995	10.1002/ev.20534			Integrating theory and research on structural racism and social justice into evaluator preparation	Abstract This chapter discusses the relevance and role of structural racism and equity, critical race theory, and social justice perspectives in evaluation. We also suggest opportunities for formally educating the next generation of evaluators about ways to identify and address these topics in practice. One of the ways our field can remediate a long history of relegating the importance of these t…			New Directions for Evaluation				2023-03	2023	2023-05-25	2023-03	2023	177	49-55	All OA; Hybrid	Article	Villalobos, Jennifer; Bledsoe, Katrina L.; Donaldson, Stewart I.	Villalobos, Jennifer (Claremont Evaluation Center, Claremont Graduate University, Claremont, USA); Bledsoe, Katrina L. (Abt Associates, Rockville, Maryland, USA); Donaldson, Stewart I. (Claremont Evaluation Center, Claremont Graduate University, Claremont, USA)	Villalobos, Jennifer (Claremont Graduate University)	Villalobos, Jennifer (Claremont Graduate University); Bledsoe, Katrina L. (Lyondellbasell Advanced Polymers Inc); Donaldson, Stewart I. (Claremont Graduate University)	4	4		5.55	https://onlinelibrary.wiley.com/doi/pdfdirect/10.1002/ev.20534	https://app.dimensions.ai/details/publication/pub.1158349995	44 Human Society; 4404 Development Studies; 4409 Social Work	16 Peace, Justice and Strong Institutions
121	1193	pub.1166086469	10.1080/02615479.2023.2283044			Using life-history maps to support students in connecting theory to practice: a case study of a social work teaching intervention	Theory is essential to the professional knowledge base of social work, and the ability to understand, apply, and analyze theory in practice is central to professional capabilities and competence. This places social work education in the intersection of understanding, analyzing, and applying theoretical knowledge, a complex task which requires more than the transmission of information and extends …	Thank you to my teaching and learning mentor Dr Leanne Freeman who has encouraged and advised me on enhanced teaching practices and continued development as an educator. Ngā mihi nui ki a koe.		Social Work Education				2023-11-17	2023	2023-11-17	2024-12-20	43	9	2704-2717	All OA; Hybrid	Article	Pascoe, K. M.	Pascoe, K. M. (Social and Community Work, Department of Humanities, University of Otago, Dunedin, Aotearoa, New Zealand)	Pascoe, K. M. (University of Otago)	Pascoe, K. M. (University of Otago)	2	2		2.94	https://www.tandfonline.com/doi/pdf/10.1080/02615479.2023.2283044?needAccess=true	https://app.dimensions.ai/details/publication/pub.1166086469	39 Education; 3901 Curriculum and Pedagogy; 3903 Education Systems; 44 Human Society; 4409 Social Work	4 Quality Education
122	1187	pub.1027303305	10.1080/0261547042000224010			Drawing back the curtain: managing learning opportunities across two linguistic worlds, when the quality of interpretation is poor	We believe trans‐national social work education should be based on collaborative learning. Trans‐national educational projects are frequently dependent on communication using interpreters. Effective interpretation is crucial if an exchange of knowledge, values and skills is to occur within a learning situation. In a recent article, we explored some of the issues and dilemmas faced by social work …			Social Work Education				2004-06	2004		2004-06	23	3	253-264	All OA; Green	Article	Horwath, Jan; Shardlow, Steven M.	Horwath, Jan (); Shardlow, Steven M. ()	Shardlow, Steven M. ()	Horwath, Jan (); Shardlow, Steven M. ()	2	0		0.51	http://usir.salford.ac.uk/id/eprint/1115/	https://app.dimensions.ai/details/publication/pub.1027303305	44 Human Society; 4409 Social Work	4 Quality Education
123	1158	pub.1167243032	10.31265/jcsw.v18i2.675			Becoming a social worker: Personal and professional identity formation among social welfare officers in Ghana	Despite being the subject of numerous research, professional identity in social work remains an important yet contentious concept. The aim of this article is to contribute to the literature on professional identity in social work by reflecting on the mutual development of the personal and professional identities of social workers in Ghana. Interviews were conducted among 20 social workers in two …			Journal of Comparative Social Work				2023-12-21	2023	2023-12-21		18	2	180-206	All OA; Gold	Article	Salifu, Jovia	Salifu, Jovia ()		Salifu, Jovia ()	0	0		0	https://journals.uis.no/index.php/JCSW/article/download/675/412	https://app.dimensions.ai/details/publication/pub.1167243032	44 Human Society; 4409 Social Work
124	1148	pub.1072644883	10.5175/jswe.2005.200303110			STUDY ABROAD AND VALUES DEVELOPMENT IN SOCIAL WORK STUDENTS	This article presents results of a qualitative study of values development in U.S. and Scottish social work students who participated in a study-abroad program. Six themes emerged: opening the mind to new ways of thinking; awareness and insight into one's own values and beliefs; social awareness and challenges to societal values and beliefs; appreciation of difference, cultural sensitivity, and a…			Journal of Social Work Education				2005-01	2005	2013-03-16	2005-01	41	2	229-249	All OA; Green	Article	Lindsey, Elizabeth W.	Lindsey, Elizabeth W. (University of North Carolina at Greensboro)		Lindsey, Elizabeth W. (University of North Carolina at Greensboro)	109	8		27.47	http://libres.uncg.edu/ir/uncg/f/E_Lindsey_Study_2005.pdf	https://app.dimensions.ai/details/publication/pub.1072644883	44 Human Society; 4409 Social Work
125	1143	pub.1110826924	10.2478/njmr-2018-0028			Conceptualising Social Work Through the Lens of Transnationalism:	Professional social work was established and expanded in a historical moment marked by intense nation-building; it was organized along and in parallel with other welfare state services which functioned to strengthen the nation-state. Today social work is at practice in a society marked by intensified globalisation; social needs and social problems that social workers are confronted with in their …			Nordic Journal of Migration Research				2018-12-01	2018	2018-12-01	2018-12-01	8	4	245-253	All OA; Gold	Article	Righard, Erica	Righard, Erica (Department of Social Work and Malmö Institute for Studies of Migration, Diversity and Welfare (MIM), Malmö University, Malmö, Sweden)		Righard, Erica (Malmö University)	17	3		6.4	http://journal-njmr.org/articles/10.2478/njmr-2018-0028/galley/271/download/	https://app.dimensions.ai/details/publication/pub.1110826924	44 Human Society; 4409 Social Work
126	1139	pub.1083930795	10.1093/bjsw/bcx007			Editorial: A Snapshot of Social Work in the Asia–Pacific Region				The British Journal of Social Work				2017-01-01	2017	2017-02-23	2017-01-01	47	1	1-8	All OA; Bronze	Article	Shek, Daniel T.L.	Shek, Daniel T.L. ()	Shek, Daniel T.L. ()	Shek, Daniel T.L. ()	30	7		9.86	https://academic.oup.com/bjsw/article-pdf/47/1/1/10762536/bcx007.pdf	https://app.dimensions.ai/details/publication/pub.1083930795	44 Human Society; 4409 Social Work
127	1126	pub.1153394444	10.3390/su142316197			Exploring the Social Representations of Social Work in the Sri Lankan Cultural Context: A Qualitative Study	This preliminary study examines the social representations of social work relevant to the Sri Lankan cultural context while considering indigenous social work discourses. Under the conditions of the COVID-19 pandemic, six Sri Lankan social workers participated in online semistructured interviews. The interview data underwent thematic analysis, from which four main themes emerged: social work view…	The authors express their sincere gratitude to all the interviewees for sharing their experiences. Moreover, the authors thank the Sri Lanka Association of Professional Social Workers (SLAPSW) for supporting this study. The views expressed in this paper are those of the authors and do not necessarily reflect the views of the SLAPSW. Some content of this study, such as a brief outline, was present…	This work was supported by JSPS KAKENHI Grant Numbers JP21K13477, JP21KK0039 and JP22K02016.	Sustainability				2022-12-05	2022	2022-12-05		14	23	16197	All OA; Gold	Article	Higashida, Masateru; Ranaweera, Amarawansa; Herath, Chulani	Higashida, Masateru (Asian Research Institute for International Social Work, Shukutoku University, Chiba 260-8701, Japan); Ranaweera, Amarawansa (Sri Lanka Association of Professional Social Workers, Pannipitiya 10230, Sri Lanka); Herath, Chulani (Department of Psychology and Counselling, Faculty of Health Sciences, The Open University of Sri Lanka, Nugegoda 10250, Sri Lanka)	Higashida, Masateru (Shukutoku University)	Higashida, Masateru (Shukutoku University); Ranaweera, Amarawansa (Sri Lanka Association of Professional Social Workers, Pannipitiya 10230, Sri Lanka); Herath, Chulani (Open University of Sri Lanka)	4	1		4.51	https://www.mdpi.com/2071-1050/14/23/16197/pdf?version=1670558942	https://app.dimensions.ai/details/publication/pub.1153394444	44 Human Society; 4409 Social Work	4 Quality Education
128	1121	pub.1169862343	10.1093/bjsw/bcae023			Clown-based Social Work as Dissent in Child Protection Practice	Abstract This article presents Clown-Based Social Work (Steggall, 2023) as a form of dissent consistent with Paul Michael Garrett’s (2021a) conceptualisation of Dissenting Social Work. It contributes to the debate sparked by Chris Maylea (2020) and continued by Paul Michael Garrett (2021b) and Joe Whelan (2022). Clown-Based Social Work is an outcome of Steggall’s, doctoral research findings. Clow…			The British Journal of Social Work				2024-03-19	2024	2024-03-19	2024-07-01	54	5	2124-2141	All OA; Bronze	Article	Steggall, David; Scollen, Rebecca	Steggall, David (School of Psychology and Wellbeing, University of Southern Queensland, Darling Heights, QLD 4350, Australia); Scollen, Rebecca (School of Psychology and Wellbeing, University of Southern Queensland, Darling Heights, QLD 4350, Australia; School of Creative Arts, University of Southern Queensland, Darling Heights, QLD 4350, Australia)	Steggall, David (University of Southern Queensland)	Steggall, David (University of Southern Queensland); Scollen, Rebecca (University of Southern Queensland; University of Southern Queensland)	2	2			https://academic.oup.com/bjsw/advance-article-pdf/doi/10.1093/bjsw/bcae023/57018116/bcae023.pdf	https://app.dimensions.ai/details/publication/pub.1169862343	44 Human Society; 4409 Social Work
129	1119	pub.1002127606	10.1177/1468017316654606			The global social work definition: Ontology, implications and challenges	Summary The revised global definition for social work promotes the profession’s commitment to social change and development, social cohesion and the empowerment and liberation of people. By reviewing the implications of this definitional shift and locating this within existing influential social work ontological models, the implications for social work within global and national contexts are crit…	This article stems from an EU-funded research project: Civil Engagement in Social Work: Developing Global Models (NL_CIVIL; Grant Agreement Number: PIRSESGA-2012-318938).		Journal of Social Work				2016-06-12	2016	2016-06-12	2018-03	18	2	222-240	All OA; Green	Article	Ornellas, Abigail; Spolander, Gary; Engelbrecht, Lambert K	Ornellas, Abigail (Stellenbosch University, Stellenbosch, South Africa); Spolander, Gary (Coventry University, UK); Engelbrecht, Lambert K (Stellenbosch University, Stellenbosch, South Africa)	Ornellas, Abigail (Stellenbosch University)	Ornellas, Abigail (Stellenbosch University); Spolander, Gary (Coventry University); Engelbrecht, Lambert K (Stellenbosch University)	71	24		20.03	https://rgu-repository.worktribe.com/preview/1947710/ORNELLAS%202018%20The%20global%20social%20%28AAM%29.pdf	https://app.dimensions.ai/details/publication/pub.1002127606	44 Human Society; 4409 Social Work
130	1114	pub.1149029861	10.1080/23311886.2022.2093035			A concern for eco-social sustainability: Background, concept, values, and perspectives of eco-social work	Eco-social work is a new field of social work practice and research. The discussions about nature, ecology, environment, sustainable development, and indigenous eco-social knowledge gradually became a new direction for social work localization. Eco-social work emphasizes the intersubjectivity and the harmonious coexistence with nature, and the sustainability of welfare integration at the value le…	Senior Editor Dr. Sandro Serpa and two reviewers have made significant contributions to the revision of the paper.	Supported by the Office of Undergraduate Academic Affairs of Inner Mongolia University [20300-121051/019]; National Social Science Fund of China [16AMZ010]	Cogent Social Sciences				2022-06-28	2022	2022-06-28	2022-12-31	8	1	2093035	All OA; Gold	Article	Wang, Peng; Altanbulag, Altanbulag	Wang, Peng (School of Ethnology and Sociology, Inner Mongolia University, Hohhot, Inner Mongolia, China); Altanbulag, Altanbulag (School of Ethnology and Sociology, Inner Mongolia University, Hohhot, Inner Mongolia, China)	Wang, Peng (Inner Mongolia University)	Wang, Peng (Inner Mongolia University); Altanbulag, Altanbulag (Inner Mongolia University)	19	13		21.41	https://www.tandfonline.com/doi/pdf/10.1080/23311886.2022.2093035?needAccess=true	https://app.dimensions.ai/details/publication/pub.1149029861	44 Human Society; 4409 Social Work
131	1114	pub.1141595783	10.1080/02615479.2021.1972095			When racism, poverty, power and prestige collide in social work education and practice: a case study of a working class, Mixed-race female student studying at a prestigious White university in South Africa and employed in England as a social worker	The words, ‘Sorry, you’re not Black enough’ painfully alerted me to the domineering presence of institutional racism at the University of Cape Town (UCT), a prestigious university which customarily reserved access for White, affluent and international students. Positioned at the intersections of race, gender and social class, this study draws on Critical Race Theory’s counter-storytelling, using …		The author received no financial support for the research, authorship and/or publication of this article.	Social Work Education				2021-10-01	2021	2021-10-01	2023-04-03	42	3	353-370	All OA; Bronze	Article	Cornish, Carlene	Cornish, Carlene (School of Social Work, University of East Anglia, Norwich, UK)	Cornish, Carlene (University of East Anglia)	Cornish, Carlene (University of East Anglia)	4	4		2.46	https://www.tandfonline.com/doi/pdf/10.1080/02615479.2021.1972095?needAccess=true	https://app.dimensions.ai/details/publication/pub.1141595783	44 Human Society; 4409 Social Work	4 Quality Education
132	1113	pub.1141376776	10.18060/24064			We Are What We Read: Assessing Bias in the Implicit Curriculum of a Social Work Program	A school of social work devised a process to assess the implicit curriculum by auditing the required readings to identify the race and gender of the authors. As a profession, we espouse a strong commitment to social justice and diversity. Yet we know that there are limitations to our objectivity and that auditing is a valuable tool that can reveal biases. The concrete data provided by an audit ca…			Advances in Social Work				2021-09-23	2021	2021-09-23		21	2/3	841-856	All OA; Gold	Article	Tillotson, Emily; Smith, Susan; Current, Cheris Brewer	Tillotson, Emily (Walla Walla University); Smith, Susan (Walla Walla University); Current, Cheris Brewer (Walla Walla University)		Tillotson, Emily (Walla Walla University); Smith, Susan (Walla Walla University); Current, Cheris Brewer (Walla Walla University)	4	4		2.46	https://journals.iupui.edu/index.php/advancesinsocialwork/article/download/24064/23876	https://app.dimensions.ai/details/publication/pub.1141376776	44 Human Society; 4409 Social Work	16 Peace, Justice and Strong Institutions
133	1106	pub.1131629290	10.15270/56-4-880			TRANSFORMING SOCIAL WORK: CONTEXTUALISED SOCIAL WORK EDUCATION IN SOUTH AFRICA	Despite significant transformation efforts in South African social welfare, social work education still inducts students into prevailing paradigms. Critics suggest that dominant social work is ineffective in that it is culturally inappropriate, marginalises other knowledges, overlooks structural issues, is expensive and is mismatched to local needs. The term “contextualised social work education”…			Social Work/Maatskaplike Werk				2020-10	2020	2020-10		56	4	367	All OA; Gold	Article	Turton, Yasmin; Schmid, Jeanette	Turton, Yasmin (University of Johannesburg); Schmid, Jeanette (Vancover Island University)		Turton, Yasmin (University of Johannesburg); Schmid, Jeanette (Vancover Island University)	7	3		3.12	https://socialwork.journals.ac.za/pub/article/download/880/770	https://app.dimensions.ai/details/publication/pub.1131629290	44 Human Society; 4409 Social Work	4 Quality Education
134	1097	pub.1085632867	10.5296/ijsw.v4i1.11157			The Current Status of Social Work Science and Research: A Review of the Literature and Its Implications for Post-Soviet Countries	This paper offers a review of the major literature about the modern status of social work as a science within the American and European contexts and its implications for post-Soviet countries where social work is an emerging profession. It identifies the most appropriate types of social work research (e.g. translational research) that can be used for bridging the science and service communities t…			International Journal of Social Work				2017-05-23	2017	2017-05-23		4	1	22	All OA; Bronze	Article	Sadzaglishvili, Shorena	Sadzaglishvili, Shorena (Ilia State University, Georgia)		Sadzaglishvili, Shorena (Rutgers University-Newark)	1	0		0.33	https://www.macrothink.org/journal/index.php/ijsw/article/download/11157/9005	https://app.dimensions.ai/details/publication/pub.1085632867	44 Human Society; 4409 Social Work
135	1094	pub.1154936281	10.1177/00208728221081823			Reimagining Indigenised social work in Uganda: Voices of practitioners	Using thematic analysis, this study examined social workers’ (n = 21) descriptions of what Indigenised social work practice in Uganda entails. Responses from semi-structured interviews revealed the following three themes that inform social workers’ understanding of Indigenised social work practice: (1) collective action and mutuality, (2) communal welfare and respect for life and (3) liberation a…		Funding The author(s) disclosed receipt of the following financial support for the research, authorship and/or publication of this article: This project has received funding from the European Union’s Horizon 2020 research and innovation programme under the Marie Skłodowska-Curie grant agreement No 754285.	International Social Work				2022-03-12	2022	2022-03-12	2023-09	66	5	1396-1409	All OA; Hybrid	Article	Wamara, Charles Kiiza; Twikirize, Janestic; Bennich, Maria; Strandberg, Thomas	Wamara, Charles Kiiza (Örebro University, Sweden); Twikirize, Janestic (Makerere University, Uganda); Bennich, Maria (Örebro University, Sweden); Strandberg, Thomas (Örebro University, Sweden; Dalarna University, Sweden)	Wamara, Charles Kiiza (Örebro University)	Wamara, Charles Kiiza (Örebro University); Twikirize, Janestic (Makerere University); Bennich, Maria (Örebro University); Strandberg, Thomas (Örebro University; Dalarna University)	10	2		11.27	https://journals.sagepub.com/doi/pdf/10.1177/00208728221081823	https://app.dimensions.ai/details/publication/pub.1154936281	44 Human Society; 4409 Social Work
136	1093	pub.1168281606	10.4314/ajsw.v13i2.7			The place of indigenous knowledge in environmental social work in Zimbabwe	Environmentalism has gained momentum in social work. Practitioners and educators now acknowledge that leaving out environmental issues in their teaching curriculum and practice short charges their clients. This paper brings to the fore the element of indigenous knowledge in environmental social work practice. It explores how traditional beliefs and practices, Ubuntu philosophy, and mythology help…			African Journal of Social Work				2023-04-30	2023	2023-04-30		13	2	110-117	All OA; Gold	Article	Mukurazhizha, Rudo; Muridzo, Noel; Simbine, Samuel	Mukurazhizha, Rudo (); Muridzo, Noel (); Simbine, Samuel ()		Mukurazhizha, Rudo (); Muridzo, Noel (); Simbine, Samuel ()	6	6		10.48	https://www.ajol.info/index.php/ajsw/article/download/262526/247834	https://app.dimensions.ai/details/publication/pub.1168281606	44 Human Society; 4409 Social Work
137	1069	pub.1188304788	10.22329/csw.v25i2.8487			Mourning, Responsibility, and Social Work: A Call for Emotions in Knowledge Production	This paper seeks to explore the profound and rupturing impact that grief can have as a method to disrupt and analyze social works epistemological foundations. The paper first explores and identifies social works positivist roots and the limitations this has on creating liberatory and progressive inclusion practices. The essay then seeks to establish and identify the need for emotions within socia…			Critical Social Work				2024-11-21	2024	2024-11-21		25	2		All OA; Gold	Article	Ferkul, Sean	Ferkul, Sean ()		Ferkul, Sean ()	0	0			https://doi.org/10.22329/csw.v25i2.8487	https://app.dimensions.ai/details/publication/pub.1188304788	44 Human Society; 4409 Social Work
138	1066	pub.1105871581	10.5130/ccs.v10i2.6077			At Cross roads: White Social Work in Australia and the discourse on Australian multiculturalism	The profession of social work intervenes in the lives of the vulnerable and marginalised. In the majority, social work policy and practice in Australia has been founded on a western practice paradigm. Recent and rapid developments in the migratory trends of migrants and refugees places additional demands on social workers to practice with and for diverse communities. This article argues that the …			Cosmopolitan Civil Societies An Interdisciplinary Journal				2018-07-27	2018	2018-07-27		10	2	87-98	All OA; Gold	Article	Monani, Devaki	Monani, Devaki (Charles Darwin University)		Monani, Devaki (Charles Darwin University)	9	3		3.39	https://epress.lib.uts.edu.au/journals/index.php/mcs/article/download/6077/6464	https://app.dimensions.ai/details/publication/pub.1105871581	44 Human Society; 4409 Social Work
139	1066	pub.1101356048	10.1080/10437797.2016.1246268			Challenges Social Work Students Encounter in International Field Placements and Recommendations for Responsible Management	Social work students often face personal and institutional challenges prior to, during, and after international field placements. If not managed, these challenges may compromise students’ professional development and hinder their meaningful contribution to placements abroad, which is of particular concern when students from the Global North are placed in the Global South where uncontested ethnoce…			Journal of Social Work Education				2016-12-02	2016	2016-12-02	2017-01-02	53	1	18-36	All OA; Green	Article	Matthew, Lenore E.; Lough, Benjamin J.	Matthew, Lenore E. (); Lough, Benjamin J. ()	Matthew, Lenore E. ()	Matthew, Lenore E. (); Lough, Benjamin J. ()	23	2		6.49	https://figshare.com/articles/preprint/Challenges_Social_Work_Students_Encounter_in_International_Field_Placements_and_Recommendations_for_Responsible_Management/9198629	https://app.dimensions.ai/details/publication/pub.1101356048	44 Human Society; 4409 Social Work
140	1065	pub.1015697520	10.1606/1044-3894.3917			Toward a Culturally Competent Restorative Justice Practice Framework: A Focus on Asian Americans	This article suggests a culturally competent restorative justice practice framework for Asian Americans. In developing the framework, the historical development and contemporary issues of restorative justice in the West are explored, and the salient cultural traits and core elements of cultural competence with Asians and Asian Americans are examined. Tentative principles are advanced and recommen…			Families in Society				2009-10	2009	2018-05-03	2009-10	90	4	399-406	All OA; Bronze	Article	Choi, Jung Jin; Severson, Margaret	Choi, Jung Jin (School of Social Work, Florida Atlantic University.); Severson, Margaret (School of Social Welfare, University of Kansas.)	Choi, Jung Jin (Florida Atlantic University)	Choi, Jung Jin (Florida Atlantic University); Severson, Margaret (University of Kansas)	11	1		2.86	https://journals.sagepub.com/doi/pdf/10.1606/1044-3894.3917	https://app.dimensions.ai/details/publication/pub.1015697520	44 Human Society; 4409 Social Work	16 Peace, Justice and Strong Institutions
141	1065	pub.1086005889	10.1093/bjsw/bcx043			To Boldly Struggle where Once We Aspired to Go: Disability Today				The British Journal of Social Work				2017-04-01	2017	2017-06-10	2017-04-01	47	3	601-610	All OA; Bronze	Article	Golightley, Malcom; Holloway, Margaret	Golightley, Malcom (); Holloway, Margaret ()	Golightley, Malcom ()	Golightley, Malcom (); Holloway, Margaret ()	1	0		0.33	https://academic.oup.com/bjsw/article-pdf/47/3/601/23133487/bcx043.pdf	https://app.dimensions.ai/details/publication/pub.1086005889	44 Human Society; 4409 Social Work
142	1055	pub.1133460403	10.31265/jcsw.v15i2.314			Navigating the multifaceted landscape of culture and social work: A qualitative evidence synthesis of cultural competence and cultural sensitivity in practice	Faced with increased global migration, there is a growing concern that social workers need more training in- and knowledge of culture and ethnicity. These understandings have come to influence research, education, practice, codes of ethics and organizational policy, constituting a multicultural discourse within the field of social work. Social workers are expected to have cultural competence, and…			Journal of Comparative Social Work				2020-12-11	2020	2020-12-11		15	2	101-126	All OA; Gold	Article	Volckmar-Eeg, Maria Gussgard; Enoksen, Elisabeth	Volckmar-Eeg, Maria Gussgard (); Enoksen, Elisabeth ()		Volckmar-Eeg, Maria Gussgard (); Enoksen, Elisabeth ()	9	4		5.82	https://journals.uis.no/index.php/JCSW/article/download/314/273	https://app.dimensions.ai/details/publication/pub.1133460403	44 Human Society; 4409 Social Work; 47 Language, Communication and Culture; 4702 Cultural Studies	4 Quality Education
143	1053	pub.1168285017	10.4314/ajsw.v13i2.3			Directions in constructing a body of knowledge in eco-social work education and practice in Uganda: Actions, channels, and implications	In recent times, Uganda has witnessed human suffering resulting from the occurrence of environmental disasters thereby placing social work professionals, particularly those in civic organizations at the forefront of responses. As such, this article argues that the country’s largely agrarian welfare system and its pursuit of sustainable social development urgently necessitate reframing social work…			African Journal of Social Work				2023-04-30	2023	2023-04-30		13	2	70-77	All OA; Gold	Article	Bhangyi, Venesio Bwambale	Bhangyi, Venesio Bwambale ()		Bhangyi, Venesio Bwambale ()	1	1		1.75	https://www.ajol.info/index.php/ajsw/article/download/262507/247819	https://app.dimensions.ai/details/publication/pub.1168285017	44 Human Society; 4409 Social Work	4 Quality Education
144	1049	pub.1183285380	10.47577/teh.v10i.12122			Towards a process model of supervision in social work– a bibliometric analysis	Supervision plays a pivotal role in social work, ensuring ethical practices, professional growth, and the delivery of quality services. This study conducts a bibliometric analysis to explore the evolving conceptualizations and applications of supervision in social work. Using the Web of Science Core Collection, a search for studies with "supervision AND social work" in their titles yielded 246 wo…			Technium Education and Humanities				2024-12-10	2024	2024-12-10		10		99-114	All OA; Hybrid	Article	Vîșcu, Loredana-Ileana; Rad, Dana	Vîșcu, Loredana-Ileana (Faculty of Psychology, Tibiscus University of Timisoara, 300559 Timișoara, Romania); Rad, Dana (Center of Research Development and Innovation in Psychology, Faculty of Educational Sciences Psychology and Social Sciences, Aurel Vlaicu University of Arad, 310130 Arad, Romania)		Vîșcu, Loredana-Ileana (Tibiscus University of Timișoara); Rad, Dana (Aurel Vlaicu University of Arad)	6	6			https://techniumscience.com/index.php/education/article/download/12122/4668	https://app.dimensions.ai/details/publication/pub.1183285380	44 Human Society; 4409 Social Work
145	1042	pub.1059435060	10.1093/bjsw/bch309			Cultural Barriers to the Disclosure of Child Sexual Abuse in Asian Communities: Listening to What Women Say	There is apparent under-reporting of child sexual abuse in Britain’s Asian communities and a varied capacity amongst professionals to respond with cultural competence. Professional approaches originate in cultural contexts, which are often different from those of most British Asians. If the proportion of children and non-abusing carers from Asian communities who access relevant services is to inc…			The British Journal of Social Work				2005-11-18	2005	2005-11-18	2006-12-01	36	8	1361-1377	All OA; Bronze	Article	Gilligan, Philip; Akhtar, Shamim	Gilligan, Philip (Philip Gilligan (MA, BA, CQSW, PTA) is a lecturer in social work at the University of Bradford. He was, until August 2004, co-ordinator of FSU Bradford’s Alma Street Project for children and young people who have been sexually abused. His research interests include the evaluation of services for children and young people who have been sexually abused and the development of cultu…	Gilligan, Philip (Philip Gilligan (MA, BA, CQSW, PTA) is a lecturer in social work at the University of Bradford. He was, until August 2004, co-ordinator of FSU Bradford’s Alma Street Project for children and young people who have been sexually abused. His research interests include the evaluation of services for children and young people who have been sexually abused and the development of cultu…	Gilligan, Philip (Philip Gilligan (MA, BA, CQSW, PTA) is a lecturer in social work at the University of Bradford. He was, until August 2004, co-ordinator of FSU Bradford’s Alma Street Project for children and young people who have been sexually abused. His research interests include the evaluation of services for children and young people who have been sexually abused and the development of cultu…	125	13		31.5	https://academic.oup.com/bjsw/article-pdf/36/8/1361/4648920/bch309.pdf	https://app.dimensions.ai/details/publication/pub.1059435060	44 Human Society; 4409 Social Work
146	1023	pub.1030574605	10.1177/1049731512437557			Evaluating an Objective Structured Clinical Examination (OSCE) Adapted for Social Work	Objectives: To evaluate an objective structured clinical examination (OSCE) adapted for social work in a lab course and examine the degree to which it predicts competence in the practicum. Method: 125 Masters students participated in a one-scenario OSCE and wrote responses to standardized reflection questions. OSCE performance and reflections were rated on previously standardized scales, competen…	This research was generously supported by a grant from the Social Sciences and Humanities Research Council of Canada.		Research on Social Work Practice				2012-04-10	2012	2012-04-10	2012-07	22	4	428-436	All OA; Green	Article	Bogo, Marion; Regehr, Cheryl; Katz, Ellen; Logie, Carmen; Tufford, Lea; Litvack, Andrea	Bogo, Marion (Factor-Inwentash Faculty of Social Work, University of Toronto, Toronto, Ontario, Canada); Regehr, Cheryl (Factor-Inwentash Faculty of Social Work, University of Toronto, Toronto, Ontario, Canada; Office of the Vice-President and Provost, Academic Programs, University of Toronto, Toronto, Ontario, Canada); Katz, Ellen (Factor-Inwentash Faculty of Social Work, University of Toronto, …	Bogo, Marion (University of Toronto)	Bogo, Marion (University of Toronto); Regehr, Cheryl (University of Toronto; University of Toronto); Katz, Ellen (University of Toronto; Hincks-Dellcrest Centre, Toronto, Ontario, Canada); Logie, Carmen (University of Toronto; Women's College Hospital); Tufford, Lea (University of Toronto); Litvack, Andrea (University of Toronto)	88	12		23.9	https://utoronto.scholaris.ca/bitstreams/f1227fe8-dd24-4b2b-a695-eade10e8e4a2/download	https://app.dimensions.ai/details/publication/pub.1030574605	44 Human Society; 4409 Social Work
147	1011	pub.1141335835	10.18060/24465			Disrupting the Pedagogy of Hypocrisy: How Do We Move Beyond Teaching Students How to Survive White Supremacy?	This article discusses the ways that four educators experience the impacts of white supremacy in classroom spaces. We discuss the ways we navigate the tension created when we desire to foster antiracist spaces but are required to work within an academic system that is underpinned by white supremacy. Using tenets of Griot storytelling, we describe our points of origin, provide narrative examples o…			Advances in Social Work				2021-09-23	2021	2021-09-23		21	2/3	460-480	All OA; Gold	Article	Hipple, Erin; Reid, Lauren; Williams, Shanna; Gomez, Judelysse; Peyton, Clare; Wolcott, Jack	Hipple, Erin (West Chester University of Pennsylvania); Reid, Lauren (Arcadia University); Williams, Shanna (Widener University); Gomez, Judelysse (Connecticut College); Peyton, Clare (Connecticut College); Wolcott, Jack (West Chester University of Pennsylvania)		Hipple, Erin (West Chester University); Reid, Lauren (Arcadia University); Williams, Shanna (Widener University); Gomez, Judelysse (Connecticut College); Peyton, Clare (Connecticut College); Wolcott, Jack (West Chester University)	5	5		3.07	https://journals.iupui.edu/index.php/advancesinsocialwork/article/download/24465/23857	https://app.dimensions.ai/details/publication/pub.1141335835	44 Human Society; 4409 Social Work
148	1001	pub.1134779838	10.3390/su13031118			Options for Africa’s Child Welfare Systems from Nigeria’s Unsustainable Multicultural Models	The sustainability of Africa’s existing child welfare systems remains uncertain, potentially owing to the maltreatment of children amid the competing worldviews of the continent’s indigenous and non-indigenous practices and international childcare models. This article focuses on Nigeria’s unsustainable multicultural child welfare system in order to highlight the inherent challenges of child welfa…		This research received no external funding.	Sustainability				2021-01-21	2021	2021-01-21		13	3	1118	All OA; Gold	Article	Akintayo, Thomas	Akintayo, Thomas (Department of Social Sciences, Kuopio Campus, University of Eastern Finland, FIN-70211 Kuopio, Finland)		Akintayo, Thomas (University of Eastern Finland)	9	4		5.53	https://www.mdpi.com/2071-1050/13/3/1118/pdf?version=1612454564	https://app.dimensions.ai/details/publication/pub.1134779838	44 Human Society; 4409 Social Work
149	995	pub.1142233985	10.1016/j.jrurstud.2021.10.013			Social innovations in rural communities in Africa's Great Lakes region. A social work perspective	In Africa's Great Lakes region, many rural communities face serious challenges including chronic poverty, lack of infrastructure, high unemployment, inadequate education systems and healthcare services, as well as a fundamental absence of public social protection mechanisms. In some contexts, rural dwellers suffer from the additional burden of armed conflict and political violence. Yet, rural pop…		Austrian Partnership Programme in Higher Education and Research for Development (APPEAR); Grant ID 129.	Journal of Rural Studies				2023-04	2023		2023-04	99		262-271	All OA; Hybrid	Article	Spitzer, Helmut; Twikirize, Janestic	Spitzer, Helmut (Carinthia University of Applied Sciences, Austria); Twikirize, Janestic (Makerere University, Uganda)	Spitzer, Helmut (Carinthia University of Applied Sciences)	Spitzer, Helmut (Carinthia University of Applied Sciences); Twikirize, Janestic (Makerere University)	13	8		16.28	https://doi.org/10.1016/j.jrurstud.2021.10.013	https://app.dimensions.ai/details/publication/pub.1142233985	44 Human Society; 4404 Development Studies; 4409 Social Work; 4410 Sociology	1 No Poverty; 16 Peace, Justice and Strong Institutions; 9 Industry, Innovation and Infrastructure
150	988	pub.1165660076	10.1111/cfs.13100			Identifying key dimensions of indigenous led child welfare services: A qualitative literature review	Abstract National and state governments in settler colonial countries are increasingly committing to policies and practices aimed at strengthening Indigenous frameworks, programmes and leadership in child protection services. However, research‐based information on Indigenous child welfare services and programmes is sparse. This qualitative literature review explores and documents key features of …	ACKNOWLEDGEMENTS Open access publishing facilitated by The University of Auckland, as part of the Wiley ‐ The University of Auckland agreement via the Council of Australian University Librarians. CONFLICT OF INTEREST STATEMENT None declared.	Funding information This work was supported by an MBIE Endeavour Fund‐Smart Ideas Grant.	Child & Family Social Work				2023-11-06	2023	2023-11-06	2024-05	29	2	465-481	All OA; Hybrid	Article	Paki, Natalie Paki; King, Paula Toko; Lewis, Lashana; Walker, Shayne; Mackay, Hunia Te Urukaiata; Anderson, Daniel; Amante, Eunice; Kemp, Susan P.	Paki, Natalie Paki (University of Auckland, Auckland, New Zealand); King, Paula Toko (Te Rōpū Rangahau Hauora a Eru Pōmare, University of Otago, Wellington, New Zealand); Lewis, Lashana (Te Hou Ora Whānau Services, Dunedin, New Zealand); Walker, Shayne (University of Otago, Dunedin, New Zealand); Mackay, Hunia Te Urukaiata (VOYCE–Whakarongo Mai, Auckland, New Zealand); Anderson, Daniel (Te Hou Or…	Kemp, Susan P. (University of Auckland)	Paki, Natalie Paki (University of Auckland); King, Paula Toko (University of Otago); Lewis, Lashana (Te Hou Ora Whānau Services, Dunedin, New Zealand); Walker, Shayne (University of Otago); Mackay, Hunia Te Urukaiata (VOYCE–Whakarongo Mai, Auckland, New Zealand); Anderson, Daniel (Te Hou Ora Whānau Services, Dunedin, New Zealand); Amante, Eunice (VOYCE–Whakarongo Mai, Auckland, New Zealand); Kemp…	4	4		6.98	https://onlinelibrary.wiley.com/doi/pdf/10.1111/cfs.13100	https://app.dimensions.ai/details/publication/pub.1165660076	44 Human Society; 4409 Social Work
151	984	pub.1182648457	10.1093/bjsw/bcae184			Social work and social development in Nepal: Coloniality and a way out	Abstract In this article, we explore the epistemological and practical dimensions of coloniality within social work and social development in Nepal. The study addresses the foundational aspects of these fields, examining their relationship with local communities and cultures. While Nepal has never been formally colonized, persistent colonial continuums are argued to exist within social work and s…	We thank the research participants for sharing their valuable and in-depth insights into their experiences in Nepali social work. Conflicts of interest. None declared.	This study has been funded by the Finnish Cultural Foundation (Decision numbers: 00200735 and 00210728).	The British Journal of Social Work				2024-11-23	2024	2024-11-23	2025-04-01	55	3	1215-1235	All OA; Hybrid	Article	Mikkonen, Enni; Yadav, Raj	Mikkonen, Enni (Faculty of Social Sciences, University of Lapland, P.O. Box 122, Rovaniemi, FI-96101, Finland); Yadav, Raj (School of Law and Society, University of the Sunshine Coast, 90 Sippy Downs Dr, Queensland, 4556, Australia)	Mikkonen, Enni (University of Lapland)	Mikkonen, Enni (University of Lapland); Yadav, Raj (University of the Sunshine Coast)	0	0			https://academic.oup.com/bjsw/advance-article-pdf/doi/10.1093/bjsw/bcae184/60797139/bcae184.pdf	https://app.dimensions.ai/details/publication/pub.1182648457	44 Human Society; 4404 Development Studies; 4409 Social Work
152	975	pub.1147360182	10.1111/ijsw.12536			Social workers' recommendations regarding child custody of parents with intellectual developmental disabilities or mental illness	Abstract This article examines Muslim social workers' recommendations regarding child custody of parents with intellectual developmental disabilities and mental illness in Israel. Aside from the professional challenges of determining whether the parents are capable of being custodians, the article portrays and discusses the role of traditional norms in Muslim social workers' recommendations. The …	ACKNOWLEDGMENTS We thank the management of the Shari&#x27;a courts for approving the review of the cases. CONFLICT OF INTEREST We declared no potential conflicts of interest with respect to the research, authorship, and/or publication of this article.	Funding information This work was funded by The Shalem Fund under grant (number 890‐175‐2019)	International Journal of Social Welfare				2022-04-25	2022	2022-04-25	2022-10	31	4	463-475	All OA; Hybrid	Article	Leena, Badran; Arie, Rimmerman	Leena, Badran (School of Social Work, University of Haifa, Haifa, Israel; School of Social Welfare, University of California, Berkeley, California, USA); Arie, Rimmerman (Richard Crossman Professor of Social Welfare and Social Planning, School of Social Work, University of Haifa, Haifa, Israel)	Leena, Badran (University of Haifa; University of California, Berkeley)	Leena, Badran (University of Haifa; University of California, Berkeley); Arie, Rimmerman (University of Haifa)	2	1		2.25	https://onlinelibrary.wiley.com/doi/pdfdirect/10.1111/ijsw.12536	https://app.dimensions.ai/details/publication/pub.1147360182	44 Human Society; 4409 Social Work	3 Good Health and Well Being
153	963	pub.1059436765	10.1093/bjsw/bcw007			Pondering the Colour of Empathy: Social Work Students’ Reasoning on Activism, Empathy and Racism	Australia is a multicultural society. However, its history of British colonisation has contributed to enduring overt and covert discrimination, racism and black/white racial divisions. Aboriginal and Torres Strait Islander peoples are the recipients of ongoing racial discrimination, they are the most disadvantage groups in Australia and they are significantly overrepresented as social work client…	I gratefully acknowledge the contribution of undergraduate social work students in advancing the research activity and theorising detailed in this publication.		The British Journal of Social Work				2016-03-12	2016	2016-03-12	2017-01-01	47	1	162-180	All OA; Bronze	Article	Gair, Susan	Gair, Susan ()	Gair, Susan ()	Gair, Susan ()	20	7		5.64	https://academic.oup.com/bjsw/article-pdf/47/1/162/10762497/bcw007.pdf	https://app.dimensions.ai/details/publication/pub.1059436765	44 Human Society; 4409 Social Work	16 Peace, Justice and Strong Institutions
154	949	pub.1128044973	10.1108/jhass-12-2019-0082			Applying anti-oppressive approach to social work practice in Africa: reflections of Nigerian BSW students	Purpose As the next generation of social workers in a continent bedecked by oppressive customs, it is cardinal that the voices of social work students be heard. This study aims to share the reflections of Nigerian BSW students about anti-oppressive approach to professional practice. Design/methodology/approach Drawing on a qualitative approach, semi-structured interviews were conducted among four…			Journal of Humanities and Applied Social Sciences				2020-08-19	2020		2020-08-19	2	3	197-213	All OA; Gold	Article	Amadasun, Solomon; Omorogiuwa, Tracy Beauty Evbayiro	Amadasun, Solomon (Department of Social Work, Faculty of Social Sciences, University of Benin, Benin City, Nigeria); Omorogiuwa, Tracy Beauty Evbayiro (Department of Social Work, Faculty of Social Sciences, University of Benin, Benin City, Nigeria)	Amadasun, Solomon (University of Benin)	Amadasun, Solomon (University of Benin); Omorogiuwa, Tracy Beauty Evbayiro (University of Benin)	9	4		4.01	https://www.emerald.com/insight/content/doi/10.1108/JHASS-12-2019-0082/full/pdf?title=applying-anti-oppressive-approach-to-social-work-practice-in-africa-reflections-of-nigerian-bsw-students	https://app.dimensions.ai/details/publication/pub.1128044973	44 Human Society; 4409 Social Work	4 Quality Education
155	941	pub.1160220124	10.3126/mef.v13i01.56022			Virtual International Group Study Program: Towards Understanding Sustainable Development Goals and Community Development in Nepal	To fill the gaps in international education left by the COVID-19 pandemic, many study abroad educators have become creative with their international programming by going online. This theoretical paper describes the conceptualization and delivery of a virtual collaborative program that was developed through a partnership between the Faculty of Social Work professors at the University of Calgary in…			Molung Educational Frontier				2023-06-28	2023	2023-06-28				23-46	All OA; Gold	Article	Walsh, Christine A.; Curties, Hana; Dhungel, Rita	Walsh, Christine A. (University of Calgary, Canada); Curties, Hana (University of Calgary, Canada); Dhungel, Rita (University of Calgary, Canada)		Walsh, Christine A. (University of Calgary); Curties, Hana (University of Calgary); Dhungel, Rita (University of Calgary)	3	3		5.24	https://www.nepjol.info/index.php/mef/article/download/56022/41879	https://app.dimensions.ai/details/publication/pub.1160220124	44 Human Society; 4409 Social Work	4 Quality Education
156	938	pub.1157619298	10.1177/14733250231173522			Challenging perspectives: Reflexivity as a critical approach to qualitative social work research	Reflexivity is acknowledged as a crucial concept and is pivotal in the methodology of qualitative research. Various practices of reflexivity are adopted in the social science disciplines. However, the concept is difficult to pin down and the challenge for researchers is to address how to become reflexive and do reflexivity in research practice. In social work, reflexivity has further been develop…		FundingThe author(s) received no financial support for the research, authorship, and/or publication of this article.	Qualitative Social Work				2023-04-28	2023	2023-04-28	2024-07	23	4	725-740	All OA; Hybrid	Article	Ide, Yayoi; Beddoe, Liz	Ide, Yayoi (Faculty of Education and Social Work, University of Auckland, Auckland, New Zealand); Beddoe, Liz (School of Counselling, Human Services and Social Work, The University of Auckland, Auckland, New Zealand)	Ide, Yayoi (University of Auckland)	Ide, Yayoi (University of Auckland); Beddoe, Liz (University of Auckland)	43	38		75.09	https://journals.sagepub.com/doi/pdf/10.1177/14733250231173522	https://app.dimensions.ai/details/publication/pub.1157619298	44 Human Society; 4409 Social Work
157	934	pub.1172910991	10.1007/s44282-024-00058-4			Re-examining international social work theory: “Where do we come from? What are we? Where are we going?”	The purpose of this exploratory study is to present a discussion on new developmental perspectives for international social work (ISW) theory. In order to examine the various aspects of this theory, the author first discusses different theoretical social work frameworks. Since some aspects cannot be discussed according to these frameworks, three main perspectives are applied to examine these ISW …	A portion of this study was orally presented by the author at the 8th ARIISW-Shukutoku University International Academic Forum, titled “International Social Work Beyond the Centennial Anniversary of Social Work: A Theory Debate (Disappearance or Expansion; Reform or New Construction),” held on February 27, 2024. The proceedings, including a transcript of the author’s oral presentation, would be p…	This study was supported by JSPS KAKENHI Grant Nos. JP23H00900, JP24K16556.	Discover Global Society				2024-06-15	2024	2024-06-15		2	1	31	All OA; Gold	Article	Higashida, Masateru	Higashida, Masateru (Asian Research Institute for International Social Work, Shukutoku University, Chiba, Japan)	Higashida, Masateru (Shukutoku University)	Higashida, Masateru (Shukutoku University)	3	3			https://link.springer.com/content/pdf/10.1007/s44282-024-00058-4.pdf	https://app.dimensions.ai/details/publication/pub.1172910991	44 Human Society; 4409 Social Work
158	931	pub.1190588196	10.31265/jcsw.v20i1.744			The Role of Social Work in Empowering People Living with HIV (PLHIV) for Poverty Alleviation in the Huye District in Rwanda: Indigenisation and the Role of Intermediary Social Work Actors	People in need (PIN), such as people living with HIV/AIDS (PLHIV), are often discriminated against, isolated and disempowered. Consequently, it is not always easy for them to fight for their survival. However, the literature has shown that once empowered, PLHIV manage to cope with social problems, particularly poverty and its ramifications. This study aimed to examine and show how social work, as…			Journal of Comparative Social Work				2025-07-08	2025	2025-07-08		20	1	167-191	All OA; Gold	Article	Kalinganire, Charles	Kalinganire, Charles ()		Kalinganire, Charles ()	0	0			https://journals.uis.no/index.php/JCSW/article/download/744/481	https://app.dimensions.ai/details/publication/pub.1190588196	44 Human Society; 4409 Social Work	1 No Poverty
159	925	pub.1134676884	10.5209/cuts.67852			Challenges for Social Work Education in a Changing Europe	There can be little doubt that neoliberalism has replaced social democracy as the political consensus across Europe and globally. This has led to levels of inequality and relative poverty unprecedented since the post-war social democratic consensus. It has also led to a common sense, neoliberal narrative essential in garnering support for policies that weaken workers’ rights, deregulate corporati…			Cuadernos de Trabajo Social				2020-11-27	2020	2020-11-27		34	1	19-30	All OA; Gold	Article	Fenton, Jane	Fenton, Jane ()		Fenton, Jane ()	0	0		0	https://revistas.ucm.es/index.php/CUTS/article/download/67852/4564456555498	https://app.dimensions.ai/details/publication/pub.1134676884	44 Human Society; 4409 Social Work	4 Quality Education
160	923	pub.1183972464	10.20525/ijrbs.v13i10.3789			Conflict resolution in indigenous communities: A social work perspective	Indigenous communities possess rich traditions of conflict resolution rooted in their cultural values, collective decision-making, and community involvement. However, the imposition of Western legal frameworks and colonial histories has often disrupted these practices, leading to increased tensions and unresolved conflicts. This study explored conflict resolution within Indigenous communities, em…			International Journal of Research In Business and Social Science				2024-12-30	2024	2024-12-30		13	10	68-77	All OA; Gold	Article	Alpha, Rakgwata Phoke; Tumelo, Sekgobela	Alpha, Rakgwata Phoke (University of venda); Tumelo, Sekgobela ()		Alpha, Rakgwata Phoke (University of Venda); Tumelo, Sekgobela ()	0	0			https://doi.org/10.20525/ijrbs.v13i10.3789	https://app.dimensions.ai/details/publication/pub.1183972464	44 Human Society; 4409 Social Work	16 Peace, Justice and Strong Institutions
161	918	pub.1148667157	10.18060/25255			"The Problem is That Puerto Rico Does Not Have a Say": Students' Critical Reflections on Service-Learning in Post-Maria Puerto Rico	This study explored the reflections of graduate social work students from a public university in the Midwest region of the continental United States, following a service-learning course in San Juan, Puerto Rico during the aftermath of Hurricane Maria. The course linked academic study and civic engagement through organized service with Proyecto ENLACE, a public corporation that unites eight commun…			Advances in Social Work				2022-06-14	2022	2022-06-14		22	1	197-218	All OA; Gold	Article	Sherwood, Dee Ann; VanDeusen, Karen; Diaconu, Mioara; Jones, Courtney	Sherwood, Dee Ann (Western Michigan University); VanDeusen, Karen (Western Michigan University); Diaconu, Mioara (Western Michigan University); Jones, Courtney (Western Michigan University)		Sherwood, Dee Ann (Western Michigan University); VanDeusen, Karen (Western Michigan University); Diaconu, Mioara (Western Michigan University); Jones, Courtney (Western Michigan University)	1	1		1.13	https://journals.iupui.edu/index.php/advancesinsocialwork/article/download/25255/24302	https://app.dimensions.ai/details/publication/pub.1148667157	44 Human Society; 4409 Social Work	11 Sustainable Cities and Communities
162	912	pub.1141201120	10.1177/00208728211041669			Indigenization and authentization of epistemology in China’s social work: Moving beyond Confucianism, Taoism, and Chinese Buddhism	How China’s social work can establish its own epistemology has remained largely unexplored. This article focuses on Confucianism, Taoism, and Chinese Buddhism to start this epistemological exploration, as they represent Chinese culture and can provide valuable epistemological elements for China’s social work. Moving beyond epistemological elements from these philosophies, how social workers in Ch…		Funding The authors received no financial support for the research, authorship, and/or publication of this article.	International Social Work				2021-09-17	2021	2021-09-17	2023-07	66	4	1005-1017	All OA; Hybrid	Article	Zhao, Kedi; Tan, Weijia; Tsang, A Ka Tat	Zhao, Kedi (University of Toronto, Canada); Tan, Weijia (University of Toronto, Canada); Tsang, A Ka Tat (University of Toronto, Canada)	Zhao, Kedi (University of Toronto)	Zhao, Kedi (University of Toronto); Tan, Weijia (University of Toronto); Tsang, A Ka Tat (University of Toronto)	9	7		5.53	https://journals.sagepub.com/doi/pdf/10.1177/00208728211041669	https://app.dimensions.ai/details/publication/pub.1141201120	44 Human Society; 4409 Social Work
163	907	pub.1148667163	10.18060/25617			Pedagogical Strategies for Teaching the DSM: Centering Diversity and Equity	The Diagnostic and Statistical Manual of Mental Disorders, Fifth Edition presents numerous ethical challenges for social workers. As social work educators, we are tasked with preparing students for clinical social work practice, which includes not only instructing students in the use of the DSM-5, but also emphasizing the importance of pursuing social justice and equity in clinical work. With the…			Advances in Social Work				2022-06-14	2022	2022-06-14		22	1	133-144	All OA; Gold	Article	Levine, Amy; Ghezzi, Mariyln	Levine, Amy (University of North Carolina at Chapel Hill); Ghezzi, Mariyln (University of North Carolina at Chapel Hill)		Levine, Amy (University of North Carolina at Chapel Hill); Ghezzi, Mariyln (University of North Carolina at Chapel Hill)	1	0		1.13	https://journals.iupui.edu/index.php/advancesinsocialwork/article/download/25617/24297	https://app.dimensions.ai/details/publication/pub.1148667163	44 Human Society; 4409 Social Work
164	901	pub.1155195695	10.1080/02615479.2023.2168638			Understanding Ubuntu and its contribution to social work education in Africa and other regions of the world	The overarching philosophy of Black people of Africa is known by different names but Ubuntu is the most popular name. Ubuntu’s origin is attributable to Black Africans in all regions of the continent—North, West, Central, East and South. Different communities may emphasize its different aspects but they are common knowledges, values and practices. The article begins with a discussion of the philo…			Social Work Education				2023-02-06	2023	2023-02-06	2024-05-18	43	4	1123-1139	All OA; Hybrid	Article	Mugumbate, Jacob Rugare; Mupedziswa, Rodreck; Twikirize, Janestic M.; Mthethwa, Edmos; Desta, Ajanaw Alemie; Oyinlola, Oluwagbemiga	Mugumbate, Jacob Rugare (School of Health and Society, University of Wollongong, Wollongong, New South Wales, Australia; Senior Research Associate, Department of Social Work & Community Development, University of Johannesburg, Johannesburg, South Africa); Mupedziswa, Rodreck (Department of Social Work, University of Botswana, Gaborone, Botswana); Twikirize, Janestic M. (Department of Social Work,…	Mugumbate, Jacob Rugare (University of Wollongong; University of Johannesburg)	Mugumbate, Jacob Rugare (University of Wollongong; University of Johannesburg); Mupedziswa, Rodreck (University of Botswana); Twikirize, Janestic M. (Makerere University); Mthethwa, Edmos (University of Zimbabwe); Desta, Ajanaw Alemie (University of Gondar); Oyinlola, Oluwagbemiga (University College Hospital, Ibadan; McGill University)	32	30		55.88	https://doi.org/10.1080/02615479.2023.2168638	https://app.dimensions.ai/details/publication/pub.1155195695	44 Human Society; 4409 Social Work	4 Quality Education
165	895	pub.1085933437	10.1016/j.childyouth.2017.06.021			The treatment needs of victims/survivors of child sexual abuse (CSA) from ethnic minority communities: A literature review and suggestions for practice	One significant finding from an exhaustive literature review on child sexual abuse (CSA) and ethnic minority communities is that victims appear to be at higher risk for suicidality. This may be due to the many barriers to professional help-seeking in this group, most commonly associated with protecting the family's name. This makes their treatment needs particularly critical, after the barriers h…	AcknowledgmentsWe would like to thank Professor Fiona Arney, Professor Leah Bromfield, Dr. Jen Hamer, and Professor Patrick O&#x27;Leary for their comments and feedback on an earlier version. We would also like to thank the anonymous reviewers of this article for their comments and feedback, which have been incorporated into the manuscript.		Children and Youth Services Review				2017-08	2017		2017-08	79		166-179	All OA; Green	Article	Sawrikar, Pooja; Katz, Ilan	Sawrikar, Pooja (School of Human Services and Social Work (HSV), Griffith University (GU), Gold Coast campus, Parklands Drive, Southport, Queensland 4222, Australia); Katz, Ilan (Social Policy Research Centre (SPRC), University of New South Wales (UNSW), Australia)	Sawrikar, Pooja (Griffith University)	Sawrikar, Pooja (Griffith University); Katz, Ilan (UNSW Sydney)	46	14		15.28	http://hdl.handle.net/10072/347855	https://app.dimensions.ai/details/publication/pub.1085933437	44 Human Society; 4409 Social Work; 4410 Sociology	16 Peace, Justice and Strong Institutions
166	892	pub.1152821065	10.1111/ijsw.12571			Imagining the ecosocial within social work	Abstract Aiming to explore how the ecosocial is imagined within social work research, this article engages with understandings of the relationship between the social and ecological realms when responding to the call for sustainability. A theoretical framework offering five possible imaginations of the ecosocial was developed: the holistic; the anthropocentric conflictual; the anthropocentric comp…	ACKNOWLEDGEMENT We thank Erin Kennedy Tsunoda for conducting the first part of the search in databases in 2020 that we could update in 2021 and expand from. We also want to thank the reviewers for valuable comments. CONFLICT OF INTEREST The authors declare no potential conflict of interests.		International Journal of Social Welfare				2022-11-16	2022	2022-11-16	2023-10	32	4	455-472	All OA; Hybrid	Article	Thysell, Maria; Cuadra, Carin Björngren	Thysell, Maria (Institute for Sustainable Urban Development, Malmö University, Malmö, Sweden); Cuadra, Carin Björngren (Institute for Sustainable Urban Development, Malmö University, Malmö, Sweden; Department of Social Work, Malmö University, Malmö, Sweden)	Cuadra, Carin Björngren (Malmö University; Malmö University)	Thysell, Maria (Malmö University); Cuadra, Carin Björngren (Malmö University; Malmö University)	13	13		14.65	https://onlinelibrary.wiley.com/doi/pdfdirect/10.1111/ijsw.12571	https://app.dimensions.ai/details/publication/pub.1152821065	44 Human Society; 4409 Social Work
167	890	pub.1136392510	10.30827/tsg-gsw.v3i5.1522			Professional 'imperialism' and resistance: Social Work in the Filippines	The sociology of professions has traditionally attempted to increase our understanding of categorisations of different occupations by reference to taxonomic hierarchies, as well as the identification and exploration of characteristics that warrant 'professional status'. In may cases, this explorations take the forms of historical accounts of professional activity. Rarely, however, has the literat…			Trabajo Social Global-Global Social Work				2013-12-26	2013	2013-12-26		3	5	28-53	All OA; Gold	Article	Price, Jem; Artaraz, Kepa	Price, Jem (University of Brighton (United Kingdom)); Artaraz, Kepa (University of Brighton (United Kingdom))		Price, Jem (University of Brighton); Artaraz, Kepa (University of Brighton)	9	2		2.36	https://doi.org/10.30827/tsg-gsw.v3i5.1522	https://app.dimensions.ai/details/publication/pub.1136392510	44 Human Society; 4409 Social Work	4 Quality Education
168	883	pub.1141335817	10.18060/24120			De-Centering Whiteness Through Revisualizing Theory in Social Work Education, Practice, and Scholarship	Institutions that frame social work education and prepare future practitioners are firmly rooted in hegemonic philosophies and practices that perpetuate colonization, oppression, and white supremacy. In recognizing that white supremacy is a mechanism of social control, that our current social structure is grounded in liberal-patriarchal capitalism, and that social work conforms to prevailing soci…			Advances in Social Work				2021-09-23	2021	2021-09-23		21	2/3	654-671	All OA; Gold	Article	Crudup, Chandra; Fike, Chris; McLoone, Claire	Crudup, Chandra (Arizona State University); Fike, Chris (Saginaw Valley State University); McLoone, Claire (Arizona State University)		Crudup, Chandra (Arizona State University); Fike, Chris (Saginaw Valley State University); McLoone, Claire (Arizona State University)	15	5		9.22	https://journals.iupui.edu/index.php/advancesinsocialwork/article/download/24120/23866	https://app.dimensions.ai/details/publication/pub.1141335817	44 Human Society; 4409 Social Work	4 Quality Education
169	881	pub.1072645046	10.5175/jswe.2009.200800083			PRINCIPLES OF EFFECTIVE PRACTICE IN INTERNATIONAL SOCIAL WORK FIELD PLACEMENTS	This article explores the conditions under which international social work field placements may be effectively administered. The positive and negative potential of international placements is examined. A review of empirical and theoretical literature in the related fields of service learning and international volunteering reveals that role taking, reflection, intensity, support, and reciprocity a…			Journal of Social Work Education				2009-09	2009	2013-03-16	2009-09	45	3	467-480	All OA; Green	Article	Lough, Benjamin J.	Lough, Benjamin J. (Washington University in St. Louis)		Lough, Benjamin J. (Washington University in St. Louis)	50	3		12.99	https://figshare.com/articles/preprint/Principles_of_Effective_Practice_in_International_Social_Work_Field_Placements/9198824	https://app.dimensions.ai/details/publication/pub.1072645046	44 Human Society; 4409 Social Work
170	879	pub.1053384746	10.1080/13691457.2014.948810			Making space for embedded knowledge in Global Mental Health: a role for social work?	The ‘Global Mental Health’ (GMH) movement, an influential driver of transnational knowledge transfer in the field of mental health, advocates evidence-based strategies to ‘scale up’ services in low- and middle-income countries. As with debates on global and local frameworks for social work, there are concerns about marginalisation of knowledge that does not neatly fit the GMH discourse. This arti…	We are grateful to the participants at the ‘Social Work without Borders’ conference (University of Lincoln, January 2014) and to colleagues in the University of Edinburgh Social Work subject area for feedback on earlier versions of this article. We also thank the anonymous reviewers for their perceptive comments.		European Journal of Social Work				2014-08-18	2014	2014-08-18	2015-08-08	18	4	569-582	All OA; Green	Article	Orr, David; Jain, Sumeet	Orr, David (Department of Social Work and Social Care, University of Sussex, Brighton, UK); Jain, Sumeet (Social Work, School of Social and Political Science, University of Edinburgh, Edinburgh, UK)	Orr, David (University of Sussex)	Orr, David (University of Sussex); Jain, Sumeet (University of Edinburgh)	14	1		3.79	https://sussex.figshare.com/articles/journal_contribution/Making_space_for_embedded_knowledge_in_global_mental_health_a_role_for_social_work/23409464/1/files/41132657.pdf	https://app.dimensions.ai/details/publication/pub.1053384746	44 Human Society; 4409 Social Work	3 Good Health and Well Being
171	873	pub.1128967130	10.46303/jcve.2020.6			Intercultural Experiences Prior to the Educational Program: Occupational Therapy and Social Work Students	In the health and social professions, including occupational therapy and social work, interactions and exchanges with people are essential. Populations encountered by professionals in these fields are becoming increasingly diverse in terms of age, origin, language, health status, and socio-economic background. Sometimes, professionals can have potential misinterpretations regarding intentions and…			Journal of Culture and Values in Education				2020-07-01	2020	2020-07-01		4	1	15-33	All OA; Gold	Article	Tétreault, Sylvie; Bétrisey, Carine; Brisset, Camille; Gulfi, Alida; Schaer, Martine; Leanza, Yvan; Kühne, Nicolas	Tétreault, Sylvie (HES-SO | Haute école de travail social et de la santé | EESP | Lausanne); Bétrisey, Carine (HES-SO | Haute école de travail social et de la santé | EESP | Lausanne); Brisset, Camille (Université de Bordeaux, Laboratoire de Psychologie EA 4139); Gulfi, Alida (HES-SO | Haute école de travail social Fribourg | HETS-FR | Fribourg); Schaer, Martine (HES-SO | Haute école de travail s…		Tétreault, Sylvie (HES-SO | Haute école de travail social et de la santé | EESP | Lausanne); Bétrisey, Carine (HES-SO | Haute école de travail social et de la santé | EESP | Lausanne); Brisset, Camille (University of Bordeaux); Gulfi, Alida (HES-SO | Haute école de travail social Fribourg | HETS-FR | Fribourg); Schaer, Martine (HES-SO | Haute école de travail social et de la santé | EESP | Lausan…	6	3		2.67	https://cultureandvalues.org/index.php/JCV/article/download/42/46	https://app.dimensions.ai/details/publication/pub.1128967130	42 Health Sciences; 44 Human Society; 4409 Social Work	4 Quality Education
172	860	pub.1183038660	10.3390/socsci13120648			Examining the Role of Generative AI in Enhancing Social Work Education: An Analysis of Curriculum and Assessment Design	Generative Artificial Intelligence (GAI) holds significant potential to advance the field of social work, yet it brings forth considerable challenges and risks. Key concerns include the legal and ethical ramifications of GAI application, as well as its effects on the vital human connections inherent in social work. Nonetheless, educators in this field must ready their students for the evolving di…		This research received no external funding.	Social Sciences				2024-11-29	2024	2024-11-29		13	12	648	All OA; Gold	Article	Reimer, Elizabeth Claire	Reimer, Elizabeth Claire (Social Work, Faculty of Health, Southern Cross University, East Lismore, NSW 2480, Australia)		Reimer, Elizabeth Claire (Southern Cross University)	3	3			https://doi.org/10.3390/socsci13120648	https://app.dimensions.ai/details/publication/pub.1183038660	44 Human Society; 4409 Social Work	4 Quality Education
173	858	pub.1121797384	10.15270/55-4-764			WE CAN’T BE HERE FOREVER”: UNIVERSITY STUDENTS’ REFLECTIONS ON TERMINATING COMMUNITY-ENGAGEMENT RELATIONSHIPS	Studies on community engagement (CE) focus on its benefits but not enough on termination and difficulties experienced at the personal level with exiting projects. A study on CE with service-learning students and volunteers at a South African university identified issues and themes pertaining to termination as systematic process, emotional responses to termination, and the need to find closure. Th…			Social Work/Maatskaplike Werk				2019-10	2019	2019-10		55	4	468	All OA; Gold	Article	Fluks, Lorenza; Naidoo, Anthony	Fluks, Lorenza (Human Sciences Research Council); Naidoo, Anthony (University Stellenbosch)		Fluks, Lorenza (Human Sciences Research Council); Naidoo, Anthony (Stellenbosch University)	2	0		0.88	https://socialwork.journals.ac.za/pub/article/download/764/690	https://app.dimensions.ai/details/publication/pub.1121797384	44 Human Society; 4409 Social Work
174	842	pub.1141335843	10.18060/24484			Abolishing Whiteness: Preparing MSW Social Work Students for Anti-Racist Practice	The power, privilege, and oppression paradigm that most schools of social work currently espouse to are often taught through an experiential approach to whiteness, privileging the majority of white students with the opportunity to explore their white identity at the expense of the learning of the Black/Brown, Indigenous, People of Color (BIPOC) students in the classroom. Many BIPOC students exper…			Advances in Social Work				2021-09-23	2021	2021-09-23		21	2/3	588-615	All OA; Gold	Article	Hanna, Michele D.; Arnold-Renicker, Heather; Garza, Barbara	Hanna, Michele D. (University of Denver GSSW); Arnold-Renicker, Heather (University of Denver Graduate School of Social Work); Garza, Barbara (University of Denver Graduate School of Social Work)		Hanna, Michele D. (University of Denver); Arnold-Renicker, Heather (University of Denver Graduate School of Social Work); Garza, Barbara (University of Denver Graduate School of Social Work)	22	11		13.52	https://journals.iupui.edu/index.php/advancesinsocialwork/article/download/24484/23862	https://app.dimensions.ai/details/publication/pub.1141335843	44 Human Society; 4409 Social Work
175	838	pub.1059436308	10.1093/bjsw/bct001			Social Work Perspectives on International Volunteer Service	International volunteer service has close historical and contemporary linkages with the social work profession. However, knowledge of international service continues to lag behind practice. This paper reviews recent trends in international volunteer service, and illustrates why this area may need greater attention from the social work profession. It summarises recent research from community partn…			The British Journal of Social Work				2013-01-21	2013	2013-01-21	2014-07-01	44	5	1340-1355	All OA; Green	Article	Lough, Benjamin J.	Lough, Benjamin J. (Benjamin Lough is an assistant professor at the University of Illinois at Urbana-Champaign. He recently worked as a resident consultant for the United Nations Volunteers Program, and is co-author of the newly released, UN State of the World's Volunteerism Report, . His research expertise is in community development, international volunteering and service, non-profit management…	Lough, Benjamin J. (University of Illinois at Urbana-Champaign)	Lough, Benjamin J. (University of Illinois at Urbana-Champaign)	20	3		5.25	https://figshare.com/articles/preprint/Social_Work_Perspectives_on_International_Volunteer_Service/9199127	https://app.dimensions.ai/details/publication/pub.1059436308	44 Human Society; 4409 Social Work
176	833	pub.1107992408	10.1093/bjsw/bcy107			Social Workers in China: Professional Identity in the Making	This article examines how front line Chinese social workers navigate between several professional ideals and mobilise different values through their everyday practices. Often starting the work without formal qualifications, their professional identity evolves through a combination of on-the-job training and supervision, studying national textbooks for qualifying exams, and exposure to internation…	The authors wish to thank the two anonymous reviewers for their criticism and suggestions. We are grateful for the trust shown us by the research participants in general, and for the opportunity to discuss analytical points with social workers from Lotus in particular.	A writing and collaboration grant from the China Postdoctoral Science Foundation (No. 2016M590081) supported Dong Niu’s work on this article. The research by Heidi Østbø Haugen was supported by the Research Council of Norway (grant numbers 222410 and 275002).	The British Journal of Social Work				2018-12-06	2018	2018-12-06	2019-10-01	49	7	1932-1949	All OA; Green	Article	Niu, Dong; Haugen, Heidi Østbø	Niu, Dong (School of International Studies/Academy of Overseas Chinese, Jinan University, Guangzhou, CN, People’s Republic of China); Haugen, Heidi Østbø (Department of Culture Studies and Oriental Languages, University of Oslo, NO, Norway)	Haugen, Heidi Østbø (University of Oslo)	Niu, Dong (Jinan University); Haugen, Heidi Østbø (University of Oslo)	27	13		10.17	https://www.duo.uio.no/bitstream/10852/77323/1/POSTPRINT%2bSocial%2bworkers%2bin%2bChina%2bProfessional%2bidentities%2bin%2bthe%2bmaking.pdf	https://app.dimensions.ai/details/publication/pub.1107992408	44 Human Society; 4409 Social Work
177	830	pub.1163496203	10.1080/02615479.2023.2248991			International students’ experience of supervision during social work field placement: troubling or transformative?	In Australia, international students have continued to enroll in social work programs for more than a decade. While there is an emerging interest in international students’ learning during field placement, their specific needs in the supervisory space have been largely neglected in the social work education literature. This article examines international students’ experience of field placement su…	The authors would like to thank the reviewers for their helpful comments on an earlier version of this article.		Social Work Education				2023-08-23	2023	2023-08-23	2024-11-16	43	8	2185-2200	All OA; Hybrid	Article	Hicks, Haidee; Egan, Ronnie	Hicks, Haidee (Social Work and Human Services, RMIT University, Melbourne, Australia); Egan, Ronnie (Social Work and Human Services, RMIT University, Melbourne, Australia)	Hicks, Haidee (RMIT University)	Hicks, Haidee (RMIT University); Egan, Ronnie (RMIT University)	1	1		1.12	https://www.tandfonline.com/doi/pdf/10.1080/02615479.2023.2248991?needAccess=true&role=button	https://app.dimensions.ai/details/publication/pub.1163496203	39 Education; 3904 Specialist Studies In Education; 44 Human Society; 4409 Social Work	4 Quality Education
178	820	pub.1141335818	10.18060/24124			Experiences With Imposter Syndrome and Authenticity at Research-Intensive Schools of Social Work: A Case Study on Black Female Faculty	TThere is little known about the experiences of Black women in schools of social work, specifically those situated within research-intensive (R-1) Carnegie-designated institutions. Experiences of imposter syndrome and authenticity often result in negative experiences and poor professional outcomes for Black women in academia. This study explores Black women social work faculty members’ sense of s…			Advances in Social Work				2021-09-23	2021	2021-09-23		21	2/3	354-373	All OA; Gold	Article	Fields, LaShawnda N.; Cunningham-Williams, Renee M.	Fields, LaShawnda N. (University of Arkansas); Cunningham-Williams, Renee M. (Washington University in St. Louis)		Fields, LaShawnda N. (University of Arkansas at Fayetteville); Cunningham-Williams, Renee M. (Washington University in St. Louis)	26	11		15.98	https://journals.iupui.edu/index.php/advancesinsocialwork/article/download/24124/23852	https://app.dimensions.ai/details/publication/pub.1141335818	44 Human Society; 4409 Social Work
179	820	pub.1174693013	10.1080/0312407x.2024.2380350			Telehealth in Mental Health Social Work: Benefits and Limitations within Practice	Telehealth is increasingly being adopted in mental health service delivery, particularly since the onset of COVID-19. However, the literature on the uses and applications of telehealth in mental health social work is still emerging, and a critical understanding of telehealth practice is vitally needed. This research explored how the use of telehealth impacts the practice of mental health social w…	The authors would like to thank the participants interviewed for this research for their time, and the anonymous reviewers for their constructive feedback on this article.		Australian Social Work				2024-08-12	2024	2024-08-12	2025-07-03	78	3	261-273	All OA; Hybrid	Article	Gilson, Tessa; Stewart, Catherine; Hodgson, David	Gilson, Tessa (Integrated Support Solutions WA, Balcatta, Western Australia, Australia; Curtin School of Allied Health, Curtin University, Perth, Western Australia, Australia); Stewart, Catherine (Curtin School of Allied Health, Curtin University, Perth, Western Australia, Australia); Hodgson, David (Curtin School of Allied Health, Curtin University, Perth, Western Australia, Australia)	Gilson, Tessa (Integrated Support Solutions WA, Balcatta, Western Australia, Australia; Curtin University)	Gilson, Tessa (Integrated Support Solutions WA, Balcatta, Western Australia, Australia; Curtin University); Stewart, Catherine (Curtin University); Hodgson, David (Curtin University)	1	1			https://www.tandfonline.com/doi/pdf/10.1080/0312407X.2024.2380350	https://app.dimensions.ai/details/publication/pub.1174693013	44 Human Society; 4409 Social Work	3 Good Health and Well Being
180	810	pub.1105687887	10.1177/0020872818788395			Mapping social work across 10 countries: Structure, intervention, identity and challenges	An emerging global consciousness and rising attention given to international social work development has seen the recognition of comparative research within the profession. Understanding the functioning and organisation of social work within various country contexts is critical in order to formulate knowledge around its overall impact, successes and challenges, allowing social workers to learn fr…		Funding The author(s) received no financial support for the research, authorship and/or publication of this article.	International Social Work				2018-07-18	2018	2018-07-18	2019-07	62	4	1183-1197	All OA; Green	Article	Ornellas, Abigail; Spolander, Gary; Engelbrecht, Lambert K; Sicora, Alessandro; Pervova, Irina; Martínez-Román, María-Asunción; Law, Agnus K; Shajahan, PK; Guerreiro, Maria das Dores; Casanova, José L; Garcia, Maria LT; Acar, Hakan; Martin, Linda; Strydom, Marianne	Ornellas, Abigail (Stellenbosch University, South Africa); Spolander, Gary (Coventry University, UK); Engelbrecht, Lambert K (Stellenbosch University, South Africa); Sicora, Alessandro (University of Calabria, Italy); Pervova, Irina (St Petersburg State University, Russia); Martínez-Román, María-Asunción (University of Alicante, Spain); Law, Agnus K (Sun Yat-sen University, China); Shajahan, PK (…	Ornellas, Abigail (Stellenbosch University)	Ornellas, Abigail (Stellenbosch University); Spolander, Gary (Coventry University); Engelbrecht, Lambert K (Stellenbosch University); Sicora, Alessandro (University of Calabria); Pervova, Irina (St Petersburg University); Martínez-Román, María-Asunción (University of Alicante); Law, Agnus K (Sun Yat-sen University); Shajahan, PK (Tata Institute of Social Sciences); Guerreiro, Maria das Dores (Uni…	22	5		8.29	https://rgu-repository.worktribe.com/output/1328504	https://app.dimensions.ai/details/publication/pub.1105687887	44 Human Society; 4409 Social Work
181	801	pub.1047086022	10.1093/bjsw/bcs129			Editorial		We are very grateful to the British Journal of Social Work Editors, Jim Campbell and John Pinkerton, and the Journal&#x27;s administrator, Penny Brown, for their help and support throughout the process of bringing this issue to fruition.		The British Journal of Social Work				2012-09-01	2012	2012-09-12	2012-09-01	42	6	1013-1021	All OA; Bronze	Article	Spalek, Basia; McDonald, Laura Zahra	Spalek, Basia (Guest Editors); McDonald, Laura Zahra (Guest Editors)		Spalek, Basia (Guest Editors); McDonald, Laura Zahra (Guest Editors)	7	1		1.9	https://academic.oup.com/bjsw/article-pdf/42/6/1013/4611527/bcs129.pdf	https://app.dimensions.ai/details/publication/pub.1047086022	44 Human Society; 4409 Social Work
182	793	pub.1105388935	10.31265/jcsw.v7i1.78			Exploring the Intersection of Culture and Education in Nunavik	During the last century, Nunavik’s Inuit population has experienced social transformations which have manifested themselves in a range of social issues. Nunavik lies north of the 55th parallel in Quebec, Canada and is one of four regions in Canada that comprise Inuit Nunaat (Inuvialuit, Nunatsiavut, Nunavik, and Nunavut) – Inuit homeland. The Inuit are one of three distinct Indigenous groups in C…			Journal of Comparative Social Work				2012-04-02	2012	2012-04-02		7	1	18-35	All OA; Gold	Article	Ives, Nicole; Sinha, Vandna; Leman, Dominique; Levy-Powell, Robert; Thomson, Wendy	Ives, Nicole (); Sinha, Vandna (); Leman, Dominique (); Levy-Powell, Robert (); Thomson, Wendy ()		Ives, Nicole (); Sinha, Vandna (); Leman, Dominique (); Levy-Powell, Robert (); Thomson, Wendy ()	5	0		1.36	https://journals.uis.no/index.php/JCSW/article/download/78/61	https://app.dimensions.ai/details/publication/pub.1105388935	44 Human Society; 4409 Social Work
183	784	pub.1103365595	10.15270/54-1-611			A CRITICAL REVIEW OF RESILIENCE THEORY AND ITS RELEVANCE FOR SOCIAL WORK	As resilience theory gains traction as a theoretical framework for research in social work, it is important to engage with it critically. This article provides a critical review of resilience theory, drawing on an array of key authors, dating back fifty years. The review addresses three aspects of resilience theory: its definition, the construction of adversity and outcomes, and the nature and sc…			Social Work/Maatskaplike Werk				2018-04	2018	2018-04		54	1	1-18	All OA; Gold	Article	Van Breda, Adrian	Van Breda, Adrian (University of Johannesburg)		Van Breda, Adrian (University of Johannesburg)	352	136		132.6	https://socialwork.journals.ac.za/pub/article/download/611/565	https://app.dimensions.ai/details/publication/pub.1103365595	44 Human Society; 4409 Social Work	11 Sustainable Cities and Communities
184	781	pub.1120091988	10.1111/chso.12356			The Principles and Ethics of Including Children with Disability in Child Research	This paper provides a set of principles and ethics, developed in collaboration between Pacific‐ and Australian‐based researchers, to guide research practice in a project enabling the self‐reporting of children with disability in Vanuatu and Papua New Guinea (PNG). The paper presents both a summary of academic literature relating to these principles and ethics, as well as their succinct ‘translati…	Acknowledgements The authors are grateful to the following people for their contributions: the children and families in rural and urban locations of Papua New Guinea and Vanuatu who shared their personal stories with the researchers; the dedicated research assistants from the Papua New Guinea Assembly of Disabled Persons (PNG ADP), Save the Children Papua New Guinea and Save the Children Vanuatu …		Children & Society				2019-08-02	2019	2019-08-02	2020-01	34	1	1-16	All OA; Bronze	Article	Jenkin, Elena; Wilson, Erin; Campain, Robert; Clarke, Matthew	Jenkin, Elena (School of Humanities and Social Sciences, Deakin University, Burwood, VIC, Australia); Wilson, Erin (School of Health and Social Development, Deakin University, Burwood, VIC, Australia; Centre for Social Impact, Faculty of Business and Law, Swinburne University of Technology, Hawthorn, VIC, Australia); Campain, Robert (School of Humanities and Social Sciences, Deakin University, Bu…	Wilson, Erin (Deakin University; Swinburne University of Technology)	Jenkin, Elena (Deakin University); Wilson, Erin (Deakin University; Swinburne University of Technology); Campain, Robert (Deakin University; Swinburne University of Technology); Clarke, Matthew (Deakin University)	25	11		9.98	https://onlinelibrary.wiley.com/doi/pdfdirect/10.1111/chso.12356	https://app.dimensions.ai/details/publication/pub.1120091988	44 Human Society; 4407 Policy and Administration; 4409 Social Work; 4410 Sociology
185	781	pub.1149850765	10.1080/02615479.2022.2105316			Applying transdisciplinary sustainability transitions research in international social work doctoral training	In the last 15 years, transdisciplinary research of sustainability transitions has become an increasingly powerful approach. We discuss it as a perspective for social work discipline, and as a theoretical-conceptual frame of a new international doctoral training and research programme in social work taking place in seven European countries. In our qualitative study, we investigate how the partici…	We highly acknowledge the collaboration with the Early Stage Researchers Miroslav Budimir, Rebecca Conway, Svenja Fischbach, Eileen Lauster, Kang Liu, Athina Moroglou, Areen Nassar, James Obeng, Ioannis Perifanos, Shailendra Rai, Atefeh Safarabadi Farahani, Amy Shackelford, Michael Emru Tadesse, and Jeany Rose Teguihanon.	This work was supported by the European Union’s Horizon 2020 Research and Innovation Programme under the Marie Skłodowska-Curie Grant Agreement (Identity number). This article reflects the authors’ views and the European Commission is not responsible for any use that may be made of the information it contains.	Social Work Education				2022-07-28	2022	2022-07-28	2022-10-03	41	7	1541-1559	All OA; Bronze	Article	Matthies, Aila-Leena; Hermans, Koen; Leskošek, Vesna	Matthies, Aila-Leena (Kokkola University Consortium Chydenius, University of Jyväskylä, Kokkola, Finland); Hermans, Koen (Centre for Sociological Research, Catholic University of Leuven, Leuven, Belgium); Leskošek, Vesna (Faculty of social work, University of Ljubljana, Ljubljana, Slovenia)	Matthies, Aila-Leena (University of Jyväskylä)	Matthies, Aila-Leena (University of Jyväskylä); Hermans, Koen (KU Leuven); Leskošek, Vesna (University of Ljubljana)	3	2		3.38	https://www.tandfonline.com/doi/pdf/10.1080/02615479.2022.2105316?needAccess=true	https://app.dimensions.ai/details/publication/pub.1149850765	44 Human Society; 4409 Social Work
186	774	pub.1186027030	10.18060/27431			Injustice is Ahistorical: A Case Study of St. Louis	The purpose of this paper is to demonstrate the importance of historical context in social work practice, research, and teaching. Understanding the evolution of racist policies and practices is necessary for developing antiracist practices that promote racial equity. Using St. Louis as a case study, the manuscript describes how racist policies and practices evolved over time between the 1900s and…			Advances in Social Work				2024-12-30	2024	2024-12-30		24	3	639-656	All OA; Gold	Article	Gearhart, Michael	Gearhart, Michael (University of Missouri-St. Louis)		Gearhart, Michael (University of Missouri–St. Louis)	0	0			https://doi.org/10.18060/27431	https://app.dimensions.ai/details/publication/pub.1186027030	44 Human Society; 4409 Social Work	4 Quality Education
187	769	pub.1001873635	10.1080/13691457.2016.1255925			Linking family engagement with a rights perspective: macro factors influencing practice	While child welfare practitioners in many countries are struggling to develop methods of effective family engagement, they operate within different national and cultural contexts that influence, both positively and negatively, the ability to engage with families. Increasingly, international comparisons are necessary to further understanding of the development of social work practice. This is part…			European Journal of Social Work				2016-11-30	2016	2016-11-30	2018-01-02	21	1	45-60	All OA; Green	Article	Duffy, Joe; Collins, Mary; Kim, Sook Hyun	Duffy, Joe (School of Social Sciences, Education and Social Work, Queen’s University, Belfast, UK); Collins, Mary (Social Welfare Policy Department, Boston University School of Social Work, Boston, MA, USA); Kim, Sook Hyun (Department of Social Work, Roberts Wesleyan College, New York, USA)	Kim, Sook Hyun (Roberts Wesleyan College)	Duffy, Joe (Queen's University Belfast); Collins, Mary (Boston University); Kim, Sook Hyun (Roberts Wesleyan College)	9	3		2.54	https://pure.qub.ac.uk/files/33279525/linking_family_engagement.pdf	https://app.dimensions.ai/details/publication/pub.1001873635	44 Human Society; 4409 Social Work
188	762	pub.1144582804	10.1111/ijsw.12526			Exploring how international social workers perceive culturally relevant practices: A case study of Japanese social workers’ experiences in other Asian countries	Abstract This pilot case study, as part of an international social work research project, explored how culturally relevant collaborative practices were perceived by international social workers. Semi‐structured interviews were conducted with social workers ( n = 4) who had worked as Japan Overseas Cooperation Volunteers for 2 years in another Asian country. Thematic analysis was applied to their …	ACKNOWLEDGEMENTS The author would like to express his sincere gratitude to all the interviewees for sharing their experiences. Moreover, the author is grateful to the Japan International Cooperation Agency (JICA) for supporting this study. The views expressed in this paper are those of the author and do not necessarily reflect the views of JICA. CONFLICT OF INTEREST The author declared no potenti…	Funding information This work was supported by JSPS KAKENHI Grant Number JP21K13477	International Journal of Social Welfare				2022-01-11	2022	2022-01-11	2022-07	31	3	347-354	All OA; Hybrid	Article	Higashida, Masateru	Higashida, Masateru (Department of Social Welfare, Aomori University of Health and Welfare, Aomori, Japan)	Higashida, Masateru (Aomori University of Health and Welfare)	Higashida, Masateru (Aomori University of Health and Welfare)	2	1		2.25	https://onlinelibrary.wiley.com/doi/pdfdirect/10.1111/ijsw.12526	https://app.dimensions.ai/details/publication/pub.1144582804	44 Human Society; 4409 Social Work
189	754	pub.1176011336	10.1007/s41134-024-00329-9			Navigating Minefields: Social Work with People with Disabilities in the Context of War	The systematic dehumanization of people with disabilities in peaceful times is magnified in times of war and during post-war periods, especially in regions and countries with prevalent medical-pathological approaches towards individuals with disabilities. This discussion combines historical, current, and anticipated impacts and integrates the experiences of practitioners and communities. Using cr…		The work by the first author was partially funded by the Slovenian Research and Innovation Agency ARIS within the research grant “Social work as the bearer of the processes of social justice and inclusion in Slovenia - theoretical, methodological and methodical perspectives and historical development” (number: P5-0058).	Journal of Human Rights and Social Work				2024-09-01	2024	2024-09-26	2024-09-01	9	3	441-452	All OA; Hybrid	Article	Zaviršek, Darja; Cox, James	Zaviršek, Darja (Faculty of Social Work, University of Ljubljana, Ljubljana, Slovenia); Cox, James (University of Dundee, Dundee, Scotland)	Zaviršek, Darja (University of Ljubljana)	Zaviršek, Darja (University of Ljubljana); Cox, James (University of Dundee)	3	3			https://link.springer.com/content/pdf/10.1007/s41134-024-00329-9.pdf	https://app.dimensions.ai/details/publication/pub.1176011336	44 Human Society; 4409 Social Work	16 Peace, Justice and Strong Institutions; 4 Quality Education
190	739	pub.1163190633	10.1111/cfs.13066			Child placement in the community: Socio‐religious challenges for Druze social workers in Israel	Abstract This article features insights from 15 Druze social workers in Israel regarding their experiences dealing with out‐of‐home placement for Druze children. The study reveals the distinct challenges faced by social workers in bridging professional and socio‐religious values and the caution with which they navigate a complex reality and strive to provide culturally appropriate interventions w…	ACKNOWLEDGEMENTS The authors express their sincere gratitude to the Druze social workers who generously participated in the interviews, sharing invaluable insights into their experiences with out‐of‐home placement within the Druze community. CONFLICT OF INTEREST STATEMENT The authors have no conflicts of interest to declare.	Funding information This study was conducted without receiving any funding from external sources.	Child & Family Social Work				2023-08-10	2023	2023-08-10	2024-02	29	1	217-228	All OA; Hybrid	Article	Natoor, Maha; Zarka, Hoda; Shoshana, Avihu	Natoor, Maha (University of Haifa, Haifa, Israel); Zarka, Hoda (Department of Counseling and Human Development, Faculty of Education, University of Haifa, Haifa, Israel); Shoshana, Avihu (Faculty of Education, University of Haifa, Haifa, Israel)	Natoor, Maha (University of Haifa)	Natoor, Maha (University of Haifa); Zarka, Hoda (University of Haifa); Shoshana, Avihu (University of Haifa)	0	0		0	https://onlinelibrary.wiley.com/doi/pdfdirect/10.1111/cfs.13066	https://app.dimensions.ai/details/publication/pub.1163190633	44 Human Society; 4409 Social Work
191	719	pub.1160214866	10.15270/59-2-1114			“I AM TOTALLY ISOLATED”: EXPERIENCES OF ADULTS WITH ACQUIRED PHYSICAL DISABILITIES DURING COVID-19 PANDEMIC LOCKDOWN IN SOUTH AFRICA	The sudden onset of the COVID-19 pandemic impacted various sectors, including social work services to persons with physical disabilities. This qualitative study focused on the experiences of adults with an acquired physical disability who needed social work support. To understand these experiences, an ecological perspective was utilised as a theoretical basis. The study was conducted during the C…			Social Work/Maatskaplike Werk				2023	2023	2023	2023	59	2	1-23	All OA; Gold	Article	Muller-Kluits, Noreth; Slabbert, Ilze	Muller-Kluits, Noreth (Stellenbosch University); Slabbert, Ilze (Stellenbosch University)		Muller-Kluits, Noreth (Stellenbosch University); Slabbert, Ilze (Stellenbosch University)	0	0		0	https://socialwork.journals.ac.za/pub/article/view/1114/957	https://app.dimensions.ai/details/publication/pub.1160214866	44 Human Society; 4409 Social Work
192	708	pub.1164277953	10.17352/ojt.000042			Mapping crisis intervention course into social work academic curricula in Lebanon	Social work is strongly presented to support and decrease the suffering of people living in a crisis. The call to intervene professionally in such cases is highly demanded by government institutions, non-governmental organizations, international organizations, and United Nations agencies, the main umbrella that enfolded practitioner social workers in Lebanon.			Open Journal of Trauma				2023-08-30	2023	2023-08-30		7	1	012-021	All OA; Gold	Article	Rania, Mansour	Rania, Mansour ()		Rania, Mansour ()	2	2		3.49	https://www.peertechzpublications.org/articles/OJT-7-142.pdf	https://app.dimensions.ai/details/publication/pub.1164277953	44 Human Society; 4409 Social Work
193	704	pub.1117401569	10.5195/jyd.2019.714			Community Youth Development Service-Learning: Trauma-Informed and Culturally Responsive	As the demographics of the United States change, it is important for youth workers to be able to adapt. Most established forms of youth services model the norms and values of the dominant Western culture. To best engage with a complete spectrum of youth, it is vital to take their backgrounds into account. This means being trauma-informed, culturally responsive, and mindful of serving the whole co…			Journal of Youth Development				2019-06-20	2019	2019-06-20		14	2	99-114	All OA; Gold	Article	Verde, Philip Monte; Watkins, Marie; Enriquez, Donovan; Nater-Vazquez, Shalym; Harris, John C.	Verde, Philip Monte (Nazareth College); Watkins, Marie (Nazareth College); Enriquez, Donovan (Nazareth College); Nater-Vazquez, Shalym (Ibero-American Action League); Harris, John C. (Eugenio María de Hostos Charter School)		Verde, Philip Monte (Nazareth College); Watkins, Marie (Nazareth College); Enriquez, Donovan (Nazareth College); Nater-Vazquez, Shalym (Ibero-American Action League); Harris, John C. (Eugenio María de Hostos Charter School)	2	0		0.88	https://jyd.pitt.edu/ojs/jyd/article/download/19-14-02-FA-06/818	https://app.dimensions.ai/details/publication/pub.1117401569	44 Human Society; 4409 Social Work
194	696	pub.1150862872	10.1177/14733250221124215			Conversation analysis in social work research: a scoping review	Given the emphasis on communication in social work, the empirical study of social work interactions is an important area for research. By examining recordings of naturally occurring social interaction and analysing participants’ practices in close detail, conversation analysis (CA) provides rigorous resources for understanding the practical challenges and opportunities of professional interventio…		FundingThe author(s) received no financial support for the research, authorship, and/or publication of this article.	Qualitative Social Work				2022-09-08	2022	2022-09-08	2022-11	21	6	1011-1042	All OA; Hybrid	Article	Flinkfeldt, Marie; Iversen, Clara; Jørgensen, Sabine Ellung; Monteiro, David; Wilkins, David	Flinkfeldt, Marie (Uppsala University, Uppsala, Sweden); Iversen, Clara (Uppsala University, Uppsala, Sweden); Jørgensen, Sabine Ellung (University College South Denmark, Kolding, Denmark); Monteiro, David (CLISSIS, Lisboa, Portugal); Wilkins, David (Cardiff University, Cardiff, UK)	Flinkfeldt, Marie (Uppsala University)	Flinkfeldt, Marie (Uppsala University); Iversen, Clara (Uppsala University); Jørgensen, Sabine Ellung (University College South Denmark); Monteiro, David (CLISSIS, Lisboa, Portugal); Wilkins, David (Cardiff University)	10	9		11.27	https://journals.sagepub.com/doi/pdf/10.1177/14733250221124215	https://app.dimensions.ai/details/publication/pub.1150862872	44 Human Society; 4409 Social Work
195	677	pub.1099607398	10.1080/02650533.2017.1394829			A Risky Time for Muslim Families: Professionalised Counter-radicalisation Networks	In July 2015, a new statutory duty was sanctioned in the UK for a range of professional practitioners, including social workers, to pay ‘due regard to preventing terrorism’. The duty has contributed to a shifting of social work practice and decision-making from the fields of advocacy and promotion of ethics, social justice and human rights, towards risk-work more analogous to that of the security…			Journal of Social Work Practice				2017-10-02	2017	2017-12-05	2017-10-02	31	4	477-490	All OA; Green	Article	Stanley, Tony; Guru, Surinder; Coppock, Vicki	Stanley, Tony (); Guru, Surinder (); Coppock, Vicki ()		Stanley, Tony (); Guru, Surinder (); Coppock, Vicki ()	26	5		8.55	https://research.edgehill.ac.uk/en/publications/03522c6e-11a3-4a5b-8eeb-853206244ffa	https://app.dimensions.ai/details/publication/pub.1099607398	44 Human Society; 4409 Social Work	16 Peace, Justice and Strong Institutions
196	673	pub.1151269958	10.1007/s10896-022-00441-2			Healthcare Students’ and Educators’ Views on the Integration of Gender-Based Violence Education into the Curriculum: a Qualitative Inquiry in Three Countries	PurposeHealth and social care professionals are ideally placed to identify and address gender-based violence (GBV), yet research continues to demonstrate that the subject is being poorly covered at undergraduate level. This qualitative study explored health and social care students’ and educators’ views on GBV education, with a view to identifying ‘best practice’. We aimed to capture students’ an…		We are grateful to U21 Health Sciences Group for funding this project.	Journal of Family Violence				2022-09-23	2022	2022-09-23	2023-10	38	7	1469-1481	All OA; Hybrid	Article	Sammut, Dana; Ferrer, Lilian; Gorham, Emily; Hegarty, Kelsey; Kuruppu, Jacqueline; Salvo, Francisca Lopez; Bradbury-Jones, Caroline	Sammut, Dana (Institute of Clinical Sciences, College of Medical and Dental Sciences, University of Birmingham, Edgbaston, B15 2TT, Birmingham, UK); Ferrer, Lilian (The Pontifical Catholic University of Chile, Santiago, Chile); Gorham, Emily (Institute of Clinical Sciences, College of Medical and Dental Sciences, University of Birmingham, Edgbaston, B15 2TT, Birmingham, UK); Hegarty, Kelsey (Univ…	Bradbury-Jones, Caroline (University of Birmingham)	Sammut, Dana (University of Birmingham); Ferrer, Lilian (Pontificia Universidad Católica de Chile); Gorham, Emily (University of Birmingham); Hegarty, Kelsey (University of Melbourne); Kuruppu, Jacqueline (University of Melbourne); Salvo, Francisca Lopez (Pontificia Universidad Católica de Chile); Bradbury-Jones, Caroline (University of Birmingham)	5	5		3.37	https://link.springer.com/content/pdf/10.1007/s10896-022-00441-2.pdf	https://app.dimensions.ai/details/publication/pub.1151269958	44 Human Society; 4402 Criminology; 4409 Social Work; 52 Psychology; 5205 Social and Personality Psychology	16 Peace, Justice and Strong Institutions; 4 Quality Education; 5 Gender Equality
197	670	pub.1168278259	10.4314/ajsw.v13i2.5			Nexus between climate change and environmental social work in Africa	Disasters indiscriminately cause huge global economic losses worth tens of billions of dollars and often result in deaths of millions of people annually. As such, the on-going climate change is the world’s biggest disaster, especially for the most vulnerable African countries that are less economically developed, dependent largely on primary industries, which are predominantly reliant on climate-…			African Journal of Social Work				2023-04-30	2023	2023-04-30		13	2	87-99	All OA; Gold	Article	Pedzisai, Ezra; Charamba, Sunungurai; Mukurazhizha, Rudo	Pedzisai, Ezra (); Charamba, Sunungurai (); Mukurazhizha, Rudo ()		Pedzisai, Ezra (); Charamba, Sunungurai (); Mukurazhizha, Rudo ()	4	4		6.98	https://www.ajol.info/index.php/ajsw/article/download/262517/247829	https://app.dimensions.ai/details/publication/pub.1168278259	44 Human Society; 4409 Social Work	1 No Poverty; 13 Climate Action
198	663	pub.1128291579	10.22329/csw.v13i1.5848			Anti-Oppression Through a Postmodern Lens:	Anti-oppression discourse has emerged within critical social work in an effort to address issues of diversity, difference, and inclusion. Drawing upon Audre Lorde’s (1984) famous words “the master’s tools will never dismantle the master’s house” this paper will argue that modernist aspects of anti-oppressive discourse may unwittingly deploy the masters’ or dominant conceptual tools. A critical re…			Critical Social Work				2019-05-29	2019	2019-05-29		13	1		All OA; Gold	Article	Brown, Catrina G.	Brown, Catrina G. (School of Social Work, Cross Appointed Gender and Women’s Studies Associate Professor, Dalhousie University)		Brown, Catrina G. (Dalhousie University)	11	3		4.82	https://ojs.uwindsor.ca/index.php/csw/article/download/5848/4821	https://app.dimensions.ai/details/publication/pub.1128291579	44 Human Society; 4409 Social Work
199	653	pub.1091200952	10.1016/j.childyouth.2017.08.015			How aware of child sexual abuse (CSA) are ethnic minority communities? A literature review and suggestions for raising awareness in Australia	A systematic literature review was conducted to help address the gap in national and international knowledge about child sexual abuse (CSA) and ethnic minority communities. This paper reports the findings of that review in relation to the theme of community awareness. The results suggest that awareness of CSA may be low in ethnic minority communities due to misperceptions that it is ‘a Western pr…	AcknowledgmentsWe would like to thank Professor Fiona Arney, Professor Leah Bromfield, Dr. Jen Hamer, and Professor Patrick O&#x27;Leary for their comments and feedback on an earlier version. We would also like to thank the anonymous reviewers of this article for their comments and feedback, which have been incorporated into the manuscript. Conflict of interestThere is no known conflict of intere…		Children and Youth Services Review				2017-10	2017		2017-10	81		246-260	All OA; Green	Article	Sawrikar, Pooja; Katz, Ilan	Sawrikar, Pooja (School of Human Services and Social Work (HSV), Griffith University (GU), Gold Coast campus, Parklands Drive, Southport, Queensland 4222, Australia); Katz, Ilan (Social Policy Research Centre (SPRC), University of New South Wales (UNSW), Australia)	Sawrikar, Pooja (Griffith University)	Sawrikar, Pooja (Griffith University); Katz, Ilan (UNSW Sydney)	16	2		5.26	http://hdl.handle.net/10072/347246	https://app.dimensions.ai/details/publication/pub.1091200952	44 Human Society; 4409 Social Work
200	632	pub.1148029866	10.1002/ajs4.222			Should social work become a registered profession? An examination of the views of 15 Australian social workers	Abstract In contrast to most Western jurisdictions, social work in Australia is not currently a registered profession. However, in late 2021, the South Australian Parliament passed a Bill to register social workers in that state. This follows a long‐standing but previously unsuccessful campaign by the Australian Association of Social Workers (AASW) to attain social work registration at a national…	CONFLICT OF INTEREST No conflicts of interest exist.		Australian Journal of Social Issues				2022-05-20	2022	2022-05-20	2023-06	58	2	343-359	All OA; Hybrid	Article	Tangney, Meghan; Mendes, Philip	Tangney, Meghan (Department of Social Work, Monash University, East Caulfield, Victoria, Australia); Mendes, Philip (Department of Social Work, Monash University, East Caulfield, Victoria, Australia)	Mendes, Philip (Monash University)	Tangney, Meghan (Monash University); Mendes, Philip (Monash University)	6	3		6.76	https://onlinelibrary.wiley.com/doi/pdfdirect/10.1002/ajs4.222	https://app.dimensions.ai/details/publication/pub.1148029866	44 Human Society; 4409 Social Work
201	631	pub.1101403374	10.1080/15426432.2018.1446863			State, profession, and religion: Reflecting on spirituality and indigenous social work in China in the Yushu Earthquake Relief	On April 14, 2010, a massive earthquake measuring 7.1Ms struck the Yushu Tibetan Autonomous Prefecture, Qinghai Province, China. Its scale notwithstanding, it has received much less national and international attention than the also immense Wenchun quake of 2008 in Sichun Province. This field report discusses the contribution of religion and spirituality in postdisaster relief in Yushu. It also c…		Acknowledgment is given to Queen Anne’s Gate Foundation’s financial support for first author’s research in mainland China.	Journal of Religion & Spirituality in Social Work Social Thought				2018-03-09	2018	2018-03-09	2018-04-03	37	2	146-165	All OA; Green	Article	Ku, Hok Bun; Wong, Yuk-Lin Renita	Ku, Hok Bun (Department of Applied Social Sciences, The Hong Kong Polytechnic University, Hong Kong, China); Wong, Yuk-Lin Renita (School of Social Work, York University, Toronto, Canada)	Ku, Hok Bun (Hong Kong Polytechnic University)	Ku, Hok Bun (Hong Kong Polytechnic University); Wong, Yuk-Lin Renita (York University)	4	1		1.51	http://ira.lib.polyu.edu.hk/bitstream/10397/77926/1/Ku_State_Profession_Religion.pdf	https://app.dimensions.ai/details/publication/pub.1101403374	44 Human Society; 4409 Social Work
202	631	pub.1160214869	10.15270/59-2-1124			MANAGEMENT TASKS OF SOCIAL WORKERS SUPERVISING EARLY CHILDHOOD DEVELOPMENT (ECD) CENTRES: IDENTIFYING THE AREAS FOR PROFESSIONAL DEVELOPMENT	Early Childhood Development (ECD) has become a priority area of social work, in both developed and developing countries. In this article, the term ECD supervisors refers to the social workers working with ECD centres in the capacity of supervisor. These social workers can provide valuable insight into the unique management tasks and associated professional development areas uniquely required when…			Social Work/Maatskaplike Werk				2023	2023	2023	2023	59	2	109-126	All OA; Gold	Article	Ronaasen, Jessica; Engelbrecht, Lambert K	Ronaasen, Jessica (Stellenbosch University); Engelbrecht, Lambert K (Stellenbosch University)		Ronaasen, Jessica (Stellenbosch University); Engelbrecht, Lambert K (Stellenbosch University)	0	0		0	https://socialwork.journals.ac.za/pub/article/view/1124/962	https://app.dimensions.ai/details/publication/pub.1160214869	44 Human Society; 4409 Social Work	4 Quality Education
203	629	pub.1184321775	10.1016/j.childyouth.2025.108135			Reifying risk and health: Cultural normativity, bureaucracy, and moral quandary in child abuse investigations in Japan	Background Risk is a focal point of casework in Japanese child protection; child abuse and its prevention have been social and policy issues for over thirty years. In response, a growing labor force of civil servants performs as child protection caseworkers; yet inequities in care practice and outcome remain stark. Objective Understand how risk is perceived and used in casework practice and how t…	Declaration of competing interest The author declares that they have no known competing financial interests or personal relationships that could have appeared to influence the work reported in this paper.	The research this paper is based on was supported by a Fulbright Graduate Research Fellowship (30688) and a Japan Foundation Endowment Committee research grant (652 0420).	Children and Youth Services Review				2025-03	2025		2025-03	170		108135	All OA; Hybrid	Article	Chapman, Christopher	Chapman, Christopher (Institute of Social and Cultural Anthropology, University of Oxford, United Kingdom; Department of Anthropology, University of Hawaiʻi at Mānoa, United States)	Chapman, Christopher (University of Oxford; University of Hawaiʻi at Mānoa)	Chapman, Christopher (University of Oxford; University of Hawaiʻi at Mānoa)	0	0			https://doi.org/10.1016/j.childyouth.2025.108135	https://app.dimensions.ai/details/publication/pub.1184321775	44 Human Society; 4407 Policy and Administration; 4409 Social Work	3 Good Health and Well Being
204	618	pub.1060042446	10.1093/sw/44.1.70			Multiservice Centers in Chinese American Immigrant Communities: Practice Principles and Challenges	This article presents a multiservice center approach to service delivery in three Chinese immigrant communities in the United States. The operation of this approach is characterized by the DECENT (developmental, educational, comprehensive, empowerment, networking, and teamwork) principle. These multiservice centers were found to be successful and well received in meeting the needs of the communit…			Social Work				1999-01-01	1999	1999-01-01	1999-01-01	44	1	70-81	All OA; Green	Article	Chow, Julian	Chow, Julian (School of Social Welfare, University at Albany, State University of New York, 135 Western Avenue, Albany, NY 12222, ; e-mail:, jchow@cnsvax.albany.edu)		Chow, Julian (State University of New York at Albany)	43	1			https://escholarship.org/uc/item/07s8d6pb	https://app.dimensions.ai/details/publication/pub.1060042446	44 Human Society; 4409 Social Work
205	611	pub.1158258146	10.1177/14733250231178259			The value of sourcing social work journals for critical discourse analysis	Using the contents of journals has been an underutilized research approach in social work. Journal archives represent what has been legitimated in the discipline as well as what forms the dominant social work canon. To theorize about journal archival sourcing as a research method, we cite the limited extant examples, drawing out from these the methodology used. We then make a case for the value o…		FundingThe author(s) received no financial support for the research, authorship, and/or publication of this article.	Qualitative Social Work				2023-05-22	2023	2023-05-22	2024-01	23	1	76-90	All OA; Hybrid	Article	Morgenshtern, Marina; Schmid, Jeanette	Morgenshtern, Marina (Department of Social Work, Trent University Durham-GTA, Oshawa, ON, Canada); Schmid, Jeanette (Faculty of Health Sciences and Human Services, Social Work Program, Vancouver Island University, Nanaimo, BC, Canada)	Schmid, Jeanette (Vancouver Island University)	Morgenshtern, Marina (Department of Social Work, Trent University Durham-GTA, Oshawa, ON, Canada); Schmid, Jeanette (Vancouver Island University)	1	0		1.75	https://journals.sagepub.com/doi/pdf/10.1177/14733250231178259	https://app.dimensions.ai/details/publication/pub.1158258146	44 Human Society; 4409 Social Work
206	601	pub.1059435949	10.1093/bjsw/bcr012			Reasoning Processes in Child Protection Decision Making: Negotiating Moral Minefields and Risky Relationships	This paper investigates the reasoning processes of social workers in child protection social work as they make decisions. Within this interpretive process, they assign meaning to clients' behaviours in a context containing a multitude of competing discourses relating to the nature and cause of clients' problems. The study used a qualitative approach, specifically a critical incident framework. It…	This study was supported by a University of Otago Research Grant. Many thanks to the Open Home Foundation (NZ) and the anonymous reviewers of this article for their insightful and useful feedback.		The British Journal of Social Work				2011-03-10	2011	2011-03-10	2011-10-01	41	7	1251-1270	All OA; Green	Article	Keddell, Emily	Keddell, Emily (Emily teaches in the social work programme at the University of Otago. Her practice background includes child protection, family support and residential social work with children. She is a Ph.D. candidate and her research interests include social work practice with children and families, ethnic and cultural identities, the use of the arts in teaching social work and cultural compe…	Keddell, Emily (University of Otago)	Keddell, Emily (University of Otago)	64	6		15.4	http://hdl.handle.net/10523/6612	https://app.dimensions.ai/details/publication/pub.1059435949	44 Human Society; 4409 Social Work
207	566	pub.1185662900	10.23889/suthesis.68911			Barriers to Culturally Sensitive Care for Muslim Families: Healthcare Providers' and Social Work Perspectives on the Role of Islamic Faith in Parental End-of-Life Decision-Making for Children	Cronfa is the Swansea University repository. It provides access to a growing body of full text research publications produced by the University's researchers.							2025-01	2025						All OA; Green	Article	NABAG, EIMAN	NABAG, EIMAN ()		NABAG, EIMAN ()	0	0			https://cronfa.swan.ac.uk/Record/cronfa68911/Download/68911__33611__2099131f6e0c4bce9f7cb7901ca7e703.pdf	https://app.dimensions.ai/details/publication/pub.1185662900	44 Human Society; 4409 Social Work; 50 Philosophy and Religious Studies	3 Good Health and Well Being
208	539	pub.1171255538	10.1177/00208728241245916			Exploring the state of Qatar’s child protection system through the lens of frontline social workers	The child protection system in Qatar is newly developed and still fragmented and lacking a comprehensive legal framework. Qualitative interviews were conducted with a sample of social workers in civil society organizations within the Qatar Social Work Foundation to understand barriers encountered by social workers in child protection and strategies used to overcome these barriers. Findings sugges…		Funding The author(s) received no financial support for the research, authorship, and/or publication of this article.	International Social Work				2024-04-30	2024	2024-04-30	2024-09	67	5	1239-1255	All OA; Hybrid	Article	Alhajaji, Asmaa; Aref, Ahmed; Lansford, Jennifer E	Alhajaji, Asmaa (Qatar Social Work, Qatar); Aref, Ahmed (University of Bath, UK; Qatar Foundation, Qatar); Lansford, Jennifer E (Duke University, USA)	Aref, Ahmed (University of Bath; Qatar Foundation)	Alhajaji, Asmaa (Qatar Social Work, Qatar); Aref, Ahmed (University of Bath; Qatar Foundation); Lansford, Jennifer E (Duke University)	1	1			https://journals.sagepub.com/doi/pdf/10.1177/00208728241245916	https://app.dimensions.ai/details/publication/pub.1171255538	44 Human Society; 4407 Policy and Administration; 4409 Social Work	16 Peace, Justice and Strong Institutions
209	539	pub.1132665422	10.21608/jfss.2020.122145			Practicing e-social work (benefits & obstacles) An applied study to some social agencies in Asyut Governorate	The current study problem was to identify the benefits and obstacles of practicing electronic social work. The aims of the study were: 1- Determining the reasons for the need to practice electronic social work. 2- Determining the benefits of practicing electronic social work. 3- Monitoring the obstacles facing electronic social work. 4- Providing a set of recommendations to increase the efficienc…			مجلة کلية الخدمة الاجتماعية للدراسات والبحوث الاجتماعية				2020-10-01	2020	2020-10-01	2020-10-01	21	العدد 21 الجزء الثالث	17-54	All OA; Gold	Article	حسانین, أمل عبد الکریم عباس	حسانین, أمل عبد الکریم عباس ()		حسانین, أمل عبد الکریم عباس ()	0	0		0	https://jfss.journals.ekb.eg/article_122145_25f6b9e8e8bc28e85fcd9cbcba53aeca.pdf	https://app.dimensions.ai/details/publication/pub.1132665422	44 Human Society; 4409 Social Work
210	504	pub.1131194397	10.1016/j.childyouth.2020.105509			Individual level predictors of implementation climate in child welfare services	Background Child welfare services (CWS) are characterized by having demanding work environments, large diversity in client needs, and limited use of evidence-based practices (EBPs). Thus, CWSs can benefit from quality improvement strategies. Accumulating evidence suggests that an organization’s strategic climate towards implementation of change and EBPs (i.e., Implementation Climate [IC]) is a cr…	Declaration of Competing Interest The authors declare that they have no known competing financial interests or personal relationships that could have appeared to influence the work reported in this paper. Acknowledgments We express our sincerest gratitude to the participating CWSs for making this study possible. Special thanks to our implementation champions at the CWSs and project staff at the R…	This study was funded by The Research Council of Norway (grant nr. 56496/H10), the Regional Centre for Child and Adolescent Mental Health, Eastern and Southern Norway (RBUP), the Norwegian Center for Child Behavioral Development (NUBU), and Stiftelsen Wøyen.	Children and Youth Services Review				2020-12	2020		2020-12	119		105509	All OA; Hybrid	Article	Engell, Thomas; Kirkøen, Benedicte; Aarons, Gregory A.; Hagen, Kristine Amlund	Engell, Thomas (Regional Centre for Child and Adolescent Mental Health, Eastern and Southern Norway, Department of Psychology, University of Oslo, Gullhaugveien 1-3, 0484 Oslo, Norway); Kirkøen, Benedicte (Regional Centre for Child and Adolescent Mental Health, Eastern and Southern Norway, Gullhaugveien 1-3, 0484 Oslo, Norway); Aarons, Gregory A. (Department of Psychiatry, University of Californi…	Engell, Thomas (University of Oslo)	Engell, Thomas (University of Oslo); Kirkøen, Benedicte (Center for Child and Adolescent Mental Health, Eastern and Southern Norway); Aarons, Gregory A. (University of California, San Diego); Hagen, Kristine Amlund (The Norwegian Center for Child Behavioral Development)	12	2		5.35	https://doi.org/10.1016/j.childyouth.2020.105509	https://app.dimensions.ai/details/publication/pub.1131194397	44 Human Society; 4409 Social Work
211	504	pub.1185624895	10.4038/sljsw.v8i4.14			3rd International Conference of Social Work; Social Security in 21st Century: Shared Partnership for Transformative Changes, 4th & 5th of September 2024	NA			Sri Lanka Journal of Social Work				2025-02-17	2025	2025-02-17		8	4	1-91	All OA; Hybrid	Article	-in-Chief, Co-Editors	-in-Chief, Co-Editors ()		-in-Chief, Co-Editors ()	0	0			https://account.sljsw.sljol.info/index.php/sljo-j-sljsw/article/download/14/14	https://app.dimensions.ai/details/publication/pub.1185624895	44 Human Society; 4409 Social Work
212	138	pub.1130307318	10.24966/pmrd-8670/100044			A Disability Identification-Diagnosis Process In Children With Disabilities Under Six Years Of Age And Associated Factors	Disability is a cause of burden for families and society. Early detection of disability assists disabled children with early intervention, enhances their function ability and improves their quality of life and social inclusion. Describe the process of disability identification and diagnosis for children with disabilities under six years old and related factors of this process.			Physical Medicine Rehabilitation & Disabilities				2020-03-24	2020	2020-03-24		6	1	1-13	All OA; Hybrid	Article	Thuy, Nguyen Thi Minh; Health, The Center Of Research And Action For Comprehensive	Thuy, Nguyen Thi Minh (); Health, The Center Of Research And Action For Comprehensive ()		Thuy, Nguyen Thi Minh (); Health, The Center Of Research And Action For Comprehensive ()	1	1		0.33	https://doi.org/10.24966/pmrd-8670/100044	https://app.dimensions.ai/details/publication/pub.1130307318	39 Education; 3904 Specialist Studies In Education; 42 Health Sciences; 4201 Allied Health and Rehabilitation Science; 44 Human Society; 4409 Social Work; 52 Psychology; 5204 Cognitive and Computational Psychology	4 Quality Education
